# Supplementary material
Source: publisher site journal article supplement (https://www.spandidos-publications.com/4607/downloadSupplementary)
Supplement: Supplementary file 1 [file downloadSupplementary]

## Sheet: Shhet 1
Table SXII. DO analysis down specific
doid	DO_Name	URL	out (458)	All (6225)	pvalue	qvalue	Genes
DOID:8432	polycythemia	http://www.ontobee.org/ontology/DOID?iri=http://purl.obolibrary.org/obo/DOID_8432	12	40	1.81669e-05	0.0182577	ABL1;CD177;ETV6;HGF;IDH1;IDH2;IGF1;KIT;SH2B3;SOCS3;STAT5A;VEGFA
DOID:10772	thrombotic thrombocytopenic purpura	http://www.ontobee.org/ontology/DOID?iri=http://purl.obolibrary.org/obo/DOID_10772	4	6	0.000385057	0.193491	ADAMTS13;F3;SERPINF2;VEGFA
DOID:0060082	breast benign neoplasm	http://www.ontobee.org/ontology/DOID?iri=http://purl.obolibrary.org/obo/DOID_0060082	5	12	0.00108201	0.259115	ERBB2;GJA1;IGF1;IGFBP3;RHEB
DOID:0060097	thoracic benign neoplasm	http://www.ontobee.org/ontology/DOID?iri=http://purl.obolibrary.org/obo/DOID_0060097	5	12	0.00108201	0.259115	ERBB2;GJA1;IGF1;IGFBP3;RHEB
DOID:4971	myelofibrosis	http://www.ontobee.org/ontology/DOID?iri=http://purl.obolibrary.org/obo/DOID_4971	10	45	0.00128913	0.259115	ETV6;FKBP5;IDH1;IDH2;KIT;LYN;RARB;SOCS3;THBS1;VEGFA
DOID:3369	peripheral primitive neuroectodermal tumor	http://www.ontobee.org/ontology/DOID?iri=http://purl.obolibrary.org/obo/DOID_3369	6	19	0.00182139	0.28428	CDKN2A;ERG;IGF1;IGFBP3;KIT;PDGFC
DOID:13042	persistent fetal circulation syndrome	http://www.ontobee.org/ontology/DOID?iri=http://purl.obolibrary.org/obo/DOID_13042	4	9	0.00270415	0.28428	HIF1A;LYVE1;TTR;VEGFA
DOID:1612	breast cancer	http://www.ontobee.org/ontology/DOID?iri=http://purl.obolibrary.org/obo/DOID_1612	50	461	0.00296049	0.28428	ADAM9;CCNE1;CDC25B;CDC42;CDKN2A;CTDSPL;DNMT3A;EDNRA;ERBB2;ESR1;ETV6;FOXA1;GJA1;HGF;HIF1A;HIF1AN;HOXA1;HSP90AA1;IGF1;IGFBP3;ITGA6;ITGA8;JAK1;KCNJ3;KCNJ3;KIT;LIF;NME1;PDE5A;PTP4A3;PTPRG;RHEB;SEMA3A;SIRT1;SKP2;SMAD2;SNAI1;SOCS3;SOX9;SRC;STAT5A;TFAP2C;TFAP2C;THBS1;VCP;VEGFA;VIM;WT1;WWP1;YBX1
DOID:5093	thoracic cancer	http://www.ontobee.org/ontology/DOID?iri=http://purl.obolibrary.org/obo/DOID_5093	50	461	0.00296049	0.28428	ADAM9;CCNE1;CDC25B;CDC42;CDKN2A;CTDSPL;DNMT3A;EDNRA;ERBB2;ESR1;ETV6;FOXA1;GJA1;HGF;HIF1A;HIF1AN;HOXA1;HSP90AA1;IGF1;IGFBP3;ITGA6;ITGA8;JAK1;KCNJ3;KCNJ3;KIT;LIF;NME1;PDE5A;PTP4A3;PTPRG;RHEB;SEMA3A;SIRT1;SKP2;SMAD2;SNAI1;SOCS3;SOX9;SRC;STAT5A;TFAP2C;TFAP2C;THBS1;VCP;VEGFA;VIM;WT1;WWP1;YBX1
DOID:4961	bone marrow disease	http://www.ontobee.org/ontology/DOID?iri=http://purl.obolibrary.org/obo/DOID_4961	16	103	0.00324641	0.28428	ABL1;CD177;ETV6;HGF;HSP90AA1;IDH1;IDH2;IGF1;KIT;PIGA;SH2B3;SOCS3;STAT5A;TINF2;VEGFA;WT1
DOID:3093	nervous system cancer	http://www.ontobee.org/ontology/DOID?iri=http://purl.obolibrary.org/obo/DOID_3093	53	504	0.00429845	0.28428	ALCAM;BACE1;BCL2L11;CAT;CCNE1;CCNE2;CDK2;CDKN2A;DFFA;DR1;ELAVL4;EPB41;EPHA2;ERBB2;ERG;ETV6;F3;FAP;FOXA1;GCLC;GDNF;GTF2I;HGF;HIF1A;HSP90AA1;IGF1;IGFBP3;IL6R;JAK1;KIT;LIF;LYVE1;MAP3K5;MTDH;MYBL2;NEDD9;NEUROD1;NHLH2;NME1;PDGFC;PSEN2;PTP4A3;RUNX2;SIRT1;SKP2;SMAD1;SOX9;TTR;VEGFA;VIM;VIP;WT1;YWHAZ
DOID:4960	bone marrow cancer	http://www.ontobee.org/ontology/DOID?iri=http://purl.obolibrary.org/obo/DOID_4960	34	292	0.00462774	0.28428	ABL1;BCL2L11;CALCR;CCND2;CCNK;CD177;CDKN2A;DDX5;ETV6;FKBP5;FRZB;GAB1;HGF;HNF1A;HSP90AA1;IDH1;IDH2;IGF1;IL6R;ITGA4;JAKMIP2;KIT;LYN;PRDM1;RAD23B;RARB;RUNX2;SKP2;SMAD2;SOCS1;SOCS3;THBS1;VEGFA;WT1
DOID:3111	cystadenocarcinoma	http://www.ontobee.org/ontology/DOID?iri=http://purl.obolibrary.org/obo/DOID_3111	8	37	0.00465616	0.28428	CDC25B;CDKN2A;ERBB2;KIT;MAP2K4;NME1;USP2;WT1
DOID:3114	serous cystadenocarcinoma	http://www.ontobee.org/ontology/DOID?iri=http://purl.obolibrary.org/obo/DOID_3114	8	37	0.00465616	0.28428	CDC25B;CDKN2A;ERBB2;KIT;MAP2K4;NME1;USP2;WT1
DOID:3459	breast carcinoma	http://www.ontobee.org/ontology/DOID?iri=http://purl.obolibrary.org/obo/DOID_3459	38	337	0.00488763	0.28428	CCNE1;CDC25B;CDKN2A;CTDSPL;DNMT3A;EDNRA;ERBB2;ESR1;ETV6;FOXA1;HIF1A;HIF1AN;HOXA1;HSP90AA1;IGF1;IGFBP3;ITGA8;KCNJ3;KCNJ3;KIT;LIF;NME1;PTP4A3;RHEB;SEMA3A;SIRT1;SKP2;SOCS3;SRC;STAT5A;TFAP2C;TFAP2C;VCP;VEGFA;VIM;WT1;WWP1;YBX1
DOID:2452	thrombophilia	http://www.ontobee.org/ontology/DOID?iri=http://purl.obolibrary.org/obo/DOID_2452	6	23	0.00526706	0.28428	ADAMTS13;F3;HGF;SERPINF2;THBD;VEGFA
DOID:3577	Sertoli cell tumor	http://www.ontobee.org/ontology/DOID?iri=http://purl.obolibrary.org/obo/DOID_3577	2	2	0.00540223	0.28428	SOX9;WT1
DOID:4757	sex cord-stromal neoplasm	http://www.ontobee.org/ontology/DOID?iri=http://purl.obolibrary.org/obo/DOID_4757	2	2	0.00540223	0.28428	SOX9;WT1
DOID:5165	uterine corpus sarcoma	http://www.ontobee.org/ontology/DOID?iri=http://purl.obolibrary.org/obo/DOID_5165	2	2	0.00540223	0.28428	CDKN2A;WT1
DOID:1686	glaucoma	http://www.ontobee.org/ontology/DOID?iri=http://purl.obolibrary.org/obo/DOID_1686	14	90	0.00565731	0.28428	ADRB1;COL8A1;EDNRA;ESR1;FOXC1;GJA1;PEX5;PITX2;SLC4A10;TNFRSF1A;TTR;VCP;VEGFA;ZEB1
DOID:0070004	myeloma	http://www.ontobee.org/ontology/DOID?iri=http://purl.obolibrary.org/obo/DOID_0070004	33	287	0.00634185	0.292279	ABL1;BCL2L11;CALCR;CCND2;CCNK;CD177;CDKN2A;DDX5;ETV6;FKBP5;FRZB;GAB1;HGF;HNF1A;HSP90AA1;IDH1;IDH2;IGF1;IL6R;ITGA4;KIT;LYN;PRDM1;RAD23B;RARB;RUNX2;SKP2;SMAD2;SOCS1;SOCS3;THBS1;VEGFA;WT1
DOID:8552	chronic myeloid leukemia	http://www.ontobee.org/ontology/DOID?iri=http://purl.obolibrary.org/obo/DOID_8552	6	24	0.00659564	0.292279	BCL2L11;CBL;CDKN2A;KIT;LYN;SOCS3
DOID:1824	status epilepticus	http://www.ontobee.org/ontology/DOID?iri=http://purl.obolibrary.org/obo/DOID_1824	3	6	0.00668898	0.292279	LGI1;SCN1A;SOCS1
DOID:162	cancer	http://www.ontobee.org/ontology/DOID?iri=http://purl.obolibrary.org/obo/DOID_162	334	4220	0.0077815	0.325026	ABHD6;ABI3BP;ABL1;ACO1;ACTR1A;ACVR1;ADAM12;ADAM19;ADAM9;ADAMTS13;ADORA1;ADRB1;ADRM1;AKAP10;AKR1C2;ALCAM;ARGLU1;ARID4A;ARL4A;ATF1;ATF5;ATF5;ATOH1;ATP6V0B;AZIN1;B3GNT2;BACE1;BACH2;BCL2L10;BCL2L11;BCL6;BECN1;BHLHE40;BTF3;BTG3;CALB2;CALCR;CAPN5;CAT;CBL;CCDC6;CCKBR;CCL18;CCND2;CCNE1;CCNE2;CCNK;CCNL1;CD177;CDC14A;CDC25A;CDC25B;CDC42;CDK2;CDK8;CDKN2A;CHL1;CKS1B;CRIM1;CRMP1;CSNK1A1;CTDSPL;CTNND2;CYP24A1;…
DOID:3347	osteosarcoma	http://www.ontobee.org/ontology/DOID?iri=http://purl.obolibrary.org/obo/DOID_3347	25	205	0.00808523	0.325026	BCL6;CCNE1;CDKN2A;EPHA2;ERBB2;ESR1;HGF;HIF1A;IDH1;IGF1;IGFBP3;ITGA4;KIT;LPAR3;MAP2K4;MAP3K5;PDGFA;RUNX2;SIX1;SMAD2;URGCP;VCP;VEGFA;WT1;YY1
DOID:201	connective tissue cancer	http://www.ontobee.org/ontology/DOID?iri=http://purl.obolibrary.org/obo/DOID_201	39	360	0.0085369	0.329984	ACTR1A;BCL6;CCNE1;CDKN2A;EPHA2;ERBB2;ESR1;ETV6;F2RL3;F3;FUS;GAB1;HGF;HIF1A;IDH1;IGF1;IGF2BP2;IGFBP3;ITGA4;KIT;LPAR3;LYN;MAP2K4;MAP3K5;PDGFA;RARB;RUNX2;SIX1;SIX3;SMAD2;SNAI1;SOX9;SRC;TNFRSF1A;URGCP;VCP;VEGFA;WT1;YY1
DOID:1192	peripheral nervous system neoplasm	http://www.ontobee.org/ontology/DOID?iri=http://purl.obolibrary.org/obo/DOID_1192	39	362	0.00933177	0.3394	ALCAM;BACE1;BCL2L11;CDK2;CDKN2A;DFFA;DR1;ELAVL4;EPHA2;ERG;F3;FOXA1;GCLC;GDNF;HGF;HIF1A;IGF1;IGFBP3;IL6R;KIT;LIF;LYVE1;MTDH;MYBL2;NEDD9;NEUROD1;NHLH2;NME1;PDGFC;PSEN2;PTP4A3;SIRT1;SKP2;SMAD1;SOX9;TTR;VEGFA;VIM;VIP
DOID:1749	squamous cell carcinoma	http://www.ontobee.org/ontology/DOID?iri=http://purl.obolibrary.org/obo/DOID_1749	63	643	0.00945591	0.3394	ALCAM;BCL2L11;BECN1;CAT;CCKBR;CCND2;CCNE1;CCNL1;CDC42;CDK2;CDKN2A;CKS1B;DDIT4;DNMT3A;EPHA2;ERBB2;ESR1;FADD;GALNT3;GALR1;GNAI2;GRB10;HGF;HIF1A;HIF1AN;HOXD9;HSP90AA1;IGF1;IGFBP3;ITGA4;ITGA6;KIT;LAMB3;LAT;LMO4;MAP2K4;MTDH;NEDD9;NME1;PTP4A1;PTP4A1;PTP4A3;PTPN13;RAP1B;RARB;RCHY1;SERPINF2;SKP2;SMAD2;SNAI1;SOCS3;SRC;ST6GAL1;STAT5A;TFRC;TGM3;THBS1;TNFRSF1A;TSC1;UNG;VEGFA;VIM;WT1
DOID:1115	sarcoma	http://www.ontobee.org/ontology/DOID?iri=http://purl.obolibrary.org/obo/DOID_1115	22	179	0.0115025	0.377158	ATF1;CCNE1;CDC25A;CDK8;CDKN2A;EDNRA;ERBB2;ERG;FUS;GAB1;HIF1A;IGF1;IGFBP3;KIT;LYVE1;NKX2-2;SNAI1;THBS1;TIA1;VEGFA;VIM;WT1
DOID:12603	acute leukemia	http://www.ontobee.org/ontology/DOID?iri=http://purl.obolibrary.org/obo/DOID_12603	14	99	0.0129843	0.377158	BCL2L10;CCNE1;ERG;ETV6;GJA1;MNT;NME1;NNAT;PICALM;SKP2;ST3GAL5;ST6GAL1;VEGFA;WT1
DOID:234	colon adenocarcinoma	http://www.ontobee.org/ontology/DOID?iri=http://purl.obolibrary.org/obo/DOID_234	6	28	0.0143788	0.377158	ITGA6;PTP4A1;PTP4A1;PTP4A3;ST6GAL1;STAT5A
DOID:230	lateral sclerosis	http://www.ontobee.org/ontology/DOID?iri=http://purl.obolibrary.org/obo/DOID_230	14	101	0.0153279	0.377158	FUS;GRIA2;HGF;IGF1;NEFM;PON2;PON2;RRAD;RRAD;TMEM106B;TNFRSF1A;VAPA;VCP;VEGFA
DOID:10011	thyroid lymphoma	http://www.ontobee.org/ontology/DOID?iri=http://purl.obolibrary.org/obo/DOID_10011	2	3	0.015415	0.377158	CDC25A;CDC25B
DOID:10350	breast cyst	http://www.ontobee.org/ontology/DOID?iri=http://purl.obolibrary.org/obo/DOID_10350	2	3	0.015415	0.377158	IGF1;IGFBP3
DOID:2750	glycogen storage disease IV	http://www.ontobee.org/ontology/DOID?iri=http://purl.obolibrary.org/obo/DOID_2750	2	3	0.015415	0.377158	KCNJ3;KCNJ3
DOID:420	hypertrichosis	http://www.ontobee.org/ontology/DOID?iri=http://purl.obolibrary.org/obo/DOID_420	2	3	0.015415	0.377158	SLC29A3;SOX9
DOID:8791	breast carcinoma in situ	http://www.ontobee.org/ontology/DOID?iri=http://purl.obolibrary.org/obo/DOID_8791	2	3	0.015415	0.377158	CCND2;RARB
DOID:9460	uterine corpus cancer	http://www.ontobee.org/ontology/DOID?iri=http://purl.obolibrary.org/obo/DOID_9460	2	3	0.015415	0.377158	CDKN2A;WT1
DOID:14566	disease of cellular proliferation	http://www.ontobee.org/ontology/DOID?iri=http://purl.obolibrary.org/obo/DOID_14566	335	4269	0.0155277	0.377158	ABHD6;ABI3BP;ABL1;ACO1;ACTR1A;ACVR1;ADAM12;ADAM19;ADAM9;ADAMTS13;ADORA1;ADRB1;ADRM1;AKAP10;AKR1C2;ALCAM;ARGLU1;ARID4A;ARL4A;ATF1;ATF5;ATF5;ATOH1;ATP6V0B;AZIN1;B3GNT2;BACE1;BACH2;BCL2L10;BCL2L11;BCL6;BECN1;BHLHE40;BTF3;BTG3;CALB2;CALCR;CAPN5;CAT;CBL;CCDC6;CCKBR;CCL18;CCND2;CCNE1;CCNE2;CCNK;CCNL1;CD177;CDC14A;CDC25A;CDC25B;CDC42;CDK2;CDK8;CDKN2A;CHL1;CKS1B;CRIM1;CRMP1;CSNK1A1;CTDSPL;CTNND2;CYP24A1;…
DOID:1682	congenital heart disease	http://www.ontobee.org/ontology/DOID?iri=http://purl.obolibrary.org/obo/DOID_1682	9	54	0.0158919	0.377158	ACTC1;ACVR1;F3;GATA6;GJA1;JARID2;PITX2;TLL1;VEGFA
DOID:11247	disseminated intravascular coagulation	http://www.ontobee.org/ontology/DOID?iri=http://purl.obolibrary.org/obo/DOID_11247	4	14	0.0159912	0.377158	ADAMTS13;F3;HGF;THBD
DOID:305	carcinoma	http://www.ontobee.org/ontology/DOID?iri=http://purl.obolibrary.org/obo/DOID_305	73	782	0.0161969	0.377158	ALCAM;ATF1;ATOH1;BCL2L11;BECN1;CAT;CCKBR;CCND2;CCNE1;CCNL1;CDC25B;CDC42;CDK2;CDKN2A;CKS1B;DDIT4;DNMT3A;EPHA2;ERBB2;ESR1;FADD;GALNT3;GALR1;GNAI2;GRB10;HGF;HIF1A;HIF1AN;HOXD9;HSP90AA1;IGF1;IGFBP3;ITGA4;ITGA6;KEAP1;KIT;LAMB3;LAT;LMO4;MAP2K4;MMP15;MTDH;NEDD9;NEUROD1;NME1;PDGFA;PTP4A1;PTP4A1;PTP4A3;PTPN13;RAP1B;RARB;RCHY1;RUNX2;SERPINF2;SKP2;SMAD2;SNAI1;SOCS3;SOX4;SRC;ST6GAL1;STAT5A;TFRC;TGM3;THBS1;TN…
DOID:1618	breast fibroadenoma	http://www.ontobee.org/ontology/DOID?iri=http://purl.obolibrary.org/obo/DOID_1618	3	8	0.0167569	0.377158	ERBB2;GJA1;RHEB
DOID:3908	non-small cell lung carcinoma	http://www.ontobee.org/ontology/DOID?iri=http://purl.obolibrary.org/obo/DOID_3908	40	388	0.0170634	0.377158	ADAM12;BHLHE40;CCNE1;CDC25B;CDC42;CDKN2A;CRMP1;DDIT4;DESI2;DLC1;EPHA2;ERBB2;ESR1;F3;FADD;GALNT3;GJA1;HGF;HIF1A;HSP90AA1;IGF1;IGFBP3;KEAP1;KIT;LPL;NEDD4;NME1;NNAT;PEA15;RARB;RCHY1;SKP2;SOCS3;SOX9;SRC;UBE2I;USF2;VEGFA;WT1;YBX1
DOID:2621	autonomic nervous system neoplasm	http://www.ontobee.org/ontology/DOID?iri=http://purl.obolibrary.org/obo/DOID_2621	35	331	0.0175196	0.377158	ALCAM;BACE1;BCL2L11;CDK2;CDKN2A;DFFA;DR1;ELAVL4;EPHA2;F3;FOXA1;GCLC;GDNF;HGF;HIF1A;IGF1;IL6R;KIT;LIF;LYVE1;MTDH;MYBL2;NEDD9;NEUROD1;NHLH2;NME1;PSEN2;PTP4A3;SIRT1;SKP2;SMAD1;TTR;VEGFA;VIM;VIP
DOID:769	neuroblastoma	http://www.ontobee.org/ontology/DOID?iri=http://purl.obolibrary.org/obo/DOID_769	35	331	0.0175196	0.377158	ALCAM;BACE1;BCL2L11;CDK2;CDKN2A;DFFA;DR1;ELAVL4;EPHA2;F3;FOXA1;GCLC;GDNF;HGF;HIF1A;IGF1;IL6R;KIT;LIF;LYVE1;MTDH;MYBL2;NEDD9;NEUROD1;NHLH2;NME1;PSEN2;PTP4A3;SIRT1;SKP2;SMAD1;TTR;VEGFA;VIM;VIP
DOID:1781	thyroid cancer	http://www.ontobee.org/ontology/DOID?iri=http://purl.obolibrary.org/obo/DOID_1781	23	197	0.0176382	0.377158	BCL6;CCDC6;CCKBR;CCNE1;CDC25A;CDC25B;CDKN2A;ERBB2;ESR1;FOXA2;HIF1A;IGF1;ITGA6;KIT;LIF;P2RY1;POP1;RAP1B;RUNX2;SNAI1;TFRC;THBS1;VEGFA
DOID:0050736	autosomal dominant disease	http://www.ontobee.org/ontology/DOID?iri=http://purl.obolibrary.org/obo/DOID_0050736	31	287	0.0187251	0.392057	ABL1;CBL;CDK2;CDKN2A;DDIT4;ERBB2;ESR1;FOXA1;FOXC1;GTF2I;HERC2;HIF1A;HNRNPA1;HOXA5;IGF1;KIT;LMO4;MAP3K1;NME1;PITX2;RARB;RBBP8;RHEB;SHOC2;SIX1;SKP2;SRC;TSC1;UBE2I;VEGFA;WT1
DOID:0050686	organ system cancer	http://www.ontobee.org/ontology/DOID?iri=http://purl.obolibrary.org/obo/DOID_0050686	222	2727	0.0208265	0.423013	ABL1;ACO1;ACTR1A;ADAM12;ADAM9;ADAMTS13;AKR1C2;ALCAM;ATF1;ATF5;ATF5;ATOH1;BACE1;BACH2;BCL2L10;BCL2L11;BCL6;BECN1;BHLHE40;BTF3;BTG3;CALCR;CAT;CBL;CCDC6;CCKBR;CCL18;CCND2;CCNE1;CCNE2;CCNK;CCNL1;CD177;CDC25A;CDC25B;CDC42;CDK2;CDK8;CDKN2A;CHL1;CKS1B;CRIM1;CRMP1;CTDSPL;CTNND2;CYSLTR1;DDIT4;DDX5;DESI2;DFFA;DKK2;DLC1;DNMT3A;DPT;DR1;EDNRA;EED;ELAVL4;EPB41;EPHA2;EPHA7;ERBB2;ERG;ESR1;ETV6;F2RL3;F3;FADD;FAP;…
DOID:289	endometriosis	http://www.ontobee.org/ontology/DOID?iri=http://purl.obolibrary.org/obo/DOID_289	13	95	0.0210454	0.423013	ACTN1;CAT;CDKN2A;DFFA;ESR1;IGF1;IGFBP3;IL6R;LIF;PDGFA;VEGFA;WNT7A;WT1
DOID:14330	Parkinson's disease	http://www.ontobee.org/ontology/DOID?iri=http://purl.obolibrary.org/obo/DOID_14330	19	158	0.0222918	0.42621	ABL1;CCKBR;CDKN2A;ELAVL4;ESR1;FADD;FGF20;GDNF;GLUD2;IGF1;LY6E;MAP3K5;NEDD9;NR4A2;PHACTR2;SIAH1;SLC18A2;VEGFA;YWHAZ
DOID:423	myopathy	http://www.ontobee.org/ontology/DOID?iri=http://purl.obolibrary.org/obo/DOID_423	24	213	0.0230336	0.42621	ACADS;ACTC1;ACVR1;BACE1;CDKN2A;COL9A3;FHL1;GDNF;HGF;HNRNPA1;IGF1;IGFBP3;IL1RAPL2;KCNJ2;MBNL1;NR3C1;PDGFA;RAB7A;SYNCRIP;THBS1;UCP3;VCP;VEGFA;WT1
DOID:66	muscle tissue disease	http://www.ontobee.org/ontology/DOID?iri=http://purl.obolibrary.org/obo/DOID_66	24	213	0.0230336	0.42621	ACADS;ACTC1;ACVR1;BACE1;CDKN2A;COL9A3;FHL1;GDNF;HGF;HNRNPA1;IGF1;IGFBP3;IL1RAPL2;KCNJ2;MBNL1;NR3C1;PDGFA;RAB7A;SYNCRIP;THBS1;UCP3;VCP;VEGFA;WT1
DOID:11830	myopia	http://www.ontobee.org/ontology/DOID?iri=http://purl.obolibrary.org/obo/DOID_11830	6	31	0.0233249	0.42621	ACTC1;BMP2K;CTNND2;HGF;IGF1;RARB
DOID:2228	thrombocytosis	http://www.ontobee.org/ontology/DOID?iri=http://purl.obolibrary.org/obo/DOID_2228	6	31	0.0233249	0.42621	ABL1;CD177;IDH1;IDH2;THBS1;VEGFA
DOID:0080000	muscular disease	http://www.ontobee.org/ontology/DOID?iri=http://purl.obolibrary.org/obo/DOID_0080000	25	225	0.0240885	0.432303	ACADS;ACTC1;ACVR1;BACE1;CDKN2A;COL9A3;FHL1;GDNF;HGF;HLX;HNRNPA1;IGF1;IGFBP3;IL1RAPL2;KCNJ2;MBNL1;NR3C1;PDGFA;RAB7A;SYNCRIP;THBS1;UCP3;VCP;VEGFA;WT1
DOID:9253	gastrointestinal stromal tumor	http://www.ontobee.org/ontology/DOID?iri=http://purl.obolibrary.org/obo/DOID_9253	4	16	0.0258672	0.452946	CDKN2A;IGF1;KIT;WT1
DOID:170	endocrine gland cancer	http://www.ontobee.org/ontology/DOID?iri=http://purl.obolibrary.org/obo/DOID_170	45	459	0.0264697	0.452946	BCL6;BTF3;CCDC6;CCKBR;CCNE1;CDC25A;CDC25B;CDKN2A;EPHA2;EPHA7;ERBB2;ESR1;F2RL3;F3;FAP;FOXA2;GALNT3;HGF;HIF1A;HSP90AA1;IGF1;IGFBP3;IL6R;ITGA6;KIT;KLF10;LIF;MAP2K4;MAP3K1;MAP3K5;P2RY1;PDGFA;POP1;RAP1B;RARG;RUNX2;SEMA3A;SIAH1;SKP2;SMAD1;SNAI1;SOCS3;TFRC;THBS1;VEGFA
DOID:11204	allergic conjunctivitis	http://www.ontobee.org/ontology/DOID?iri=http://purl.obolibrary.org/obo/DOID_11204	2	4	0.0293333	0.452946	SOCS3;SOCS5
DOID:12271	aniridia	http://www.ontobee.org/ontology/DOID?iri=http://purl.obolibrary.org/obo/DOID_12271	2	4	0.0293333	0.452946	FOXC1;WT1
DOID:14686	Axenfeld-Rieger syndrome	http://www.ontobee.org/ontology/DOID?iri=http://purl.obolibrary.org/obo/DOID_14686	2	4	0.0293333	0.452946	FOXC1;PITX2
DOID:2475	chronic conjunctivitis	http://www.ontobee.org/ontology/DOID?iri=http://purl.obolibrary.org/obo/DOID_2475	2	4	0.0293333	0.452946	SOCS3;SOCS5
DOID:4359	amelanotic melanoma	http://www.ontobee.org/ontology/DOID?iri=http://purl.obolibrary.org/obo/DOID_4359	2	4	0.0293333	0.452946	CDKN2A;VEGFA
DOID:9080	macroglobulinemia	http://www.ontobee.org/ontology/DOID?iri=http://purl.obolibrary.org/obo/DOID_9080	2	4	0.0293333	0.452946	ITGA4;KIT
DOID:2531	hematologic cancer	http://www.ontobee.org/ontology/DOID?iri=http://purl.obolibrary.org/obo/DOID_2531	97	1107	0.0298388	0.452946	ABL1;ATF1;BACH2;BCL2L10;BCL2L11;BCL6;BECN1;CALCR;CBL;CCKBR;CCL18;CCND2;CCNE1;CCNK;CD177;CDC42;CDKN2A;CRIM1;CRMP1;DDX5;DLC1;DNMT3A;EED;EPHA2;ERBB2;ERG;ESR1;ETV6;F3;FKBP5;FOSL2;FRZB;FUS;GAB1;GJA1;HGF;HIF1A;HLF;HNF1A;HNRNPA1;HOXA11;HRK;HSP90AA1;IDH1;IDH2;IGF1;IKZF2;IL21R;IL6R;ITGA4;JAK1;JAKMIP2;KIT;KLF10;LIF;LPAR3;LPL;LYN;MAP3K5;MNT;MNX1;NKX2-2;NME1;NNAT;NR3C1;NRBP1;NRXN1;PDE4D;PICALM;PRDM1;PTPRG;RA…
DOID:0060083	immune system cancer	http://www.ontobee.org/ontology/DOID?iri=http://purl.obolibrary.org/obo/DOID_0060083	98	1120	0.0300278	0.452946	ABL1;ATF1;BACH2;BCL2L10;BCL2L11;BCL6;BECN1;CALCR;CBL;CCKBR;CCL18;CCND2;CCNE1;CCNK;CD177;CDC42;CDKN2A;CRIM1;CRMP1;DDX5;DLC1;DNMT3A;EED;EPHA2;ERBB2;ERG;ESR1;ETV6;F3;FKBP5;FOSL2;FRZB;FUS;GAB1;GJA1;HGF;HIF1A;HLF;HNF1A;HNRNPA1;HOXA11;HRK;HSP90AA1;IDH1;IDH2;IGF1;IKZF2;IL21R;IL6R;ITGA4;JAK1;JAKMIP2;KIT;KLF10;LIF;LPAR3;LPL;LYN;MAP3K5;MNT;MNX1;NKX2-2;NME1;NNAT;NR3C1;NRBP1;NRXN1;PDE4D;PICALM;PRDM1;PTPRG;RA…
DOID:3905	lung carcinoma	http://www.ontobee.org/ontology/DOID?iri=http://purl.obolibrary.org/obo/DOID_3905	45	463	0.0301964	0.452946	ADAM12;BHLHE40;CCNE1;CDC25B;CDC42;CDKN2A;CRMP1;DDIT4;DESI2;DLC1;EPHA2;ERBB2;ESR1;F3;FADD;GALNT3;GDNF;GJA1;HGF;HIF1A;HSP90AA1;IGF1;IGFBP3;KEAP1;KIT;LPL;NEDD4;NME1;NNAT;NR3C1;PEA15;RARB;RASA1;RCHY1;SKP2;SOCS3;SOX9;SRC;UBE2I;USF2;VEGFA;WNT7A;WT1;YBX1;YY1
DOID:1793	pancreatic cancer	http://www.ontobee.org/ontology/DOID?iri=http://purl.obolibrary.org/obo/DOID_1793	31	299	0.0311894	0.46096	BTF3;CCKBR;CCNE1;CDKN2A;EPHA2;EPHA7;ERBB2;F2RL3;F3;FAP;GALNT3;HGF;HIF1A;HSP90AA1;IGF1;IL6R;ITGA6;KIT;KLF10;LIF;MAP2K4;MAP3K1;MAP3K5;PDGFA;RARG;SEMA3A;SIAH1;SMAD1;SOCS3;THBS1;VEGFA
DOID:3308	embryonal carcinoma	http://www.ontobee.org/ontology/DOID?iri=http://purl.obolibrary.org/obo/DOID_3308	4	17	0.0319143	0.461669	CCND2;PRDM1;SOX17;ZNF202
DOID:2444	hyperpituitarism	http://www.ontobee.org/ontology/DOID?iri=http://purl.obolibrary.org/obo/DOID_2444	3	10	0.032156	0.461669	CDKN2A;IGF1;IGFBP3
DOID:768	retinoblastoma	http://www.ontobee.org/ontology/DOID?iri=http://purl.obolibrary.org/obo/DOID_768	14	112	0.034436	0.46418	CCNE1;CCNE2;CDK2;CDKN2A;ERBB2;GTF2I;HIF1A;IGF1;IGFBP3;MAP3K5;NME1;RUNX2;VEGFA;WT1
DOID:771	retinal cell cancer	http://www.ontobee.org/ontology/DOID?iri=http://purl.obolibrary.org/obo/DOID_771	14	112	0.034436	0.46418	CCNE1;CCNE2;CDK2;CDKN2A;ERBB2;GTF2I;HIF1A;IGF1;IGFBP3;MAP3K5;NME1;RUNX2;VEGFA;WT1
DOID:2151	malignant ovarian surface epithelial-stromal neoplasm	http://www.ontobee.org/ontology/DOID?iri=http://purl.obolibrary.org/obo/DOID_2151	28	267	0.0346403	0.46418	ALCAM;BECN1;CCL18;CCNE1;CDKN2A;CHL1;EDNRA;ERBB2;ESR1;HIF1A;IGFBP3;KIT;LIF;LIN28A;MTDH;NME1;SKP2;SNAI1;SRC;ST3GAL5;TGFB2;THBS1;TNFRSF1A;TPT1;USP2;VEGFA;YBX1;YWHAZ
DOID:2152	ovary epithelial cancer	http://www.ontobee.org/ontology/DOID?iri=http://purl.obolibrary.org/obo/DOID_2152	28	267	0.0346403	0.46418	ALCAM;BECN1;CCL18;CCNE1;CDKN2A;CHL1;EDNRA;ERBB2;ESR1;HIF1A;IGFBP3;KIT;LIF;LIN28A;MTDH;NME1;SKP2;SNAI1;SRC;ST3GAL5;TGFB2;THBS1;TNFRSF1A;TPT1;USP2;VEGFA;YBX1;YWHAZ
DOID:4001	ovarian carcinoma	http://www.ontobee.org/ontology/DOID?iri=http://purl.obolibrary.org/obo/DOID_4001	28	267	0.0346403	0.46418	ALCAM;BECN1;CCL18;CCNE1;CDKN2A;CHL1;EDNRA;ERBB2;ESR1;HIF1A;IGFBP3;KIT;LIF;LIN28A;MTDH;NME1;SKP2;SNAI1;SRC;ST3GAL5;TGFB2;THBS1;TNFRSF1A;TPT1;USP2;VEGFA;YBX1;YWHAZ
DOID:2394	ovarian cancer	http://www.ontobee.org/ontology/DOID?iri=http://purl.obolibrary.org/obo/DOID_2394	30	291	0.0359717	0.466128	ALCAM;BECN1;CCL18;CCNE1;CDKN2A;CHL1;EDNRA;ERBB2;ESR1;HIF1A;IGF1;IGFBP3;KIT;LIF;LIN28A;MTDH;NME1;SKP2;SNAI1;SRC;ST3GAL5;TGFB2;THBS1;TNFRSF1A;TPT1;USP2;VEGFA;WT1;YBX1;YWHAZ
DOID:0060116	sensory system cancer	http://www.ontobee.org/ontology/DOID?iri=http://purl.obolibrary.org/obo/DOID_0060116	16	134	0.0361771	0.466128	CCNE1;CCNE2;CDK2;CDKN2A;ERBB2;GTF2I;HIF1A;HSP90AA1;IGF1;IGFBP3;KIT;MAP3K5;NME1;RUNX2;VEGFA;WT1
DOID:2174	ocular cancer	http://www.ontobee.org/ontology/DOID?iri=http://purl.obolibrary.org/obo/DOID_2174	16	134	0.0361771	0.466128	CCNE1;CCNE2;CDK2;CDKN2A;ERBB2;GTF2I;HIF1A;HSP90AA1;IGF1;IGFBP3;KIT;MAP3K5;NME1;RUNX2;VEGFA;WT1
DOID:3181	oligodendroglioma	http://www.ontobee.org/ontology/DOID?iri=http://purl.obolibrary.org/obo/DOID_3181	4	18	0.0387201	0.471248	IDH1;IDH2;MTDH;PDGFA
DOID:53	pituitary gland disease	http://www.ontobee.org/ontology/DOID?iri=http://purl.obolibrary.org/obo/DOID_53	4	18	0.0387201	0.471248	CDKN2A;IGF1;IGFBP3;SIX3
DOID:4645	retinal cancer	http://www.ontobee.org/ontology/DOID?iri=http://purl.obolibrary.org/obo/DOID_4645	14	114	0.0392278	0.471248	CCNE1;CCNE2;CDK2;CDKN2A;ERBB2;GTF2I;HIF1A;IGF1;IGFBP3;MAP3K5;NME1;RUNX2;VEGFA;WT1
DOID:0050622	reproductive organ benign neoplasm	http://www.ontobee.org/ontology/DOID?iri=http://purl.obolibrary.org/obo/DOID_0050622	7	44	0.03981	0.471248	CDKN2A;ESR1;IGF1;KLF11;SOX9;VEGFA;WT1
DOID:231	motor neuron disease	http://www.ontobee.org/ontology/DOID?iri=http://purl.obolibrary.org/obo/DOID_231	19	170	0.0431532	0.471248	FUS;GDNF;GRIA2;HGF;IGF1;IGFBP3;NEFM;PON2;PON2;RRAD;RRAD;SMAD2;SYNCRIP;TIA1;TMEM106B;TNFRSF1A;VAPA;VCP;VEGFA
DOID:3969	papillary thyroid carcinoma	http://www.ontobee.org/ontology/DOID?iri=http://purl.obolibrary.org/obo/DOID_3969	12	95	0.044821	0.471248	BCL6;CCDC6;CCNE1;CDKN2A;ERBB2;FOXA2;HIF1A;POP1;RAP1B;RUNX2;TFRC;VEGFA
DOID:1085	Edwards syndrome	http://www.ontobee.org/ontology/DOID?iri=http://purl.obolibrary.org/obo/DOID_1085	2	5	0.0465309	0.471248	ADAM12;VAPA
DOID:11726	Emery-Dreifuss muscular dystrophy	http://www.ontobee.org/ontology/DOID?iri=http://purl.obolibrary.org/obo/DOID_11726	2	5	0.0465309	0.471248	FHL1;YTHDC1
DOID:2449	acromegaly	http://www.ontobee.org/ontology/DOID?iri=http://purl.obolibrary.org/obo/DOID_2449	2	5	0.0465309	0.471248	IGF1;IGFBP3
DOID:4235	spindle cell sarcoma	http://www.ontobee.org/ontology/DOID?iri=http://purl.obolibrary.org/obo/DOID_4235	2	5	0.0465309	0.471248	CCNE1;WT1
DOID:4411	hepatitis E	http://www.ontobee.org/ontology/DOID?iri=http://purl.obolibrary.org/obo/DOID_4411	2	5	0.0465309	0.471248	CBL;HIF1A
DOID:4852	pleomorphic xanthoastrocytoma	http://www.ontobee.org/ontology/DOID?iri=http://purl.obolibrary.org/obo/DOID_4852	2	5	0.0465309	0.471248	CDKN2A;TSC1
DOID:6195	conjunctivitis	http://www.ontobee.org/ontology/DOID?iri=http://purl.obolibrary.org/obo/DOID_6195	2	5	0.0465309	0.471248	SOCS3;SOCS5
DOID:1324	lung cancer	http://www.ontobee.org/ontology/DOID?iri=http://purl.obolibrary.org/obo/DOID_1324	50	541	0.0505965	0.471248	ADAM12;BCL2L11;BHLHE40;CCNE1;CDC25B;CDC42;CDKN2A;CRMP1;DDIT4;DESI2;DLC1;EPHA2;ERBB2;ESR1;F3;FADD;GALNT3;GDNF;GJA1;HGF;HIF1A;HSP90AA1;IGF1;IGFBP3;KCNJ3;KCNJ3;KEAP1;KIT;LPL;MAP3K1;NEDD4;NME1;NNAT;NR3C1;PEA15;RARB;RASA1;RCHY1;SKP2;SMAD1;SOCS3;SOX9;SRC;UBE2I;USF2;VEGFA;WNT7A;WT1;YBX1;YY1
DOID:3963	thyroid carcinoma	http://www.ontobee.org/ontology/DOID?iri=http://purl.obolibrary.org/obo/DOID_3963	20	185	0.0518624	0.471248	BCL6;CCDC6;CCKBR;CCNE1;CDKN2A;ERBB2;ESR1;FOXA2;HIF1A;IGF1;ITGA6;KIT;LIF;POP1;RAP1B;RUNX2;SNAI1;TFRC;THBS1;VEGFA
DOID:9538	multiple myeloma	http://www.ontobee.org/ontology/DOID?iri=http://purl.obolibrary.org/obo/DOID_9538	24	231	0.0525456	0.471248	BCL2L11;CALCR;CCND2;CCNK;CDKN2A;DDX5;FRZB;GAB1;HGF;HNF1A;HSP90AA1;IGF1;IL6R;ITGA4;KIT;LYN;PRDM1;RAD23B;RUNX2;SKP2;SMAD2;SOCS1;VEGFA;WT1
DOID:3382	liposarcoma	http://www.ontobee.org/ontology/DOID?iri=http://purl.obolibrary.org/obo/DOID_3382	3	12	0.0528427	0.471248	CDKN2A;FUS;IGF2BP2
DOID:3500	gallbladder adenocarcinoma	http://www.ontobee.org/ontology/DOID?iri=http://purl.obolibrary.org/obo/DOID_3500	3	12	0.0528427	0.471248	CDKN2A;ERBB2;NME1
DOID:3939	lipomatous cancer	http://www.ontobee.org/ontology/DOID?iri=http://purl.obolibrary.org/obo/DOID_3939	3	12	0.0528427	0.471248	CDKN2A;FUS;IGF2BP2
DOID:5614	eye disease	http://www.ontobee.org/ontology/DOID?iri=http://purl.obolibrary.org/obo/DOID_5614	50	543	0.0534041	0.471248	ACTC1;ADAM9;ADRB1;BMP2K;CAT;CBL;CCNE1;CCNE2;CDK2;CDKN2A;COL8A1;CTNND2;EDNRA;EPHA2;ERBB2;ESR1;F3;FOXC1;GJA1;GTF2I;HGF;HIF1A;HNRNPA1;IGF1;IGFBP3;KEAP1;KIT;MAP3K5;MDM1;NME1;PEX5;PITX2;RARB;RORA;RUNX2;SIRT1;SKP2;SLC4A10;SNRNP200;SOCS3;SOCS5;TEAD1;TGFB2;TNFRSF1A;TRIB2;TTR;VCP;VEGFA;WT1;ZEB1
DOID:299	adenocarcinoma	http://www.ontobee.org/ontology/DOID?iri=http://purl.obolibrary.org/obo/DOID_299	17	152	0.0534758	0.471248	ATF1;ATOH1;CAT;CDC25B;CDKN2A;ERBB2;HIF1A;IGF1;ITGA6;KEAP1;KIT;MAP2K4;NME1;PDGFA;USP2;VEGFA;WT1
DOID:630	genetic disease	http://www.ontobee.org/ontology/DOID?iri=http://purl.obolibrary.org/obo/DOID_630	62	692	0.0537549	0.471248	ABL1;ACADS;ACVR1;ADAM12;ADRB1;BACE1;BCL6;CALCR;CBL;CDK2;CDKN2A;CRMP1;DDIT4;EDNRA;ELF2;ERBB2;ESR1;FOXA1;FOXC1;GABRA5;GCLC;GRB2;GTF2I;HERC2;HIF1A;HNRNPA1;HOXA5;IGF1;IGFBP3;IL6R;ITGA4;ITSN1;KCND3;KIT;LMO4;MAP3K1;NME1;NR3C1;PITX2;RARB;RBBP8;RHEB;RUNX2;SCD5;SHOC2;SIX1;SKP2;SLC20A1;SLC35C1;SRC;TFRC;THBS1;TNFRSF1A;TSC1;UBE2I;VAPA;VCP;VEGFA;WNT7A;WT1;XYLT1;ZMPSTE24
DOID:0050624	gastrointestinal system benign neoplasm	http://www.ontobee.org/ontology/DOID?iri=http://purl.obolibrary.org/obo/DOID_0050624	7	47	0.0541748	0.471248	CALB2;CDKN2A;ERBB2;HIF1A;PDGFA;TNKS2;VEGFA
DOID:11123	Henoch-Schoenlein purpura	http://www.ontobee.org/ontology/DOID?iri=http://purl.obolibrary.org/obo/DOID_11123	4	20	0.0546212	0.471248	CAT;HGF;IGF1;VEGFA
DOID:1557	hypersensitivity reaction type III disease	http://www.ontobee.org/ontology/DOID?iri=http://purl.obolibrary.org/obo/DOID_1557	4	20	0.0546212	0.471248	CAT;HGF;IGF1;VEGFA
DOID:9809	hypersensitivity vasculitis	http://www.ontobee.org/ontology/DOID?iri=http://purl.obolibrary.org/obo/DOID_9809	4	20	0.0546212	0.471248	CAT;HGF;IGF1;VEGFA
DOID:5100	middle ear disease	http://www.ontobee.org/ontology/DOID?iri=http://purl.obolibrary.org/obo/DOID_5100	5	29	0.0577536	0.471248	ADAMTS13;BCL6;CDKN2A;IL6R;VEGFA
DOID:3770	pulmonary fibrosis	http://www.ontobee.org/ontology/DOID?iri=http://purl.obolibrary.org/obo/DOID_3770	13	111	0.0628481	0.471248	CCL18;CDKN2A;ERBB2;FGF7;FOSL2;GATA6;IGF1;IGFBP3;METAP2;SOCS1;STX2;VEGFA;YY1
DOID:1790	malignant mesothelioma	http://www.ontobee.org/ontology/DOID?iri=http://purl.obolibrary.org/obo/DOID_1790	6	39	0.0632174	0.471248	CDKN2A;HIF1A;KIT;SMAD2;VEGFA;WT1
DOID:0060100	musculoskeletal system cancer	http://www.ontobee.org/ontology/DOID?iri=http://purl.obolibrary.org/obo/DOID_0060100	40	427	0.0637775	0.471248	ACTR1A;BCL6;CCNE1;CDKN2A;EPHA2;ERBB2;ESR1;ETV6;F2RL3;F3;FUS;GAB1;HGF;HIF1A;IDH1;IGF1;IGF2BP2;IGFBP3;ITGA4;KIT;LPAR3;LYN;MAP2K4;MAP3K5;NCOA1;PDGFA;RARB;RUNX2;SIX1;SIX3;SMAD2;SNAI1;SOX9;SRC;TNFRSF1A;URGCP;VCP;VEGFA;WT1;YY1
DOID:0050739	autosomal genetic disease	http://www.ontobee.org/ontology/DOID?iri=http://purl.obolibrary.org/obo/DOID_0050739	50	550	0.0641508	0.471248	ABL1;ADRB1;BCL6;CALCR;CBL;CDK2;CDKN2A;DDIT4;EDNRA;ELF2;ERBB2;ESR1;FOXA1;FOXC1;GCLC;GTF2I;HERC2;HIF1A;HNRNPA1;HOXA5;IGF1;IGFBP3;IL6R;ITGA4;KCND3;KIT;LMO4;MAP3K1;NME1;NR3C1;PITX2;RARB;RBBP8;RHEB;SCD5;SHOC2;SIX1;SKP2;SLC20A1;SLC35C1;SRC;TFRC;TNFRSF1A;TSC1;UBE2I;VCP;VEGFA;WT1;XYLT1;ZMPSTE24
DOID:3744	cervical squamous cell carcinoma	http://www.ontobee.org/ontology/DOID?iri=http://purl.obolibrary.org/obo/DOID_3744	9	69	0.0645309	0.471248	CCNE1;CCNL1;CDKN2A;GRB10;SMAD2;SNAI1;SOCS3;ST6GAL1;WT1
DOID:12241	beta thalassemia	http://www.ontobee.org/ontology/DOID?iri=http://purl.obolibrary.org/obo/DOID_12241	3	13	0.0650616	0.471248	IGF1;ITGA4;TFRC
DOID:0050155	sensory system disease	http://www.ontobee.org/ontology/DOID?iri=http://purl.obolibrary.org/obo/DOID_0050155	54	601	0.0663523	0.471248	ACTC1;ADAM9;ADAMTS13;ADRB1;BCL6;BMP2K;CAT;CBL;CCNE1;CCNE2;CDK2;CDKN2A;COL8A1;CTNND2;EDNRA;EPHA2;ERBB2;ESR1;F3;FOXC1;GJA1;GTF2I;HGF;HIF1A;HNRNPA1;IGF1;IGFBP3;IL6R;KEAP1;KIT;MAP3K5;MDM1;MYO1C;NME1;PEX5;PITX2;RARB;RORA;RUNX2;SIRT1;SKP2;SLC4A10;SNRNP200;SOCS3;SOCS5;TEAD1;TGFB2;TNFRSF1A;TRIB2;TTR;VCP;VEGFA;WT1;ZEB1
DOID:11338	tetanus	http://www.ontobee.org/ontology/DOID?iri=http://purl.obolibrary.org/obo/DOID_11338	2	6	0.0664519	0.471248	IGF1;PRDM1
DOID:12169	carpal tunnel syndrome	http://www.ontobee.org/ontology/DOID?iri=http://purl.obolibrary.org/obo/DOID_12169	2	6	0.0664519	0.471248	ESR1;TTR
DOID:13138	acute proliferative glomerulonephritis	http://www.ontobee.org/ontology/DOID?iri=http://purl.obolibrary.org/obo/DOID_13138	2	6	0.0664519	0.471248	KIT;WT1
DOID:13139	crescentic glomerulonephritis	http://www.ontobee.org/ontology/DOID?iri=http://purl.obolibrary.org/obo/DOID_13139	2	6	0.0664519	0.471248	KIT;WT1
DOID:1657	ventricular septal defect	http://www.ontobee.org/ontology/DOID?iri=http://purl.obolibrary.org/obo/DOID_1657	2	6	0.0664519	0.471248	PITX2;VEGFA
DOID:573	nerve compression syndrome	http://www.ontobee.org/ontology/DOID?iri=http://purl.obolibrary.org/obo/DOID_573	2	6	0.0664519	0.471248	ESR1;TTR
DOID:1492	eye and adnexa disease	http://www.ontobee.org/ontology/DOID?iri=http://purl.obolibrary.org/obo/DOID_1492	50	552	0.0674933	0.471248	ACTC1;ADAM9;ADRB1;BMP2K;CAT;CBL;CCNE1;CCNE2;CDK2;CDKN2A;COL8A1;CTNND2;EDNRA;EPHA2;ERBB2;ESR1;F3;FOXC1;GJA1;GTF2I;HGF;HIF1A;HNRNPA1;IGF1;IGFBP3;KEAP1;KIT;MAP3K5;MDM1;NME1;PEX5;PITX2;RARB;RORA;RUNX2;SIRT1;SKP2;SLC4A10;SNRNP200;SOCS3;SOCS5;TEAD1;TGFB2;TNFRSF1A;TRIB2;TTR;VCP;VEGFA;WT1;ZEB1
DOID:11476	osteoporosis	http://www.ontobee.org/ontology/DOID?iri=http://purl.obolibrary.org/obo/DOID_11476	11	91	0.069088	0.471248	BMP2K;CA10;CALCR;ESR1;HGF;IGF1;IRS2;ITGA6;KIT;RUNX2;THBS1
DOID:3565	meningioma	http://www.ontobee.org/ontology/DOID?iri=http://purl.obolibrary.org/obo/DOID_3565	9	70	0.0694824	0.471248	CDKN2A;EPB41;ERBB2;ETV6;F3;FAP;JAK1;VEGFA;YWHAZ
DOID:0050687	cell type cancer	http://www.ontobee.org/ontology/DOID?iri=http://purl.obolibrary.org/obo/DOID_0050687	120	1449	0.0706144	0.471248	ACO1;ACTR1A;ADAM9;ALCAM;ARL4A;ATF1;ATOH1;BCL2L11;BECN1;CAT;CCKBR;CCND2;CCNE1;CCNL1;CDC25A;CDC25B;CDC42;CDK2;CDK8;CDKN2A;CKS1B;DBF4;DDIT4;DKK2;DNMT3A;EDNRA;EPHA2;ERBB2;ERG;ESR1;F3;FADD;FAP;FKBP5;FOXA2;FOXG1;FRZB;FUS;GAB1;GALNT3;GALR1;GDNF;GJA1;GNA13;GNAI2;GRB10;HGF;HIF1A;HIF1AN;HMG20B;HOXD9;HSP90AA1;IDH1;IDH2;IGF1;IGFBP3;IL6R;ITGA4;ITGA6;JAK1;KEAP1;KIT;LAMB3;LAT;LIF;LMO4;LYN;LYVE1;MAP2K4;MMP15;MTD…
DOID:11984	hypertrophic cardiomyopathy	http://www.ontobee.org/ontology/DOID?iri=http://purl.obolibrary.org/obo/DOID_11984	8	60	0.0709907	0.471248	ACTC1;ESR1;FHL1;GJA1;IGF1;IGFBP3;SLC25A3;TMEM70
DOID:576	proteinuria	http://www.ontobee.org/ontology/DOID?iri=http://purl.obolibrary.org/obo/DOID_576	8	60	0.0709907	0.471248	F3;HGF;PDE5A;PIGA;STAT4;THBS1;VEGFA;WT1
DOID:9835	refractive error	http://www.ontobee.org/ontology/DOID?iri=http://purl.obolibrary.org/obo/DOID_9835	7	50	0.0714108	0.471248	ACTC1;BMP2K;CBL;CTNND2;HGF;IGF1;RARB
DOID:1681	heart septal defect	http://www.ontobee.org/ontology/DOID?iri=http://purl.obolibrary.org/obo/DOID_1681	4	22	0.0735287	0.471248	ACTC1;PITX2;TLL1;VEGFA
DOID:0080011	bone resorption disease	http://www.ontobee.org/ontology/DOID?iri=http://purl.obolibrary.org/obo/DOID_0080011	11	92	0.0735491	0.471248	BMP2K;CA10;CALCR;ESR1;HGF;IGF1;IRS2;ITGA6;KIT;RUNX2;THBS1
DOID:10602	steatorrhea	http://www.ontobee.org/ontology/DOID?iri=http://purl.obolibrary.org/obo/DOID_10602	1	1	0.0735743	0.471248	LPL
DOID:12143	neurogenic bladder	http://www.ontobee.org/ontology/DOID?iri=http://purl.obolibrary.org/obo/DOID_12143	1	1	0.0735743	0.471248	CHRM2
DOID:13269	hereditary coproporphyria	http://www.ontobee.org/ontology/DOID?iri=http://purl.obolibrary.org/obo/DOID_13269	1	1	0.0735743	0.471248	CPOX
DOID:13994	cleidocranial dysplasia	http://www.ontobee.org/ontology/DOID?iri=http://purl.obolibrary.org/obo/DOID_13994	1	1	0.0735743	0.471248	RUNX2
DOID:14039	POEMS syndrome	http://www.ontobee.org/ontology/DOID?iri=http://purl.obolibrary.org/obo/DOID_14039	1	1	0.0735743	0.471248	VEGFA
DOID:14118	familial lipoprotein lipase deficiency	http://www.ontobee.org/ontology/DOID?iri=http://purl.obolibrary.org/obo/DOID_14118	1	1	0.0735743	0.471248	LPL
DOID:14365	systemic primary carnitine deficiency disease	http://www.ontobee.org/ontology/DOID?iri=http://purl.obolibrary.org/obo/DOID_14365	1	1	0.0735743	0.471248	SLC22A5
DOID:1687	neovascular glaucoma	http://www.ontobee.org/ontology/DOID?iri=http://purl.obolibrary.org/obo/DOID_1687	1	1	0.0735743	0.471248	VEGFA
DOID:2834	acquired polycythemia	http://www.ontobee.org/ontology/DOID?iri=http://purl.obolibrary.org/obo/DOID_2834	1	1	0.0735743	0.471248	CD177
DOID:3001	female reproductive endometrioid cancer	http://www.ontobee.org/ontology/DOID?iri=http://purl.obolibrary.org/obo/DOID_3001	1	1	0.0735743	0.471248	WT1
DOID:3263	piebaldism	http://www.ontobee.org/ontology/DOID?iri=http://purl.obolibrary.org/obo/DOID_3263	1	1	0.0735743	0.471248	KIT
DOID:3410	carotid artery thrombosis	http://www.ontobee.org/ontology/DOID?iri=http://purl.obolibrary.org/obo/DOID_3410	1	1	0.0735743	0.471248	DDAH1
DOID:3606	ovarian mucinous adenocarcinoma	http://www.ontobee.org/ontology/DOID?iri=http://purl.obolibrary.org/obo/DOID_3606	1	1	0.0735743	0.471248	VEGFA
DOID:3764	Denys-Drash syndrome	http://www.ontobee.org/ontology/DOID?iri=http://purl.obolibrary.org/obo/DOID_3764	1	1	0.0735743	0.471248	WT1
DOID:379	external ear disease	http://www.ontobee.org/ontology/DOID?iri=http://purl.obolibrary.org/obo/DOID_379	1	1	0.0735743	0.471248	VEGFA
DOID:4193	intracranial thrombosis	http://www.ontobee.org/ontology/DOID?iri=http://purl.obolibrary.org/obo/DOID_4193	1	1	0.0735743	0.471248	DDAH1
DOID:4232	extraosseous Ewing's sarcoma	http://www.ontobee.org/ontology/DOID?iri=http://purl.obolibrary.org/obo/DOID_4232	1	1	0.0735743	0.471248	CDKN2A
DOID:4447	cystoid macular edema	http://www.ontobee.org/ontology/DOID?iri=http://purl.obolibrary.org/obo/DOID_4447	1	1	0.0735743	0.471248	VEGFA
DOID:4661	multiple chemical sensitivity	http://www.ontobee.org/ontology/DOID?iri=http://purl.obolibrary.org/obo/DOID_4661	1	1	0.0735743	0.471248	CCKBR
DOID:4985	extraosseous Ewings sarcoma-primitive neuroepithelial tumor	http://www.ontobee.org/ontology/DOID?iri=http://purl.obolibrary.org/obo/DOID_4985	1	1	0.0735743	0.471248	CDKN2A
DOID:5289	uterus leiomyosarcoma	http://www.ontobee.org/ontology/DOID?iri=http://purl.obolibrary.org/obo/DOID_5289	1	1	0.0735743	0.471248	CDKN2A
DOID:5690	atypical lipomatous tumor	http://www.ontobee.org/ontology/DOID?iri=http://purl.obolibrary.org/obo/DOID_5690	1	1	0.0735743	0.471248	CDKN2A
DOID:6406	double outlet right ventricle	http://www.ontobee.org/ontology/DOID?iri=http://purl.obolibrary.org/obo/DOID_6406	1	1	0.0735743	0.471248	PITX2
DOID:7633	macular holes	http://www.ontobee.org/ontology/DOID?iri=http://purl.obolibrary.org/obo/DOID_7633	1	1	0.0735743	0.471248	VEGFA
DOID:905	Zellweger syndrome	http://www.ontobee.org/ontology/DOID?iri=http://purl.obolibrary.org/obo/DOID_905	1	1	0.0735743	0.471248	PEX5
DOID:9240	erythromelalgia	http://www.ontobee.org/ontology/DOID?iri=http://purl.obolibrary.org/obo/DOID_9240	1	1	0.0735743	0.471248	SCN9A
DOID:9254	mast-cell leukemia	http://www.ontobee.org/ontology/DOID?iri=http://purl.obolibrary.org/obo/DOID_9254	1	1	0.0735743	0.471248	KIT
DOID:9462	cholesteatoma of external ear	http://www.ontobee.org/ontology/DOID?iri=http://purl.obolibrary.org/obo/DOID_9462	1	1	0.0735743	0.471248	VEGFA
DOID:9463	otitis externa	http://www.ontobee.org/ontology/DOID?iri=http://purl.obolibrary.org/obo/DOID_9463	1	1	0.0735743	0.471248	VEGFA
DOID:1240	leukemia	http://www.ontobee.org/ontology/DOID?iri=http://purl.obolibrary.org/obo/DOID_1240	83	973	0.0741761	0.471248	ABL1;ATF1;BACH2;BCL2L10;BCL2L11;BCL6;BECN1;CBL;CCKBR;CCL18;CCND2;CCNE1;CDC42;CDKN2A;CRIM1;CRMP1;DNMT3A;EED;EPHA2;ERBB2;ERG;ESR1;ETV6;F3;FOSL2;FUS;GJA1;HGF;HIF1A;HLF;HNRNPA1;HOXA11;HRK;HSP90AA1;IDH1;IDH2;IGF1;IKZF2;IL21R;ITGA4;JAK1;KIT;KLF10;LIF;LPAR3;LPL;LYN;MAP3K5;MNT;MNX1;NKX2-2;NME1;NNAT;NR3C1;NRBP1;NRXN1;PDE4D;PICALM;PTPRG;RAB38;RARB;RARG;RCBTB1;REL;RUNX2;SHOC2;SKP2;SMAD2;SOCS1;SOCS3;SRC;ST3G…
DOID:0050615	respiratory system cancer	http://www.ontobee.org/ontology/DOID?iri=http://purl.obolibrary.org/obo/DOID_0050615	50	556	0.0745546	0.471248	ADAM12;BCL2L11;BHLHE40;CCNE1;CDC25B;CDC42;CDKN2A;CRMP1;DDIT4;DESI2;DLC1;EPHA2;ERBB2;ESR1;F3;FADD;GALNT3;GDNF;GJA1;HGF;HIF1A;HSP90AA1;IGF1;IGFBP3;KCNJ3;KCNJ3;KEAP1;KIT;LPL;MAP3K1;NEDD4;NME1;NNAT;NR3C1;PEA15;RARB;RASA1;RCHY1;SKP2;SMAD1;SOCS3;SOX9;SRC;UBE2I;USF2;VEGFA;WNT7A;WT1;YBX1;YY1
DOID:10747	lymphoid leukemia	http://www.ontobee.org/ontology/DOID?iri=http://purl.obolibrary.org/obo/DOID_10747	9	71	0.0746649	0.471248	ABL1;BACH2;CCL18;CCND2;FOSL2;HGF;LYN;SOCS1;VEGFA
DOID:5683	hereditary breast ovarian cancer	http://www.ontobee.org/ontology/DOID?iri=http://purl.obolibrary.org/obo/DOID_5683	21	205	0.0750245	0.471248	ABL1;CDK2;CDKN2A;ERBB2;ESR1;FOXA1;FOXC1;GTF2I;HERC2;HIF1A;HNRNPA1;HOXA5;IGF1;LMO4;MAP3K1;NME1;RARB;RBBP8;SKP2;UBE2I;VEGFA
DOID:10155	intestinal cancer	http://www.ontobee.org/ontology/DOID?iri=http://purl.obolibrary.org/obo/DOID_10155	27	276	0.0761004	0.475037	ATOH1;BCL2L11;CCKBR;CDKN2A;CYSLTR1;DLC1;ERBB2;HIF1A;HSP90AA1;IGF1;IGFBP3;ITGA6;MAP2K4;PTP4A1;PTP4A1;PTP4A3;PTPN13;RARB;SIRT1;SNAI1;SOX9;ST6GAL1;STAT5A;VEGFA;VIP;WT1;ZEB1
DOID:0060036	intrinsic cardiomyopathy	http://www.ontobee.org/ontology/DOID?iri=http://purl.obolibrary.org/obo/DOID_0060036	14	126	0.0781602	0.484883	ACTC1;ADORA1;ADRB1;CHRM2;EDNRA;ERBB2;ESR1;FHL1;GJA1;IGF1;IGFBP3;PGM1;SLC25A3;TMEM70
DOID:4450	renal cell carcinoma	http://www.ontobee.org/ontology/DOID?iri=http://purl.obolibrary.org/obo/DOID_4450	30	313	0.0789598	0.486838	ALCAM;BCL2L11;CDKN2A;CKS1B;DKK2;DLC1;EDNRA;EPHA2;ESR1;FADD;HGF;HIF1A;HIF1AN;HOXA5;IGF1;IGFBP3;JAK1;KEAP1;KIT;MTDH;PBRM1;PDGFA;RARB;SFPQ;SKP2;THBS1;TRPC4;VEGFA;WT1;ZFP36L1
DOID:263	kidney cancer	http://www.ontobee.org/ontology/DOID?iri=http://purl.obolibrary.org/obo/DOID_263	37	399	0.0815393	0.499677	ALCAM;BCL2L11;BTG3;CCNE1;CDKN2A;CKS1B;DKK2;DLC1;EDNRA;EPHA2;ERBB2;ESR1;FADD;FRZB;HGF;HIF1A;HIF1AN;HOXA5;HSP90AA1;IGF1;IGFBP3;JAK1;KEAP1;KIT;MTDH;PBRM1;PDGFA;RARB;SFPQ;SKP2;SOX9;THBS1;TRPC4;VEGFA;WT1;WTAP;ZFP36L1
DOID:0050177	monogenic disease	http://www.ontobee.org/ontology/DOID?iri=http://purl.obolibrary.org/obo/DOID_0050177	51	573	0.0831302	0.505461	ABL1;ADRB1;BCL6;CALCR;CBL;CDK2;CDKN2A;DDIT4;EDNRA;ELF2;ERBB2;ESR1;FOXA1;FOXC1;GCLC;GTF2I;HERC2;HIF1A;HNRNPA1;HOXA5;IGF1;IGFBP3;IL6R;ITGA4;KCND3;KIT;LMO4;MAP3K1;NME1;NR3C1;PITX2;RARB;RBBP8;RHEB;SCD5;SHOC2;SIX1;SKP2;SLC20A1;SLC35C1;SRC;TFRC;TNFRSF1A;TSC1;UBE2I;VCP;VEGFA;WNT7A;WT1;XYLT1;ZMPSTE24
DOID:5183	hereditary Wilms' tumor	http://www.ontobee.org/ontology/DOID?iri=http://purl.obolibrary.org/obo/DOID_5183	7	52	0.0845185	0.505461	CCNE1;ERBB2;ESR1;HSP90AA1;KIT;SOX9;WT1
DOID:0050700	cardiomyopathy	http://www.ontobee.org/ontology/DOID?iri=http://purl.obolibrary.org/obo/DOID_0050700	15	139	0.0852424	0.505461	ACTC1;ADORA1;ADRB1;CHRM2;EDNRA;ERBB2;ESR1;F3;FHL1;GJA1;IGF1;IGFBP3;PGM1;SLC25A3;TMEM70
DOID:3312	bipolar disorder	http://www.ontobee.org/ontology/DOID?iri=http://purl.obolibrary.org/obo/DOID_3312	15	139	0.0852424	0.505461	ATF5;ATF5;BHLHE40;CHRM2;DGKZ;DISC1;ESR1;FKBP5;GABRA5;HCAR3;NR3C1;NTNG1;SLC18A2;SLC6A5;VAPA
DOID:2154	nephroblastoma	http://www.ontobee.org/ontology/DOID?iri=http://purl.obolibrary.org/obo/DOID_2154	9	73	0.0857262	0.505461	CCNE1;ERBB2;ESR1;HGF;HSP90AA1;KIT;SOX9;WT1;WTAP
DOID:10873	Kuhnt-Junius degeneration	http://www.ontobee.org/ontology/DOID?iri=http://purl.obolibrary.org/obo/DOID_10873	2	7	0.0886042	0.505461	RORA;VEGFA
DOID:11294	arteriovenous malformation	http://www.ontobee.org/ontology/DOID?iri=http://purl.obolibrary.org/obo/DOID_11294	2	7	0.0886042	0.505461	PDGFA;VEGFA
DOID:11801	protein-energy malnutrition	http://www.ontobee.org/ontology/DOID?iri=http://purl.obolibrary.org/obo/DOID_11801	2	7	0.0886042	0.505461	CDKN2A;IGF1
DOID:12351	alcoholic hepatitis	http://www.ontobee.org/ontology/DOID?iri=http://purl.obolibrary.org/obo/DOID_12351	2	7	0.0886042	0.505461	HGF;TNFRSF1A
DOID:12700	hyperprolactinemia	http://www.ontobee.org/ontology/DOID?iri=http://purl.obolibrary.org/obo/DOID_12700	2	7	0.0886042	0.505461	ERBB2;LPL
DOID:13099	Moyamoya disease	http://www.ontobee.org/ontology/DOID?iri=http://purl.obolibrary.org/obo/DOID_13099	2	7	0.0886042	0.505461	HGF;TTR
DOID:869	cholesteatoma	http://www.ontobee.org/ontology/DOID?iri=http://purl.obolibrary.org/obo/DOID_869	2	7	0.0886042	0.505461	CDKN2A;VEGFA
DOID:3371	chondrosarcoma	http://www.ontobee.org/ontology/DOID?iri=http://purl.obolibrary.org/obo/DOID_3371	8	63	0.0890215	0.505461	CDKN2A;ETV6;F2RL3;HIF1A;RUNX2;SIX3;SOX9;VEGFA
DOID:4251	conjunctival disease	http://www.ontobee.org/ontology/DOID?iri=http://purl.obolibrary.org/obo/DOID_4251	5	33	0.0910643	0.513069	F3;SKP2;SOCS3;SOCS5;VEGFA
DOID:0060040	pervasive developmental disorder	http://www.ontobee.org/ontology/DOID?iri=http://purl.obolibrary.org/obo/DOID_0060040	18	175	0.0914249	0.513069	DISC1;DLX2;DOCK4;FOXG1;GABRA5;GABRB1;GJA1;GRIA2;HGF;HOXA1;ITGA4;NRXN1;NTNG1;PRPF40A;SCN1A;STK39;TSC1;VEGFA
DOID:0060101	benign glioma	http://www.ontobee.org/ontology/DOID?iri=http://purl.obolibrary.org/obo/DOID_0060101	3	15	0.092914	0.513069	CDKN2A;ERBB2;SOX9
DOID:3457	invasive lobular carcinoma	http://www.ontobee.org/ontology/DOID?iri=http://purl.obolibrary.org/obo/DOID_3457	3	15	0.092914	0.513069	ERBB2;ESR1;HSP90AA1
DOID:4844	benign ependymoma	http://www.ontobee.org/ontology/DOID?iri=http://purl.obolibrary.org/obo/DOID_4844	3	15	0.092914	0.513069	CDKN2A;ERBB2;SOX9
DOID:4468	clear cell adenocarcinoma	http://www.ontobee.org/ontology/DOID?iri=http://purl.obolibrary.org/obo/DOID_4468	4	24	0.0953056	0.523399	ATF1;HIF1A;PDGFA;VEGFA
DOID:633	myositis	http://www.ontobee.org/ontology/DOID?iri=http://purl.obolibrary.org/obo/DOID_633	9	75	0.0977156	0.532339	ACVR1;BACE1;HGF;IGF1;IGFBP3;IL1RAPL2;NR3C1;THBS1;VEGFA
DOID:332	amyotrophic lateral sclerosis	http://www.ontobee.org/ontology/DOID?iri=http://purl.obolibrary.org/obo/DOID_332	15	142	0.0979927	0.532339	FUS;GRIA2;HGF;IGF1;IGFBP3;PON2;PON2;RRAD;RRAD;SMAD2;TMEM106B;TNFRSF1A;VAPA;VCP;VEGFA
DOID:1206	Rett syndrome	http://www.ontobee.org/ontology/DOID?iri=http://purl.obolibrary.org/obo/DOID_1206	3	16	0.108386	0.566245	FOXG1;NTNG1;PRPF40A
DOID:12205	dengue disease	http://www.ontobee.org/ontology/DOID?iri=http://purl.obolibrary.org/obo/DOID_12205	3	16	0.108386	0.566245	F3;JAK1;VEGFA
DOID:4451	renal carcinoma	http://www.ontobee.org/ontology/DOID?iri=http://purl.obolibrary.org/obo/DOID_4451	32	348	0.108644	0.566245	ALCAM;BCL2L11;BTG3;CDKN2A;CKS1B;DKK2;DLC1;EDNRA;EPHA2;ESR1;FADD;FRZB;HGF;HIF1A;HIF1AN;HOXA5;IGF1;IGFBP3;JAK1;KEAP1;KIT;MTDH;PBRM1;PDGFA;RARB;SFPQ;SKP2;THBS1;TRPC4;VEGFA;WT1;ZFP36L1
DOID:1037	lymphoblastic leukemia	http://www.ontobee.org/ontology/DOID?iri=http://purl.obolibrary.org/obo/DOID_1037	35	385	0.108824	0.566245	ABL1;BACH2;BCL2L11;CCL18;CCND2;CDKN2A;DNMT3A;EPHA2;ERG;ETV6;FOSL2;FUS;HGF;HLF;HOXA11;HSP90AA1;IKZF2;IL21R;ITGA4;JAK1;LPL;LYN;MNX1;NKX2-2;NRXN1;PDE4D;RCBTB1;SMAD2;SOCS1;TFRC;TNFAIP3;TNFRSF1A;VEGFA;WT1;ZFP36L1
DOID:1520	colon carcinoma	http://www.ontobee.org/ontology/DOID?iri=http://purl.obolibrary.org/obo/DOID_1520	16	156	0.109025	0.566245	BCL2L11;CYSLTR1;HIF1A;IGFBP3;ITGA6;PTP4A1;PTP4A1;PTP4A3;PTPN13;SIRT1;SNAI1;SOX9;ST6GAL1;STAT5A;VEGFA;ZEB1
DOID:171	neuroectodermal tumor	http://www.ontobee.org/ontology/DOID?iri=http://purl.obolibrary.org/obo/DOID_171	16	156	0.109025	0.566245	CDKN2A;ERBB2;ERG;FOXG1;FRZB;HGF;HIF1A;IGF1;KIT;LIF;NKX2-2;PDGFC;SKP2;SOX4;THBS1;WT1
DOID:9973	substance dependence	http://www.ontobee.org/ontology/DOID?iri=http://purl.obolibrary.org/obo/DOID_9973	6	45	0.109732	0.566245	KCND3;KCNJ2;SCN1A;SLC6A1;SLC6A9;TNKS2
DOID:114	heart disease	http://www.ontobee.org/ontology/DOID?iri=http://purl.obolibrary.org/obo/DOID_114	41	460	0.110258	0.566245	ACTC1;ACVR1;ADAMTS13;ADORA1;ADRB1;CDKN2A;CHRM2;EDNRA;ERBB2;ESR1;F3;FHL1;FOXC1;GATA6;GATM;GJA1;HGF;HIF1A;HNF1A;IGF1;IGFBP3;JARID2;KCND3;KIT;LPL;PDE5A;PGM1;PITX2;PON2;PON2;SLC25A3;STAT4;THBD;THBS1;TLL1;TMEM70;TNFRSF1A;TTR;VEGFA;YY1;ZNF202
DOID:3298	vaccinia	http://www.ontobee.org/ontology/DOID?iri=http://purl.obolibrary.org/obo/DOID_3298	5	35	0.110742	0.566245	BCL2L11;ERBB2;GOLGA1;GRB2;YY1
DOID:0050728	glycogen metabolism disorder	http://www.ontobee.org/ontology/DOID?iri=http://purl.obolibrary.org/obo/DOID_0050728	2	8	0.112553	0.566245	KCNJ3;KCNJ3
DOID:2345	plasma protein metabolism disease	http://www.ontobee.org/ontology/DOID?iri=http://purl.obolibrary.org/obo/DOID_2345	2	8	0.112553	0.566245	ITGA4;KIT
DOID:2747	glycogen storage disease	http://www.ontobee.org/ontology/DOID?iri=http://purl.obolibrary.org/obo/DOID_2747	2	8	0.112553	0.566245	KCNJ3;KCNJ3
DOID:582	hemoglobinuria	http://www.ontobee.org/ontology/DOID?iri=http://purl.obolibrary.org/obo/DOID_582	2	8	0.112553	0.566245	PIGA;WT1
DOID:9840	esotropia	http://www.ontobee.org/ontology/DOID?iri=http://purl.obolibrary.org/obo/DOID_9840	2	8	0.112553	0.566245	CBL;IGF1
DOID:10286	prostate carcinoma	http://www.ontobee.org/ontology/DOID?iri=http://purl.obolibrary.org/obo/DOID_10286	12	111	0.113993	0.566245	DLC1;EPHA2;ERBB2;ESR1;ETV6;F3;HGF;IGF1;MMP15;SRC;VEGFA;VIM
DOID:10124	corneal disease	http://www.ontobee.org/ontology/DOID?iri=http://purl.obolibrary.org/obo/DOID_10124	7	57	0.122844	0.566245	CAT;COL8A1;F3;PITX2;SKP2;TGFB2;VEGFA
DOID:6039	uveal melanoma	http://www.ontobee.org/ontology/DOID?iri=http://purl.obolibrary.org/obo/DOID_6039	3	17	0.124773	0.566245	CDKN2A;HSP90AA1;KIT
DOID:2043	hepatitis B	http://www.ontobee.org/ontology/DOID?iri=http://purl.obolibrary.org/obo/DOID_2043	18	183	0.124969	0.566245	CDKN2A;DLC1;DNMT3A;ESR1;FNDC3B;FOXA2;HIF1A;HNF1A;HSP90AA1;IL6R;IRS2;NEDD4;SKP2;SOCS1;SOCS3;SRC;TIA1;TNFRSF1A
DOID:5672	large intestine cancer	http://www.ontobee.org/ontology/DOID?iri=http://purl.obolibrary.org/obo/DOID_5672	25	268	0.127843	0.566245	ATOH1;BCL2L11;CCKBR;CDKN2A;CYSLTR1;DLC1;HIF1A;HSP90AA1;IGF1;IGFBP3;ITGA6;MAP2K4;PTP4A1;PTP4A1;PTP4A3;PTPN13;RARB;SIRT1;SNAI1;SOX9;ST6GAL1;STAT5A;VEGFA;WT1;ZEB1
DOID:9256	colorectal cancer	http://www.ontobee.org/ontology/DOID?iri=http://purl.obolibrary.org/obo/DOID_9256	25	268	0.127843	0.566245	ATOH1;BCL2L11;CCKBR;CDKN2A;CYSLTR1;DLC1;HIF1A;HSP90AA1;IGF1;IGFBP3;ITGA6;MAP2K4;PTP4A1;PTP4A1;PTP4A3;PTPN13;RARB;SIRT1;SNAI1;SOX9;ST6GAL1;STAT5A;VEGFA;WT1;ZEB1
DOID:3910	lung adenocarcinoma	http://www.ontobee.org/ontology/DOID?iri=http://purl.obolibrary.org/obo/DOID_3910	16	160	0.128153	0.566245	ADAM12;BHLHE40;CCNE1;CDKN2A;CRMP1;DESI2;ERBB2;ESR1;FADD;GALNT3;HGF;HIF1A;LPL;NNAT;SOX9;VEGFA
DOID:3376	bone osteosarcoma	http://www.ontobee.org/ontology/DOID?iri=http://purl.obolibrary.org/obo/DOID_3376	6	47	0.128293	0.566245	CDKN2A;IGF1;ITGA4;KIT;MAP2K4;RUNX2
DOID:0060085	organ system benign neoplasm	http://www.ontobee.org/ontology/DOID?iri=http://purl.obolibrary.org/obo/DOID_0060085	23	244	0.129088	0.566245	CALB2;CDKN2A;ERBB2;ESR1;FGF7;GJA1;HIF1A;IGF1;IGFBP3;KIT;KLF11;LIF;NEUROD1;NME1;NNAT;PDGFA;RHEB;SEMA3A;SOX9;TNKS2;VEGFA;WNT7A;WT1
DOID:5409	lung small cell carcinoma	http://www.ontobee.org/ontology/DOID?iri=http://purl.obolibrary.org/obo/DOID_5409	8	69	0.132267	0.566245	CDKN2A;DLC1;ERBB2;KIT;NR3C1;SKP2;VEGFA;WNT7A
DOID:10923	sickle cell anemia	http://www.ontobee.org/ontology/DOID?iri=http://purl.obolibrary.org/obo/DOID_10923	5	37	0.13229	0.566245	IGF1;IGFBP3;ITGA4;SCD5;TNFRSF1A
DOID:684	hepatocellular carcinoma	http://www.ontobee.org/ontology/DOID?iri=http://purl.obolibrary.org/obo/DOID_684	65	774	0.133878	0.566245	ACO1;ADAM9;ADAMTS13;ATF5;ATF5;BECN1;CAT;CCNE1;CDC25A;CDC42;CDK2;CDKN2A;CKS1B;DLC1;DNMT3A;DPT;EPHA7;ERBB2;ESR1;F2RL3;FER;FNDC3B;FOXA2;GJA1;HGF;HIF1A;HNF1A;IGF1;IGFBP3;IL6R;JAK1;KIT;LYVE1;MIA3;MTDH;MYBL2;NR4A2;PEA15;PTP4A3;RAD23B;RARB;RCHY1;SIAH1;SIX1;SKP2;SLC35C1;SMAD2;SNAI1;SOCS1;SOCS3;SOX17;SOX4;SRC;TFRC;THBD;THBS1;TNFRSF1A;URGCP;USF2;VCP;VEGFA;VEGFB;VIM;WT1;YWHAZ
DOID:686	liver carcinoma	http://www.ontobee.org/ontology/DOID?iri=http://purl.obolibrary.org/obo/DOID_686	65	774	0.133878	0.566245	ACO1;ADAM9;ADAMTS13;ATF5;ATF5;BECN1;CAT;CCNE1;CDC25A;CDC42;CDK2;CDKN2A;CKS1B;DLC1;DNMT3A;DPT;EPHA7;ERBB2;ESR1;F2RL3;FER;FNDC3B;FOXA2;GJA1;HGF;HIF1A;HNF1A;IGF1;IGFBP3;IL6R;JAK1;KIT;LYVE1;MIA3;MTDH;MYBL2;NR4A2;PEA15;PTP4A3;RAD23B;RARB;RCHY1;SIAH1;SIX1;SKP2;SLC35C1;SMAD2;SNAI1;SOCS1;SOCS3;SOX17;SOX4;SRC;TFRC;THBD;THBS1;TNFRSF1A;URGCP;USF2;VCP;VEGFA;VEGFB;VIM;WT1;YWHAZ
DOID:0060099	musculoskeletal system benign neoplasm	http://www.ontobee.org/ontology/DOID?iri=http://purl.obolibrary.org/obo/DOID_0060099	2	9	0.137916	0.566245	PDGFA;WT1
DOID:14175	von Hippel-Lindau disease	http://www.ontobee.org/ontology/DOID?iri=http://purl.obolibrary.org/obo/DOID_14175	2	9	0.137916	0.566245	HIF1A;SLC18A2
DOID:2566	corneal dystrophy	http://www.ontobee.org/ontology/DOID?iri=http://purl.obolibrary.org/obo/DOID_2566	2	9	0.137916	0.566245	CAT;PITX2
DOID:4233	clear cell sarcoma	http://www.ontobee.org/ontology/DOID?iri=http://purl.obolibrary.org/obo/DOID_4233	2	9	0.137916	0.566245	ATF1;KIT
DOID:461	muscle benign neoplasm	http://www.ontobee.org/ontology/DOID?iri=http://purl.obolibrary.org/obo/DOID_461	2	9	0.137916	0.566245	PDGFA;WT1
DOID:5394	prolactinoma	http://www.ontobee.org/ontology/DOID?iri=http://purl.obolibrary.org/obo/DOID_5394	2	9	0.137916	0.566245	ERBB2;LIF
DOID:8584	Burkitt lymphoma	http://www.ontobee.org/ontology/DOID?iri=http://purl.obolibrary.org/obo/DOID_8584	2	9	0.137916	0.566245	BCL2L11;BCL6
DOID:1485	cystic fibrosis	http://www.ontobee.org/ontology/DOID?iri=http://purl.obolibrary.org/obo/DOID_1485	13	127	0.14008	0.566245	ADRB1;CALCR;EDNRA;ELF2;GCLC;HIF1A;IGF1;IGFBP3;IL6R;NME1;NR3C1;TNFRSF1A;VCP
DOID:0050829	pericardium disease	http://www.ontobee.org/ontology/DOID?iri=http://purl.obolibrary.org/obo/DOID_0050829	1	2	0.141746	0.566245	TNFRSF1A
DOID:10047	nodular malignant melanoma	http://www.ontobee.org/ontology/DOID?iri=http://purl.obolibrary.org/obo/DOID_10047	1	2	0.141746	0.566245	SKP2
DOID:13374	fibrodysplasia ossificans progressiva	http://www.ontobee.org/ontology/DOID?iri=http://purl.obolibrary.org/obo/DOID_13374	1	2	0.141746	0.566245	ACVR1
DOID:14472	hantavirus pulmonary syndrome	http://www.ontobee.org/ontology/DOID?iri=http://purl.obolibrary.org/obo/DOID_14472	1	2	0.141746	0.566245	VEGFA
DOID:172	clear cell acanthoma	http://www.ontobee.org/ontology/DOID?iri=http://purl.obolibrary.org/obo/DOID_172	1	2	0.141746	0.566245	FGF7
DOID:174	acanthoma	http://www.ontobee.org/ontology/DOID?iri=http://purl.obolibrary.org/obo/DOID_174	1	2	0.141746	0.566245	FGF7
DOID:1787	pericarditis	http://www.ontobee.org/ontology/DOID?iri=http://purl.obolibrary.org/obo/DOID_1787	1	2	0.141746	0.566245	TNFRSF1A
DOID:1962	fallopian tube disease	http://www.ontobee.org/ontology/DOID?iri=http://purl.obolibrary.org/obo/DOID_1962	1	2	0.141746	0.566245	LIF
DOID:1984	rectal neoplasm	http://www.ontobee.org/ontology/DOID?iri=http://purl.obolibrary.org/obo/DOID_1984	1	2	0.141746	0.566245	VEGFA
DOID:2053	reactive cutaneous fibrous lesion	http://www.ontobee.org/ontology/DOID?iri=http://purl.obolibrary.org/obo/DOID_2053	1	2	0.141746	0.566245	TSC1
DOID:2280	hidradenitis suppurativa	http://www.ontobee.org/ontology/DOID?iri=http://purl.obolibrary.org/obo/DOID_2280	1	2	0.141746	0.566245	PGP
DOID:2282	hidradenitis	http://www.ontobee.org/ontology/DOID?iri=http://purl.obolibrary.org/obo/DOID_2282	1	2	0.141746	0.566245	PGP
DOID:3071	gliosarcoma	http://www.ontobee.org/ontology/DOID?iri=http://purl.obolibrary.org/obo/DOID_3071	1	2	0.141746	0.566245	KIT
DOID:3145	hyperlipoproteinemia type III	http://www.ontobee.org/ontology/DOID?iri=http://purl.obolibrary.org/obo/DOID_3145	1	2	0.141746	0.566245	LPL
DOID:4545	mesenchymal chondrosarcoma	http://www.ontobee.org/ontology/DOID?iri=http://purl.obolibrary.org/obo/DOID_4545	1	2	0.141746	0.566245	SOX9
DOID:4906	small intestine adenocarcinoma	http://www.ontobee.org/ontology/DOID?iri=http://purl.obolibrary.org/obo/DOID_4906	1	2	0.141746	0.566245	ERBB2
DOID:4907	small intestine carcinoma	http://www.ontobee.org/ontology/DOID?iri=http://purl.obolibrary.org/obo/DOID_4907	1	2	0.141746	0.566245	ERBB2
DOID:5363	myxoid liposarcoma	http://www.ontobee.org/ontology/DOID?iri=http://purl.obolibrary.org/obo/DOID_5363	1	2	0.141746	0.566245	FUS
DOID:5702	pleomorphic liposarcoma	http://www.ontobee.org/ontology/DOID?iri=http://purl.obolibrary.org/obo/DOID_5702	1	2	0.141746	0.566245	FUS
DOID:5733	salpingitis	http://www.ontobee.org/ontology/DOID?iri=http://purl.obolibrary.org/obo/DOID_5733	1	2	0.141746	0.566245	LIF
DOID:646	viral encephalitis	http://www.ontobee.org/ontology/DOID?iri=http://purl.obolibrary.org/obo/DOID_646	1	2	0.141746	0.566245	VEGFA
DOID:6846	familial melanoma	http://www.ontobee.org/ontology/DOID?iri=http://purl.obolibrary.org/obo/DOID_6846	1	2	0.141746	0.566245	CDKN2A
DOID:6873	skin tag	http://www.ontobee.org/ontology/DOID?iri=http://purl.obolibrary.org/obo/DOID_6873	1	2	0.141746	0.566245	TSC1
DOID:7442	monoclonal gammopathy of uncertain significance	http://www.ontobee.org/ontology/DOID?iri=http://purl.obolibrary.org/obo/DOID_7442	1	2	0.141746	0.566245	KIT
DOID:749	active peptic ulcer disease	http://www.ontobee.org/ontology/DOID?iri=http://purl.obolibrary.org/obo/DOID_749	1	2	0.141746	0.566245	VEGFA
DOID:8675	lymphosarcoma	http://www.ontobee.org/ontology/DOID?iri=http://purl.obolibrary.org/obo/DOID_8675	1	2	0.141746	0.566245	PRDM1
DOID:1752	ocular melanoma	http://www.ontobee.org/ontology/DOID?iri=http://purl.obolibrary.org/obo/DOID_1752	3	18	0.141984	0.566245	CDKN2A;HSP90AA1;KIT
DOID:2730	epidermolysis bullosa	http://www.ontobee.org/ontology/DOID?iri=http://purl.obolibrary.org/obo/DOID_2730	3	18	0.141984	0.566245	IGFBP3;LAMB3;VIM
DOID:3302	chordoma	http://www.ontobee.org/ontology/DOID?iri=http://purl.obolibrary.org/obo/DOID_3302	3	18	0.141984	0.566245	CDKN2A;HIF1A;VEGFA
DOID:3303	notochordal cancer	http://www.ontobee.org/ontology/DOID?iri=http://purl.obolibrary.org/obo/DOID_3303	3	18	0.141984	0.566245	CDKN2A;HIF1A;VEGFA
DOID:706	mature B-cell neoplasm	http://www.ontobee.org/ontology/DOID?iri=http://purl.obolibrary.org/obo/DOID_706	3	18	0.141984	0.566245	BCL2L11;BCL6;KIT
DOID:707	B-cell lymphoma	http://www.ontobee.org/ontology/DOID?iri=http://purl.obolibrary.org/obo/DOID_707	3	18	0.141984	0.566245	BCL2L11;BCL6;KIT
DOID:120	female reproductive organ cancer	http://www.ontobee.org/ontology/DOID?iri=http://purl.obolibrary.org/obo/DOID_120	37	421	0.143222	0.56819	ALCAM;BECN1;CCL18;CCNE1;CCNL1;CDKN2A;CHL1;EDNRA;ERBB2;ESR1;GRB10;HIF1A;IGF1;IGFBP3;KIT;LIF;LIN28A;MTDH;NME1;RARB;RORA;SKP2;SMAD2;SNAI1;SOCS3;SRC;ST3GAL5;ST6GAL1;TGFB2;THBS1;TNFRSF1A;TPT1;USP2;VEGFA;WT1;YBX1;YWHAZ
DOID:5157	benign pleural mesothelioma	http://www.ontobee.org/ontology/DOID?iri=http://purl.obolibrary.org/obo/DOID_5157	5	38	0.143719	0.56819	ACTR1A;CDKN2A;PEA15;SRC;VEGFA
DOID:3498	pancreatic ductal adenocarcinoma	http://www.ontobee.org/ontology/DOID?iri=http://purl.obolibrary.org/obo/DOID_3498	10	93	0.144168	0.56819	BTF3;EPHA2;EPHA7;ERBB2;F3;GALNT3;HGF;HIF1A;ITGA6;SOCS3
DOID:2237	hepatitis	http://www.ontobee.org/ontology/DOID?iri=http://purl.obolibrary.org/obo/DOID_2237	34	384	0.14525	0.570219	ADAMTS13;CBL;CDKN2A;CSNK1A1;DDX5;DFFA;DLC1;DNMT3A;ESR1;FADD;FAP;FNDC3B;FOXA2;GRB2;HGF;HIF1A;HNF1A;HSP90AA1;IGF1;IL1RAPL2;IL6R;IRS2;JAK1;NEDD4;SFPQ;SKP2;SOCS1;SOCS3;SRC;THBS1;TIA1;TNFRSF1A;VEGFA;VIM
DOID:4610	intestinal benign neoplasm	http://www.ontobee.org/ontology/DOID?iri=http://purl.obolibrary.org/obo/DOID_4610	4	28	0.146558	0.573115	CALB2;HIF1A;TNKS2;VEGFA
DOID:3454	brain infarction	http://www.ontobee.org/ontology/DOID?iri=http://purl.obolibrary.org/obo/DOID_3454	7	60	0.149451	0.582163	F3;HGF;IGFBP3;LPL;NR3C1;PDE4D;THBD
DOID:3119	gastrointestinal system cancer	http://www.ontobee.org/ontology/DOID?iri=http://purl.obolibrary.org/obo/DOID_3119	91	1120	0.153155	0.59341	ACO1;ADAM9;ADAMTS13;ATF5;ATF5;ATOH1;BCL2L11;BCL6;BECN1;CAT;CCKBR;CCND2;CCNE1;CDC25A;CDC42;CDK2;CDK8;CDKN2A;CKS1B;CYSLTR1;DLC1;DNMT3A;DPT;EPHA2;EPHA7;ERBB2;ESR1;F2RL3;FER;FNDC3B;FOXA2;GJA1;HGF;HIF1A;HNF1A;HSP90AA1;IGF1;IGFBP3;IL6R;ITGA4;ITGA6;JAK1;KIT;LAMB3;LYVE1;MAP2K4;MIA3;MTDH;MYBL2;NME1;NR4A2;PEA15;PTP4A1;PTP4A1;PTP4A3;PTPN13;PTPRG;RAD23B;RARB;RCHY1;RNF34;SIAH1;SIRT1;SIX1;SKP2;SLC35C1;SMAD2;SN…
DOID:150	disease of mental health	http://www.ontobee.org/ontology/DOID?iri=http://purl.obolibrary.org/obo/DOID_150	97	1199	0.153952	0.59341	ABL1;ADAM12;ADAMTS13;ADORA1;ADRA2A;ADRB1;ATF5;ATF5;ATPAF2;BACE1;BHLHE40;CCKBR;CDC42EP3;CDKN2A;CHL1;CHRM2;DDAH1;DDIT4;DGCR2;DGKZ;DISC1;DLX2;DOCK4;ERG;ERLIN1;ESR1;FKBP5;FOXG1;FUS;GABRA5;GABRB1;GCLC;GDNF;GJA1;GLDC;GLUD1;GRB2;GRIA2;GTF2I;GULP1;HCAR3;HGF;HOXA1;HSP90AA1;IGF1;IL6R;IPO5;ITGA4;ITSN1;JARID2;KCND3;KCNJ2;KIF17;LHX5;LPL;NDEL1;NEDD9;NEFM;NR1H2;NR3C1;NR4A2;NRXN1;NRXN3;NSDHL;NTNG1;PEA15;PFKM;PIC…
DOID:3571	liver cancer	http://www.ontobee.org/ontology/DOID?iri=http://purl.obolibrary.org/obo/DOID_3571	65	783	0.156488	0.59341	ACO1;ADAM9;ADAMTS13;ATF5;ATF5;BECN1;CAT;CCNE1;CDC25A;CDC42;CDK2;CDKN2A;CKS1B;DLC1;DNMT3A;DPT;EPHA7;ERBB2;ESR1;F2RL3;FER;FNDC3B;FOXA2;GJA1;HGF;HIF1A;HNF1A;IGF1;IGFBP3;IL6R;JAK1;KIT;LYVE1;MIA3;MTDH;MYBL2;NR4A2;PEA15;PTP4A3;RAD23B;RARB;RCHY1;SIAH1;SIX1;SKP2;SLC35C1;SMAD2;SNAI1;SOCS1;SOCS3;SOX17;SOX4;SRC;TFRC;THBD;THBS1;TNFRSF1A;URGCP;USF2;VCP;VEGFA;VEGFB;VIM;WT1;YWHAZ
DOID:1036	chronic leukemia	http://www.ontobee.org/ontology/DOID?iri=http://purl.obolibrary.org/obo/DOID_1036	27	300	0.157522	0.59341	ABL1;BCL2L11;BCL6;CBL;CDC42;CDKN2A;EPHA2;HOXA11;HSP90AA1;IL21R;ITGA4;KIT;LPAR3;LPL;LYN;PDE4D;RAB38;RCBTB1;REL;SKP2;SOCS3;STAT5A;TFRC;TNFAIP3;VEGFA;WT1;ZFP36L1
DOID:219	colon cancer	http://www.ontobee.org/ontology/DOID?iri=http://purl.obolibrary.org/obo/DOID_219	24	263	0.157952	0.59341	ATOH1;BCL2L11;CCKBR;CDKN2A;CYSLTR1;DLC1;HIF1A;HSP90AA1;IGF1;IGFBP3;ITGA6;MAP2K4;PTP4A1;PTP4A1;PTP4A3;PTPN13;RARB;SIRT1;SNAI1;SOX9;ST6GAL1;STAT5A;VEGFA;ZEB1
DOID:2731	vesiculobullous skin disease	http://www.ontobee.org/ontology/DOID?iri=http://purl.obolibrary.org/obo/DOID_2731	3	19	0.159927	0.59341	IGFBP3;LAMB3;VIM
DOID:4074	pancreas adenocarcinoma	http://www.ontobee.org/ontology/DOID?iri=http://purl.obolibrary.org/obo/DOID_4074	15	154	0.160136	0.59341	BTF3;CDKN2A;EPHA2;EPHA7;ERBB2;F3;FAP;GALNT3;HGF;HIF1A;IGF1;ITGA6;KIT;SOCS3;THBS1
DOID:678	progressive supranuclear palsy	http://www.ontobee.org/ontology/DOID?iri=http://purl.obolibrary.org/obo/DOID_678	2	10	0.164356	0.59341	CHRM2;VEGFA
DOID:0080005	bone remodeling disease	http://www.ontobee.org/ontology/DOID?iri=http://purl.obolibrary.org/obo/DOID_0080005	13	131	0.165148	0.59341	BMP2K;CA10;CALCR;ESR1;HGF;IGF1;IRS2;ITGA6;KIT;PLEK;RUNX2;THBS1;VCP
DOID:934	viral infectious disease	http://www.ontobee.org/ontology/DOID?iri=http://purl.obolibrary.org/obo/DOID_934	55	658	0.167766	0.59341	ADAMTS13;BACH2;BCL2L11;CBL;CCL18;CDKN2A;CPSF4;CSNK1A1;DDX5;DFFA;DLC1;DNMT3A;ERBB2;ESR1;F3;FAP;FNDC3B;FOXA2;FUCA1;GOLGA1;GRB2;HIF1A;HNF1A;HNRNPF;HSP90AA1;IDH1;IGF1;IL1RAPL2;IL6R;IPO5;IRS2;ITGA4;JAK1;KPNB1;LAMB3;MAP3K5;NEDD4;NR3C1;PITX2;PSMD7;RBBP8;RNF4;SIRT1;SKP2;SOCS1;SOCS3;SRC;THBS1;TIA1;TNFRSF1A;UBE2I;VEGFA;VIM;YBX1;YY1
DOID:0060095	uterine benign neoplasm	http://www.ontobee.org/ontology/DOID?iri=http://purl.obolibrary.org/obo/DOID_0060095	5	40	0.167783	0.59341	CDKN2A;ESR1;IGF1;KLF11;VEGFA
DOID:13223	uterine fibroid	http://www.ontobee.org/ontology/DOID?iri=http://purl.obolibrary.org/obo/DOID_13223	5	40	0.167783	0.59341	CDKN2A;ESR1;IGF1;KLF11;VEGFA
DOID:4866	salivary gland adenoid cystic carcinoma	http://www.ontobee.org/ontology/DOID?iri=http://purl.obolibrary.org/obo/DOID_4866	5	40	0.167783	0.59341	CDKN2A;KIT;MMP15;SKP2;SOX4
DOID:715	T-cell leukemia	http://www.ontobee.org/ontology/DOID?iri=http://purl.obolibrary.org/obo/DOID_715	7	62	0.168568	0.59341	CCL18;CCND2;FOSL2;HGF;LYN;SOCS1;VEGFA
DOID:583	hemolytic anemia	http://www.ontobee.org/ontology/DOID?iri=http://purl.obolibrary.org/obo/DOID_583	6	51	0.169531	0.59341	ADAMTS13;F3;PIGA;TFRC;THBD;WT1
DOID:720	normocytic anemia	http://www.ontobee.org/ontology/DOID?iri=http://purl.obolibrary.org/obo/DOID_720	6	51	0.169531	0.59341	ADAMTS13;F3;PIGA;TFRC;THBD;WT1
DOID:3996	urinary system cancer	http://www.ontobee.org/ontology/DOID?iri=http://purl.obolibrary.org/obo/DOID_3996	39	455	0.173531	0.59341	ALCAM;BCL2L11;BTG3;CCNE1;CDKN2A;CKS1B;DKK2;DLC1;EDNRA;EPHA2;ERBB2;ESR1;FADD;FRZB;HGF;HIF1A;HIF1AN;HOXA5;HSP90AA1;IGF1;IGFBP3;JAK1;KEAP1;KIT;MTDH;MYBL2;PBRM1;PDGFA;RARB;SFPQ;SKP2;SOX9;THBS1;TRPC4;VEGFA;VIM;WT1;WTAP;ZFP36L1
DOID:3095	germ cell and embryonal cancer	http://www.ontobee.org/ontology/DOID?iri=http://purl.obolibrary.org/obo/DOID_3095	16	169	0.177761	0.59341	CDKN2A;ERBB2;ERG;FOXG1;FRZB;HGF;HIF1A;IGF1;KIT;LIF;NKX2-2;PDGFC;SKP2;SOX4;THBS1;WT1
DOID:0060071	pre-malignant neoplasm	http://www.ontobee.org/ontology/DOID?iri=http://purl.obolibrary.org/obo/DOID_0060071	3	20	0.17851	0.59341	CCND2;CDKN2A;RARB
DOID:10754	otitis media	http://www.ontobee.org/ontology/DOID?iri=http://purl.obolibrary.org/obo/DOID_10754	3	20	0.17851	0.59341	ADAMTS13;BCL6;IL6R
DOID:10892	hypospadias	http://www.ontobee.org/ontology/DOID?iri=http://purl.obolibrary.org/obo/DOID_10892	3	20	0.17851	0.59341	ESR1;TMEM70;WTAP
DOID:452	pleomorphic adenoma	http://www.ontobee.org/ontology/DOID?iri=http://purl.obolibrary.org/obo/DOID_452	3	20	0.17851	0.59341	CDKN2A;ERBB2;PDGFA
DOID:9743	diabetic neuropathy	http://www.ontobee.org/ontology/DOID?iri=http://purl.obolibrary.org/obo/DOID_9743	3	20	0.17851	0.59341	THBD;UCP3;VEGFA
DOID:12930	dilated cardiomyopathy	http://www.ontobee.org/ontology/DOID?iri=http://purl.obolibrary.org/obo/DOID_12930	9	86	0.179504	0.59341	ACTC1;ADORA1;ADRB1;CHRM2;EDNRA;ERBB2;ESR1;IGF1;PGM1
DOID:2218	blood platelet disease	http://www.ontobee.org/ontology/DOID?iri=http://purl.obolibrary.org/obo/DOID_2218	9	86	0.179504	0.59341	ABL1;ADAM12;ADAMTS13;CD177;IDH1;IDH2;THBD;THBS1;VEGFA
DOID:6713	cerebrovascular disease	http://www.ontobee.org/ontology/DOID?iri=http://purl.obolibrary.org/obo/DOID_6713	11	110	0.184103	0.59341	DDAH1;ESR1;F3;HGF;HIF1A;IGFBP3;LPL;NR3C1;PDE4D;THBD;TTR
DOID:1289	neurodegenerative disease	http://www.ontobee.org/ontology/DOID?iri=http://purl.obolibrary.org/obo/DOID_1289	62	755	0.187086	0.59341	ABL1;ADORA1;ADRB1;BACE1;BECN1;CALB2;CAT;CCKBR;CDKN2A;CHRM2;DDIT4;ELAVL4;ERG;ESR1;FADD;FGF20;FUS;GDNF;GLUD2;GRIA2;HGF;HSP90AA1;IGF1;IGFBP3;IL6R;ITGA4;ITSN1;LPL;LY6E;MAP3K5;NEDD9;NEFM;NR1H2;NR3C1;NR4A2;PHACTR2;PICALM;PON2;PON2;PPID;PPP3CA;PSEN2;RAB7A;RNF146;RRAD;RRAD;SEMA3A;SIAH1;SLC18A2;SMAD2;SYNCRIP;TCERG1;TIA1;TMEM106B;TNFRSF1A;TTPA;TTR;VAPA;VCP;VEGFA;WT1;YWHAZ
DOID:1909	melanoma	http://www.ontobee.org/ontology/DOID?iri=http://purl.obolibrary.org/obo/DOID_1909	54	652	0.189159	0.59341	ACO1;ADAM9;ALCAM;BCL2L11;CAT;CCKBR;CDC42;CDK2;CDK8;CDKN2A;CKS1B;DBF4;DKK2;EPHA2;ERBB2;F3;FAP;FKBP5;FOXA2;GAB1;GDNF;GJA1;GNA13;HGF;HIF1A;HSP90AA1;IDH1;IGF1;IGFBP3;IL6R;ITGA4;ITGA6;JAK1;KIT;NEDD9;NME1;PDE5A;PTP4A3;RAB7A;RALGDS;RARB;SKP2;SNAI1;SOCS1;SOCS3;SOX4;SOX9;SRC;TFRC;THBD;TRIB2;VEGFA;VIM;WT1
DOID:3324	mood disorder	http://www.ontobee.org/ontology/DOID?iri=http://purl.obolibrary.org/obo/DOID_3324	16	171	0.189955	0.59341	ATF5;ATF5;BHLHE40;CHRM2;DGKZ;DISC1;ESR1;FKBP5;GABRA5;HCAR3;LHX5;NR3C1;NTNG1;SLC18A2;SLC6A5;VAPA
DOID:13375	temporal arteritis	http://www.ontobee.org/ontology/DOID?iri=http://purl.obolibrary.org/obo/DOID_13375	4	31	0.190576	0.59341	HIF1A;STAT4;TNFAIP3;VEGFA
DOID:169	neuroendocrine tumor	http://www.ontobee.org/ontology/DOID?iri=http://purl.obolibrary.org/obo/DOID_169	4	31	0.190576	0.59341	ERBB2;LIF;NKX2-2;SKP2
DOID:2706	synovium cancer	http://www.ontobee.org/ontology/DOID?iri=http://purl.obolibrary.org/obo/DOID_2706	4	31	0.190576	0.59341	ERBB2;GAB1;KIT;SNAI1
DOID:525	central nervous system vasculitis	http://www.ontobee.org/ontology/DOID?iri=http://purl.obolibrary.org/obo/DOID_525	4	31	0.190576	0.59341	HIF1A;STAT4;TNFAIP3;VEGFA
DOID:5485	synovial sarcoma	http://www.ontobee.org/ontology/DOID?iri=http://purl.obolibrary.org/obo/DOID_5485	4	31	0.190576	0.59341	ERBB2;GAB1;KIT;SNAI1
DOID:154	mixed cell type cancer	http://www.ontobee.org/ontology/DOID?iri=http://purl.obolibrary.org/obo/DOID_154	2	11	0.191578	0.59341	LYN;WT1
DOID:1785	pituitary cancer	http://www.ontobee.org/ontology/DOID?iri=http://purl.obolibrary.org/obo/DOID_1785	2	11	0.191578	0.59341	LIF;SKP2
DOID:2089	constipation	http://www.ontobee.org/ontology/DOID?iri=http://purl.obolibrary.org/obo/DOID_2089	2	11	0.191578	0.59341	KIT;VIP
DOID:3650	lactic acidosis	http://www.ontobee.org/ontology/DOID?iri=http://purl.obolibrary.org/obo/DOID_3650	2	11	0.191578	0.59341	SLC25A3;TMEM70
DOID:4465	papillary renal cell carcinoma	http://www.ontobee.org/ontology/DOID?iri=http://purl.obolibrary.org/obo/DOID_4465	2	11	0.191578	0.59341	KIT;SFPQ
DOID:9779	bowel dysfunction	http://www.ontobee.org/ontology/DOID?iri=http://purl.obolibrary.org/obo/DOID_9779	2	11	0.191578	0.59341	KIT;VIP
DOID:0060086	female reproductive organ benign neoplasm	http://www.ontobee.org/ontology/DOID?iri=http://purl.obolibrary.org/obo/DOID_0060086	5	42	0.1933	0.59341	CDKN2A;ESR1;IGF1;KLF11;VEGFA
DOID:3602	toxic encephalopathy	http://www.ontobee.org/ontology/DOID?iri=http://purl.obolibrary.org/obo/DOID_3602	5	42	0.1933	0.59341	BCL2L11;GLRX;GLUD1;GRIA2;TTR
DOID:767	muscular atrophy	http://www.ontobee.org/ontology/DOID?iri=http://purl.obolibrary.org/obo/DOID_767	5	42	0.1933	0.59341	GDNF;IGF1;RAB7A;SYNCRIP;UCP3
DOID:12554	hemolytic-uremic syndrome	http://www.ontobee.org/ontology/DOID?iri=http://purl.obolibrary.org/obo/DOID_12554	3	21	0.197644	0.59341	ADAMTS13;F3;THBD
DOID:5940	malignant peripheral nerve sheath tumor	http://www.ontobee.org/ontology/DOID?iri=http://purl.obolibrary.org/obo/DOID_5940	3	21	0.197644	0.59341	CDKN2A;KIT;SOX9
DOID:4905	pancreatic carcinoma	http://www.ontobee.org/ontology/DOID?iri=http://purl.obolibrary.org/obo/DOID_4905	20	222	0.200326	0.59341	BTF3;CCKBR;CDKN2A;EPHA2;EPHA7;ERBB2;F3;FAP;GALNT3;HGF;HIF1A;IGF1;ITGA6;KIT;KLF10;LIF;MAP2K4;SOCS3;THBS1;VEGFA
DOID:3526	cerebral infarction	http://www.ontobee.org/ontology/DOID?iri=http://purl.obolibrary.org/obo/DOID_3526	6	54	0.203624	0.59341	F3;HGF;IGFBP3;LPL;NR3C1;PDE4D
DOID:3829	pituitary adenoma	http://www.ontobee.org/ontology/DOID?iri=http://purl.obolibrary.org/obo/DOID_3829	6	54	0.203624	0.59341	CDKN2A;ERBB2;LIF;NEUROD1;NNAT;VEGFA
DOID:3962	follicular thyroid carcinoma	http://www.ontobee.org/ontology/DOID?iri=http://purl.obolibrary.org/obo/DOID_3962	6	54	0.203624	0.59341	CCKBR;CDKN2A;ESR1;LIF;THBS1;VEGFA
DOID:10341	chronic meningitis	http://www.ontobee.org/ontology/DOID?iri=http://purl.obolibrary.org/obo/DOID_10341	1	3	0.204912	0.59341	HGF
DOID:10361	eosinophilic meningitis	http://www.ontobee.org/ontology/DOID?iri=http://purl.obolibrary.org/obo/DOID_10361	1	3	0.204912	0.59341	HGF
DOID:10540	gastric lymphoma	http://www.ontobee.org/ontology/DOID?iri=http://purl.obolibrary.org/obo/DOID_10540	1	3	0.204912	0.59341	BCL6
DOID:112	esophageal varix	http://www.ontobee.org/ontology/DOID?iri=http://purl.obolibrary.org/obo/DOID_112	1	3	0.204912	0.59341	VEGFA
DOID:11555	Fuchs' endothelial dystrophy	http://www.ontobee.org/ontology/DOID?iri=http://purl.obolibrary.org/obo/DOID_11555	1	3	0.204912	0.59341	PITX2
DOID:11713	diabetic angiopathy	http://www.ontobee.org/ontology/DOID?iri=http://purl.obolibrary.org/obo/DOID_11713	1	3	0.204912	0.59341	IGF1
DOID:11758	iron deficiency anemia	http://www.ontobee.org/ontology/DOID?iri=http://purl.obolibrary.org/obo/DOID_11758	1	3	0.204912	0.59341	ACO1
DOID:12098	trigeminal neuralgia	http://www.ontobee.org/ontology/DOID?iri=http://purl.obolibrary.org/obo/DOID_12098	1	3	0.204912	0.59341	SCN9A
DOID:12318	corneal granular dystrophy	http://www.ontobee.org/ontology/DOID?iri=http://purl.obolibrary.org/obo/DOID_12318	1	3	0.204912	0.59341	CAT
DOID:12510	retinal ischemia	http://www.ontobee.org/ontology/DOID?iri=http://purl.obolibrary.org/obo/DOID_12510	1	3	0.204912	0.59341	HIF1A
DOID:13501	Mobius syndrome	http://www.ontobee.org/ontology/DOID?iri=http://purl.obolibrary.org/obo/DOID_13501	1	3	0.204912	0.59341	HOXA1
DOID:14115	toxic shock syndrome	http://www.ontobee.org/ontology/DOID?iri=http://purl.obolibrary.org/obo/DOID_14115	1	3	0.204912	0.59341	F3
DOID:14702	branchiootorenal syndrome	http://www.ontobee.org/ontology/DOID?iri=http://purl.obolibrary.org/obo/DOID_14702	1	3	0.204912	0.59341	SIX1
DOID:14748	Sotos syndrome	http://www.ontobee.org/ontology/DOID?iri=http://purl.obolibrary.org/obo/DOID_14748	1	3	0.204912	0.59341	IGFBP3
DOID:1756	facial nerve disease	http://www.ontobee.org/ontology/DOID?iri=http://purl.obolibrary.org/obo/DOID_1756	1	3	0.204912	0.59341	HOXA1
DOID:1866	giant cell reparative granuloma	http://www.ontobee.org/ontology/DOID?iri=http://purl.obolibrary.org/obo/DOID_1866	1	3	0.204912	0.59341	SRC
DOID:1963	fallopian tube carcinoma	http://www.ontobee.org/ontology/DOID?iri=http://purl.obolibrary.org/obo/DOID_1963	1	3	0.204912	0.59341	ERBB2
DOID:1964	fallopian tube cancer	http://www.ontobee.org/ontology/DOID?iri=http://purl.obolibrary.org/obo/DOID_1964	1	3	0.204912	0.59341	ERBB2
DOID:297	pleomorphic adenoma carcinoma	http://www.ontobee.org/ontology/DOID?iri=http://purl.obolibrary.org/obo/DOID_297	1	3	0.204912	0.59341	CDKN2A
DOID:3315	lipoma	http://www.ontobee.org/ontology/DOID?iri=http://purl.obolibrary.org/obo/DOID_3315	1	3	0.204912	0.59341	CDKN2A
DOID:3354	fibrosarcoma of bone	http://www.ontobee.org/ontology/DOID?iri=http://purl.obolibrary.org/obo/DOID_3354	1	3	0.204912	0.59341	KIT
DOID:3664	mast cell neoplasm	http://www.ontobee.org/ontology/DOID?iri=http://purl.obolibrary.org/obo/DOID_3664	1	3	0.204912	0.59341	KIT
DOID:3765	pseudohermaphroditism	http://www.ontobee.org/ontology/DOID?iri=http://purl.obolibrary.org/obo/DOID_3765	1	3	0.204912	0.59341	NR3C1
DOID:4549	extraosseous chondrosarcoma	http://www.ontobee.org/ontology/DOID?iri=http://purl.obolibrary.org/obo/DOID_4549	1	3	0.204912	0.59341	SIX3
DOID:4660	indolent systemic mastocytosis	http://www.ontobee.org/ontology/DOID?iri=http://purl.obolibrary.org/obo/DOID_4660	1	3	0.204912	0.59341	KIT
DOID:4730	vasomotor rhinitis	http://www.ontobee.org/ontology/DOID?iri=http://purl.obolibrary.org/obo/DOID_4730	1	3	0.204912	0.59341	VIP
DOID:4791	supratentorial primitive neuroectodermal tumor	http://www.ontobee.org/ontology/DOID?iri=http://purl.obolibrary.org/obo/DOID_4791	1	3	0.204912	0.59341	CDKN2A
DOID:4929	tubular adenocarcinoma	http://www.ontobee.org/ontology/DOID?iri=http://purl.obolibrary.org/obo/DOID_4929	1	3	0.204912	0.59341	ERBB2
DOID:5522	basaloid squamous cell carcinoma	http://www.ontobee.org/ontology/DOID?iri=http://purl.obolibrary.org/obo/DOID_5522	1	3	0.204912	0.59341	CDKN2A
DOID:561	trigeminal nerve disease	http://www.ontobee.org/ontology/DOID?iri=http://purl.obolibrary.org/obo/DOID_561	1	3	0.204912	0.59341	SCN9A
DOID:6367	acral lentiginous melanoma	http://www.ontobee.org/ontology/DOID?iri=http://purl.obolibrary.org/obo/DOID_6367	1	3	0.204912	0.59341	CDKN2A
DOID:6496	extraskeletal myxoid chondrosarcoma	http://www.ontobee.org/ontology/DOID?iri=http://purl.obolibrary.org/obo/DOID_6496	1	3	0.204912	0.59341	SIX3
DOID:668	myositis ossificans	http://www.ontobee.org/ontology/DOID?iri=http://purl.obolibrary.org/obo/DOID_668	1	3	0.204912	0.59341	ACVR1
DOID:7475	diverticulitis	http://www.ontobee.org/ontology/DOID?iri=http://purl.obolibrary.org/obo/DOID_7475	1	3	0.204912	0.59341	VEGFA
DOID:7551	gonorrhea	http://www.ontobee.org/ontology/DOID?iri=http://purl.obolibrary.org/obo/DOID_7551	1	3	0.204912	0.59341	BCL2L11
DOID:8850	salivary gland cancer	http://www.ontobee.org/ontology/DOID?iri=http://purl.obolibrary.org/obo/DOID_8850	1	3	0.204912	0.59341	CDKN2A
DOID:906	peroxisomal disease	http://www.ontobee.org/ontology/DOID?iri=http://purl.obolibrary.org/obo/DOID_906	1	3	0.204912	0.59341	PEX5
DOID:9682	yellow fever	http://www.ontobee.org/ontology/DOID?iri=http://purl.obolibrary.org/obo/DOID_9682	1	3	0.204912	0.59341	CSNK1A1
DOID:9912	hydrocele	http://www.ontobee.org/ontology/DOID?iri=http://purl.obolibrary.org/obo/DOID_9912	1	3	0.204912	0.59341	VEGFA
DOID:654	overnutrition	http://www.ontobee.org/ontology/DOID?iri=http://purl.obolibrary.org/obo/DOID_654	26	298	0.205184	0.59341	ADRA2A;ADRB1;CAPN5;CDKN2A;ESR1;F3;GALR1;HGF;HIF1A;HNF1A;IGF1;IGFBP3;INSIG2;IRS2;LPL;MAP3K5;NNAT;NR1H2;NR3C1;NRXN3;PFKP;RORA;SOCS3;TNFRSF1A;TTR;UCP3
DOID:11981	morbid obesity	http://www.ontobee.org/ontology/DOID?iri=http://purl.obolibrary.org/obo/DOID_11981	4	32	0.206092	0.59341	ADRB1;ESR1;INSIG2;IRS2
DOID:3113	papillary carcinoma	http://www.ontobee.org/ontology/DOID?iri=http://purl.obolibrary.org/obo/DOID_3113	5	43	0.206542	0.59341	CDKN2A;ERBB2;RUNX2;SNAI1;WT1
DOID:2213	hemorrhagic disease	http://www.ontobee.org/ontology/DOID?iri=http://purl.obolibrary.org/obo/DOID_2213	13	137	0.20666	0.59341	ABL1;ADAM12;ADAMTS13;CAT;CD177;HGF;IDH1;IDH2;IGF1;SERPINF2;THBD;THBS1;VEGFA
DOID:374	nutrition disease	http://www.ontobee.org/ontology/DOID?iri=http://purl.obolibrary.org/obo/DOID_374	27	313	0.216825	0.61399	ACO1;ADRA2A;ADRB1;CAPN5;CDKN2A;ESR1;F3;GALR1;HGF;HIF1A;HNF1A;IGF1;IGFBP3;INSIG2;IRS2;LPL;MAP3K5;NNAT;NR1H2;NR3C1;NRXN3;PFKP;RORA;SOCS3;TNFRSF1A;TTR;UCP3
DOID:14221	metabolic syndrome X	http://www.ontobee.org/ontology/DOID?iri=http://purl.obolibrary.org/obo/DOID_14221	3	22	0.217241	0.61399	F3;IGF1;IGFBP3
DOID:631	fibromyalgia	http://www.ontobee.org/ontology/DOID?iri=http://purl.obolibrary.org/obo/DOID_631	3	22	0.217241	0.61399	IGF1;IGFBP3;NR3C1
DOID:9834	hyperopia	http://www.ontobee.org/ontology/DOID?iri=http://purl.obolibrary.org/obo/DOID_9834	3	22	0.217241	0.61399	CBL;HGF;IGF1
DOID:11383	cryptorchidism	http://www.ontobee.org/ontology/DOID?iri=http://purl.obolibrary.org/obo/DOID_11383	2	12	0.219326	0.61399	ESR1;IGFBP3
DOID:3133	acute porphyria	http://www.ontobee.org/ontology/DOID?iri=http://purl.obolibrary.org/obo/DOID_3133	2	12	0.219326	0.61399	CPOX;TFRC
DOID:3911	progeria	http://www.ontobee.org/ontology/DOID?iri=http://purl.obolibrary.org/obo/DOID_3911	2	12	0.219326	0.61399	RARB;ZMPSTE24
DOID:6132	bronchitis	http://www.ontobee.org/ontology/DOID?iri=http://purl.obolibrary.org/obo/DOID_6132	2	12	0.219326	0.61399	THBD;VEGFA
DOID:7319	axonal neuropathy	http://www.ontobee.org/ontology/DOID?iri=http://purl.obolibrary.org/obo/DOID_7319	2	12	0.219326	0.61399	TNFRSF1A;VIM
DOID:3355	fibrosarcoma	http://www.ontobee.org/ontology/DOID?iri=http://purl.obolibrary.org/obo/DOID_3355	4	33	0.221958	0.61621	F3;FUS;KIT;RARB
DOID:5158	pleural cancer	http://www.ontobee.org/ontology/DOID?iri=http://purl.obolibrary.org/obo/DOID_5158	4	33	0.221958	0.61621	ACTR1A;CDKN2A;SRC;VEGFA
DOID:7474	malignant pleural mesothelioma	http://www.ontobee.org/ontology/DOID?iri=http://purl.obolibrary.org/obo/DOID_7474	4	33	0.221958	0.61621	ACTR1A;CDKN2A;SRC;VEGFA
DOID:17	musculoskeletal system disease	http://www.ontobee.org/ontology/DOID?iri=http://purl.obolibrary.org/obo/DOID_17	81	1016	0.22346	0.617196	ABL1;ACADS;ACTC1;ACVR1;ACVR1B;BACE1;BCL2L11;BMP2K;CA10;CALCR;CAT;CCL18;CDKN2A;COL9A3;DIO3;ERBB2;ESR1;F3;FAP;FHL1;FKBP5;FOSL2;FRZB;GDNF;GJA1;HGF;HIF1A;HLX;HNRNPA1;HOXD9;HSP90AA1;IGF1;IGFBP3;IL1RAPL2;IL21R;IL6R;IRS2;ITGA4;ITGA6;KCNJ2;KIT;LPAR3;LYN;MAP2K4;MAP2K7;MAP3K5;MBNL1;NEDD9;NR3C1;P4HA1;P4HA2;PDGFA;PLEK;PRDM1;PSMD7;PTPN13;RAB7A;RARB;RARG;REL;RUNX2;SIRT1;SLC22A5;SMAD2;SOCS1;SOX9;STAT4;SYNCRIP;T…
DOID:9970	obesity	http://www.ontobee.org/ontology/DOID?iri=http://purl.obolibrary.org/obo/DOID_9970	25	289	0.223542	0.617196	ADRA2A;ADRB1;CAPN5;CDKN2A;ESR1;GALR1;HGF;HIF1A;HNF1A;IGF1;IGFBP3;INSIG2;IRS2;LPL;MAP3K5;NNAT;NR1H2;NR3C1;NRXN3;PFKP;RORA;SOCS3;TNFRSF1A;TTR;UCP3
DOID:4195	hyperglycemia	http://www.ontobee.org/ontology/DOID?iri=http://purl.obolibrary.org/obo/DOID_4195	12	128	0.230891	0.634136	GFPT2;GLDC;GRB2;HIF1A;HNF1A;IGF1;LPL;NEUROD1;SIRT1;SNAI1;TNFRSF1A;UCP3
DOID:0060041	autism spectrum disorder	http://www.ontobee.org/ontology/DOID?iri=http://purl.obolibrary.org/obo/DOID_0060041	15	165	0.23157	0.634136	DISC1;DLX2;DOCK4;GABRA5;GABRB1;GJA1;GRIA2;HGF;HOXA1;ITGA4;NRXN1;SCN1A;STK39;TSC1;VEGFA
DOID:12849	autistic disorder	http://www.ontobee.org/ontology/DOID?iri=http://purl.obolibrary.org/obo/DOID_12849	15	165	0.23157	0.634136	DISC1;DLX2;DOCK4;GABRA5;GABRB1;GJA1;GRIA2;HGF;HOXA1;ITGA4;NRXN1;SCN1A;STK39;TSC1;VEGFA
DOID:3082	interstitial lung disease	http://www.ontobee.org/ontology/DOID?iri=http://purl.obolibrary.org/obo/DOID_3082	14	153	0.234191	0.639571	CAT;CCL18;CDKN2A;ERBB2;FGF7;FOSL2;GATA6;IGF1;IGFBP3;METAP2;SOCS1;STX2;VEGFA;YY1
DOID:6000	congestive heart failure	http://www.ontobee.org/ontology/DOID?iri=http://purl.obolibrary.org/obo/DOID_6000	18	203	0.235871	0.642414	ADAMTS13;ADORA1;ADRB1;EDNRA;ERBB2;F3;FOXC1;GATM;GJA1;HGF;IGF1;KCND3;PDE5A;THBS1;TNFRSF1A;TTR;VEGFA;YY1
DOID:13515	tuberous sclerosis	http://www.ontobee.org/ontology/DOID?iri=http://purl.obolibrary.org/obo/DOID_13515	3	23	0.237217	0.644332	DDIT4;RHEB;TSC1
DOID:1561	cognitive disorder	http://www.ontobee.org/ontology/DOID?iri=http://purl.obolibrary.org/obo/DOID_1561	76	955	0.238215	0.6453	ABL1;ADAM12;ADAMTS13;ADORA1;ADRA2A;ADRB1;ATF5;ATF5;ATPAF2;BACE1;BHLHE40;CCKBR;CDC42EP3;CDKN2A;CHL1;CHRM2;DDAH1;DDIT4;DGCR2;DGKZ;DISC1;ERG;ERLIN1;ESR1;FKBP5;FUS;GABRA5;GCLC;GDNF;GLUD1;GRB2;GRIA2;GULP1;HCAR3;HSP90AA1;IGF1;IL6R;IPO5;ITSN1;JARID2;KIF17;LHX5;LPL;NDEL1;NEDD9;NEFM;NR1H2;NR3C1;NR4A2;NRXN1;NRXN3;NTNG1;PEA15;PFKM;PICALM;PIP4K2A;PPID;PPP3CA;PSEN2;RAB7A;RAP2B;RNF146;SEMA3A;SLC18A2;SLC25A3;SL…
DOID:4007	bladder carcinoma	http://www.ontobee.org/ontology/DOID?iri=http://purl.obolibrary.org/obo/DOID_4007	6	57	0.239947	0.645745	CDKN2A;EPHA2;ERBB2;MYBL2;VEGFA;VIM
DOID:10808	gastric ulcer	http://www.ontobee.org/ontology/DOID?iri=http://purl.obolibrary.org/obo/DOID_10808	2	13	0.247374	0.645745	HIF1A;VEGFA
DOID:12689	acoustic neuroma	http://www.ontobee.org/ontology/DOID?iri=http://purl.obolibrary.org/obo/DOID_12689	2	13	0.247374	0.645745	ESR1;KIT
DOID:13268	porphyria	http://www.ontobee.org/ontology/DOID?iri=http://purl.obolibrary.org/obo/DOID_13268	2	13	0.247374	0.645745	CPOX;TFRC
DOID:288	endometriosis of uterus	http://www.ontobee.org/ontology/DOID?iri=http://purl.obolibrary.org/obo/DOID_288	2	13	0.247374	0.645745	CAT;CDKN2A
DOID:3086	gingival overgrowth	http://www.ontobee.org/ontology/DOID?iri=http://purl.obolibrary.org/obo/DOID_3086	2	13	0.247374	0.645745	FGF7;HGF
DOID:4621	holoprosencephaly	http://www.ontobee.org/ontology/DOID?iri=http://purl.obolibrary.org/obo/DOID_4621	2	13	0.247374	0.645745	FOXH1;SIX3
DOID:6204	follicular adenoma	http://www.ontobee.org/ontology/DOID?iri=http://purl.obolibrary.org/obo/DOID_6204	2	13	0.247374	0.645745	CDKN2A;NME1
DOID:0080006	bone development disease	http://www.ontobee.org/ontology/DOID?iri=http://purl.obolibrary.org/obo/DOID_0080006	5	46	0.247893	0.645745	FHL1;GJA1;IGF1;RUNX2;WNT7A
DOID:341	peripheral vascular disease	http://www.ontobee.org/ontology/DOID?iri=http://purl.obolibrary.org/obo/DOID_341	6	58	0.252469	0.645745	CDKN2A;HGF;HIF1A;IGF1;SCN9A;VEGFA
DOID:5419	schizophrenia	http://www.ontobee.org/ontology/DOID?iri=http://purl.obolibrary.org/obo/DOID_5419	46	566	0.253807	0.645745	ADAM12;ADORA1;ADRA2A;BACE1;CDC42EP3;CHL1;DDAH1;DGCR2;DISC1;ERLIN1;ESR1;GCLC;GDNF;GLUD1;GRB2;GRIA2;GULP1;HCAR3;HSP90AA1;IGF1;IL6R;IPO5;JARID2;KIF17;NDEL1;NEFM;NR3C1;NR4A2;NRXN1;NRXN3;NTNG1;PEA15;PFKM;PICALM;PIP4K2A;PPP3CA;RAP2B;SEMA3A;SLC18A2;SLC25A3;SLC6A5;SLC6A9;TTR;VEGFA;VIM;YWHAZ
DOID:255	hemangioma	http://www.ontobee.org/ontology/DOID?iri=http://purl.obolibrary.org/obo/DOID_255	4	35	0.254568	0.645745	HIF1A;PDGFA;SLC18A2;VEGFA
DOID:4440	seminoma	http://www.ontobee.org/ontology/DOID?iri=http://purl.obolibrary.org/obo/DOID_4440	3	24	0.25749	0.645745	GJA1;KIT;SOX17
DOID:5113	nutritional deficiency disease	http://www.ontobee.org/ontology/DOID?iri=http://purl.obolibrary.org/obo/DOID_5113	3	24	0.25749	0.645745	ACO1;CDKN2A;IGF1
DOID:863	nervous system disease	http://www.ontobee.org/ontology/DOID?iri=http://purl.obolibrary.org/obo/DOID_863	123	1587	0.259902	0.645745	ABL1;ACOT7;ACTC1;ADAM9;ADAMTS13;ADORA1;ADRB1;BACE1;BCL2L11;BCL6;BECN1;BMP2K;CALB2;CAT;CBL;CCKBR;CCNE1;CCNE2;CDK2;CDKN2A;CHRM2;COL8A1;CTNND2;DDIT4;EDNRA;ELAVL4;EPHA2;ERBB2;ERG;ESR1;F3;FADD;FAM3C;FGF20;FHL1;FOXC1;FOXG1;FUS;FXR1;GDNF;GJA1;GLRX;GLUD1;GLUD2;GRIA2;GTF2I;HGF;HIF1A;HNRNPA1;HOXA1;HSP90AA1;IGF1;IGFBP3;IL6R;ITGA4;ITSN1;JARID2;KCNA1;KEAP1;KIT;LGI1;LPL;LY6E;MAP3K5;MDM1;MYO1C;NEDD9;NEFM;NME1;N…
DOID:193	reproductive organ cancer	http://www.ontobee.org/ontology/DOID?iri=http://purl.obolibrary.org/obo/DOID_193	55	686	0.262745	0.645745	ADAMTS13;AKR1C2;ALCAM;BECN1;CCL18;CCND2;CCNE1;CCNL1;CDKN2A;CHL1;CTNND2;DLC1;EDNRA;EPHA2;ERBB2;ESR1;ETV6;F2RL3;F3;GRB10;HGF;HIF1A;IGF1;IGFBP3;JAK1;KIT;LIF;LIN28A;MAP3K1;MMP15;MTDH;NME1;RARB;RHEB;RORA;RUNX2;SCN9A;SEMA3A;SKP2;SMAD2;SNAI1;SOCS3;SRC;ST3GAL5;ST6GAL1;TGFB2;THBS1;TNFRSF1A;TPT1;USP2;VEGFA;VIM;WT1;YBX1;YWHAZ
DOID:10303	sialadenitis	http://www.ontobee.org/ontology/DOID?iri=http://purl.obolibrary.org/obo/DOID_10303	1	4	0.263438	0.645745	HGF
DOID:10824	malignant hypertension	http://www.ontobee.org/ontology/DOID?iri=http://purl.obolibrary.org/obo/DOID_10824	1	4	0.263438	0.645745	ADAMTS13
DOID:11111	hydronephrosis	http://www.ontobee.org/ontology/DOID?iri=http://purl.obolibrary.org/obo/DOID_11111	1	4	0.263438	0.645745	HIF1A
DOID:11239	appendix cancer	http://www.ontobee.org/ontology/DOID?iri=http://purl.obolibrary.org/obo/DOID_11239	1	4	0.263438	0.645745	VIM
DOID:11554	Chandler syndrome	http://www.ontobee.org/ontology/DOID?iri=http://purl.obolibrary.org/obo/DOID_11554	1	4	0.263438	0.645745	PITX2
DOID:13579	kwashiorkor	http://www.ontobee.org/ontology/DOID?iri=http://purl.obolibrary.org/obo/DOID_13579	1	4	0.263438	0.645745	IGF1
DOID:1383	sweat gland disease	http://www.ontobee.org/ontology/DOID?iri=http://purl.obolibrary.org/obo/DOID_1383	1	4	0.263438	0.645745	PGP
DOID:2187	amelogenesis imperfecta	http://www.ontobee.org/ontology/DOID?iri=http://purl.obolibrary.org/obo/DOID_2187	1	4	0.263438	0.645745	CNNM4
DOID:2297	leptospirosis	http://www.ontobee.org/ontology/DOID?iri=http://purl.obolibrary.org/obo/DOID_2297	1	4	0.263438	0.645745	TNFRSF1A
DOID:2481	infantile epileptic encephalopathy	http://www.ontobee.org/ontology/DOID?iri=http://purl.obolibrary.org/obo/DOID_2481	1	4	0.263438	0.645745	SCN1A
DOID:3112	papillary adenocarcinoma	http://www.ontobee.org/ontology/DOID?iri=http://purl.obolibrary.org/obo/DOID_3112	1	4	0.263438	0.645745	KEAP1
DOID:3168	squamous cell neoplasm	http://www.ontobee.org/ontology/DOID?iri=http://purl.obolibrary.org/obo/DOID_3168	1	4	0.263438	0.645745	FGF7
DOID:3223	complex regional pain syndrome	http://www.ontobee.org/ontology/DOID?iri=http://purl.obolibrary.org/obo/DOID_3223	1	4	0.263438	0.645745	SCN9A
DOID:3305	teratocarcinoma	http://www.ontobee.org/ontology/DOID?iri=http://purl.obolibrary.org/obo/DOID_3305	1	4	0.263438	0.645745	ERBB2
DOID:3306	mixed germ cell cancer	http://www.ontobee.org/ontology/DOID?iri=http://purl.obolibrary.org/obo/DOID_3306	1	4	0.263438	0.645745	ERBB2
DOID:3559	pseudomyxoma peritonei	http://www.ontobee.org/ontology/DOID?iri=http://purl.obolibrary.org/obo/DOID_3559	1	4	0.263438	0.645745	VIM
DOID:4310	smooth muscle tumor	http://www.ontobee.org/ontology/DOID?iri=http://purl.obolibrary.org/obo/DOID_4310	1	4	0.263438	0.645745	WT1
DOID:4959	epidermolysis bullosa dystrophica	http://www.ontobee.org/ontology/DOID?iri=http://purl.obolibrary.org/obo/DOID_4959	1	4	0.263438	0.645745	IGFBP3
DOID:5160	arteriosclerosis obliterans	http://www.ontobee.org/ontology/DOID?iri=http://purl.obolibrary.org/obo/DOID_5160	1	4	0.263438	0.645745	VEGFA
DOID:5861	myxoid chondrosarcoma	http://www.ontobee.org/ontology/DOID?iri=http://purl.obolibrary.org/obo/DOID_5861	1	4	0.263438	0.645745	SIX3
DOID:6612	leukocyte adhesion deficiency	http://www.ontobee.org/ontology/DOID?iri=http://purl.obolibrary.org/obo/DOID_6612	1	4	0.263438	0.645745	SLC35C1
DOID:6688	autoimmune lymphoproliferative syndrome	http://www.ontobee.org/ontology/DOID?iri=http://purl.obolibrary.org/obo/DOID_6688	1	4	0.263438	0.645745	FADD
DOID:8866	actinic keratosis	http://www.ontobee.org/ontology/DOID?iri=http://purl.obolibrary.org/obo/DOID_8866	1	4	0.263438	0.645745	CDKN2A
DOID:2468	psychotic disorder	http://www.ontobee.org/ontology/DOID?iri=http://purl.obolibrary.org/obo/DOID_2468	46	569	0.266079	0.65063	ADAM12;ADORA1;ADRA2A;BACE1;CDC42EP3;CHL1;DDAH1;DGCR2;DISC1;ERLIN1;ESR1;GCLC;GDNF;GLUD1;GRB2;GRIA2;GULP1;HCAR3;HSP90AA1;IGF1;IL6R;IPO5;JARID2;KIF17;NDEL1;NEFM;NR3C1;NR4A2;NRXN1;NRXN3;NTNG1;PEA15;PFKM;PICALM;PIP4K2A;PPP3CA;RAP2B;SEMA3A;SLC18A2;SLC25A3;SLC6A5;SLC6A9;TTR;VEGFA;VIM;YWHAZ
DOID:3713	ovary adenocarcinoma	http://www.ontobee.org/ontology/DOID?iri=http://purl.obolibrary.org/obo/DOID_3713	4	36	0.271228	0.660557	IGFBP3;SKP2;USP2;VEGFA
DOID:2994	germ cell cancer	http://www.ontobee.org/ontology/DOID?iri=http://purl.obolibrary.org/obo/DOID_2994	39	479	0.271733	0.660557	ACTR1A;CAT;CCKBR;CCND2;CCNE1;CDKN2A;ERBB2;ERG;FOXG1;FRZB;GJA1;HGF;HIF1A;HMG20B;HSP90AA1;IGF1;IGFBP3;ITGA6;JAK1;KIT;LIF;MAP2K4;MTUS1;NEUROD1;NKX2-2;PDGFC;PRDM1;RUNX2;SKP2;SMAD2;SNAI1;SOX17;SOX4;STAG1;THBS1;TNKS2;WNT7A;WT1;ZNF202
DOID:12206	dengue hemorrhagic fever	http://www.ontobee.org/ontology/DOID?iri=http://purl.obolibrary.org/obo/DOID_12206	2	14	0.275528	0.660557	JAK1;VEGFA
DOID:2256	osteochondrodysplasia	http://www.ontobee.org/ontology/DOID?iri=http://purl.obolibrary.org/obo/DOID_2256	2	14	0.275528	0.660557	IGF1;RUNX2
DOID:2891	thyroid adenoma	http://www.ontobee.org/ontology/DOID?iri=http://purl.obolibrary.org/obo/DOID_2891	2	14	0.275528	0.660557	CDKN2A;NME1
DOID:3149	keratoacanthoma	http://www.ontobee.org/ontology/DOID?iri=http://purl.obolibrary.org/obo/DOID_3149	2	14	0.275528	0.660557	CDKN2A;THBS1
DOID:3328	temporal lobe epilepsy	http://www.ontobee.org/ontology/DOID?iri=http://purl.obolibrary.org/obo/DOID_3328	5	48	0.276553	0.660557	ACOT7;FAM3C;GRIA2;LGI1;SCN1A
DOID:4948	gallbladder carcinoma	http://www.ontobee.org/ontology/DOID?iri=http://purl.obolibrary.org/obo/DOID_4948	5	48	0.276553	0.660557	CDKN2A;ERBB2;NME1;SKP2;VEGFA
DOID:0002116	pterygium	http://www.ontobee.org/ontology/DOID?iri=http://purl.obolibrary.org/obo/DOID_0002116	3	25	0.277983	0.660557	F3;SKP2;VEGFA
DOID:10139	conjunctival degeneration	http://www.ontobee.org/ontology/DOID?iri=http://purl.obolibrary.org/obo/DOID_10139	3	25	0.277983	0.660557	F3;SKP2;VEGFA
DOID:10526	conjunctival pterygium	http://www.ontobee.org/ontology/DOID?iri=http://purl.obolibrary.org/obo/DOID_10526	3	25	0.277983	0.660557	F3;SKP2;VEGFA
DOID:303	substance-related disorder	http://www.ontobee.org/ontology/DOID?iri=http://purl.obolibrary.org/obo/DOID_303	6	60	0.278025	0.660557	KCND3;KCNJ2;SCN1A;SLC6A1;SLC6A9;TNKS2
DOID:0060158	acquired metabolic disease	http://www.ontobee.org/ontology/DOID?iri=http://purl.obolibrary.org/obo/DOID_0060158	64	811	0.286717	0.679601	ACO1;ADAMTS13;ADRA2A;ADRB1;CAPN5;CAT;CDKN2A;DDAH1;ERBB2;ESR1;F3;FADD;GALNT3;GALR1;GFPT2;GLDC;GLUD1;GRB2;HGF;HIF1A;HLF;HNF1A;IGF1;IGF2BP2;IGFBP3;IL21R;IL6R;INSIG2;IRS2;KEAP1;KLF11;LPL;MAP3K1;MAP3K5;NEUROD1;NNAT;NR1H2;NR3C1;NRXN3;PEA15;PFKP;PON2;PON2;RORA;SH2B3;SIRT1;SLC18A2;SLC22A5;SLC25A3;SLC29A3;SNAI1;SOCS1;SOCS3;SOX4;STAT4;TCF7;THBD;TMEM70;TNFAIP3;TNFRSF1A;TSC1;TTR;UCP3;VEGFA
DOID:6432	pulmonary hypertension	http://www.ontobee.org/ontology/DOID?iri=http://purl.obolibrary.org/obo/DOID_6432	7	73	0.289267	0.682166	F3;HIF1A;LYVE1;SMAD1;TRPC4;TTR;VEGFA
DOID:3121	gallbladder cancer	http://www.ontobee.org/ontology/DOID?iri=http://purl.obolibrary.org/obo/DOID_3121	5	49	0.291132	0.682166	CDKN2A;ERBB2;NME1;SKP2;VEGFA
DOID:5679	retinal disease	http://www.ontobee.org/ontology/DOID?iri=http://purl.obolibrary.org/obo/DOID_5679	32	392	0.291472	0.682166	ADAM9;ADRB1;CCNE1;CCNE2;CDK2;CDKN2A;COL8A1;EDNRA;ERBB2;ESR1;FOXC1;GJA1;GTF2I;HIF1A;IGF1;IGFBP3;KIT;MAP3K5;MDM1;NME1;PEX5;PITX2;RORA;RUNX2;SLC4A10;SNRNP200;TNFRSF1A;TTR;VCP;VEGFA;WT1;ZEB1
DOID:0050851	glomerulosclerosis	http://www.ontobee.org/ontology/DOID?iri=http://purl.obolibrary.org/obo/DOID_0050851	3	26	0.298623	0.682166	IGFBP3;SMAD2;WT1
DOID:10159	osteonecrosis	http://www.ontobee.org/ontology/DOID?iri=http://purl.obolibrary.org/obo/DOID_10159	3	26	0.298623	0.682166	HIF1A;IGFBP3;VEGFA
DOID:1312	focal segmental glomerulosclerosis	http://www.ontobee.org/ontology/DOID?iri=http://purl.obolibrary.org/obo/DOID_1312	3	26	0.298623	0.682166	IGFBP3;SMAD2;WT1
DOID:184	bone cancer	http://www.ontobee.org/ontology/DOID?iri=http://purl.obolibrary.org/obo/DOID_184	3	26	0.298623	0.682166	CDKN2A;HIF1A;VEGFA
DOID:2001	neuroma	http://www.ontobee.org/ontology/DOID?iri=http://purl.obolibrary.org/obo/DOID_2001	3	26	0.298623	0.682166	ESR1;KIT;SEMA3A
DOID:8029	sporadic breast cancer	http://www.ontobee.org/ontology/DOID?iri=http://purl.obolibrary.org/obo/DOID_8029	3	26	0.298623	0.682166	CDKN2A;HIF1A;VEGFA
DOID:3620	central nervous system cancer	http://www.ontobee.org/ontology/DOID?iri=http://purl.obolibrary.org/obo/DOID_3620	10	111	0.29903	0.682166	CAT;CDKN2A;EPB41;ERBB2;ETV6;F3;FAP;JAK1;VEGFA;YWHAZ
DOID:913	atrophic muscular disease	http://www.ontobee.org/ontology/DOID?iri=http://purl.obolibrary.org/obo/DOID_913	7	74	0.301192	0.682166	FHL1;FXR1;HNRNPA1;NR3C1;VCP;VEGFA;YTHDC1
DOID:9884	muscular dystrophy	http://www.ontobee.org/ontology/DOID?iri=http://purl.obolibrary.org/obo/DOID_9884	7	74	0.301192	0.682166	FHL1;FXR1;HNRNPA1;NR3C1;VCP;VEGFA;YTHDC1
DOID:1247	blood coagulation disease	http://www.ontobee.org/ontology/DOID?iri=http://purl.obolibrary.org/obo/DOID_1247	14	162	0.303822	0.682166	ABL1;ADAM12;ADAMTS13;CAT;CD177;F3;HGF;IDH1;IDH2;IGF1;SERPINF2;THBD;THBS1;VEGFA
DOID:2893	cervix carcinoma	http://www.ontobee.org/ontology/DOID?iri=http://purl.obolibrary.org/obo/DOID_2893	9	99	0.303876	0.682166	CCNE1;CCNL1;CDKN2A;GRB10;SMAD2;SNAI1;SOCS3;ST6GAL1;WT1
DOID:3973	thyroid medullary carcinoma	http://www.ontobee.org/ontology/DOID?iri=http://purl.obolibrary.org/obo/DOID_3973	4	38	0.305051	0.682166	CCKBR;ESR1;LIF;VEGFA
DOID:1575	rheumatic disease	http://www.ontobee.org/ontology/DOID?iri=http://purl.obolibrary.org/obo/DOID_1575	15	175	0.305951	0.682166	ABL1;ACVR1B;BCL2L11;CCL18;ESR1;FOSL2;HGF;IGF1;IGFBP3;SMAD2;STAT4;THBS1;TNFAIP3;VEGFA;ZMPSTE24
DOID:418	systemic scleroderma	http://www.ontobee.org/ontology/DOID?iri=http://purl.obolibrary.org/obo/DOID_418	15	175	0.305951	0.682166	ABL1;ACVR1B;BCL2L11;CCL18;ESR1;FOSL2;HGF;IGF1;IGFBP3;SMAD2;STAT4;THBS1;TNFAIP3;VEGFA;ZMPSTE24
DOID:419	scleroderma	http://www.ontobee.org/ontology/DOID?iri=http://purl.obolibrary.org/obo/DOID_419	15	175	0.305951	0.682166	ABL1;ACVR1B;BCL2L11;CCL18;ESR1;FOSL2;HGF;IGF1;IGFBP3;SMAD2;STAT4;THBS1;TNFAIP3;VEGFA;ZMPSTE24
DOID:8466	retinal degeneration	http://www.ontobee.org/ontology/DOID?iri=http://purl.obolibrary.org/obo/DOID_8466	18	214	0.310291	0.682166	ADRB1;COL8A1;EDNRA;ESR1;FOXC1;GJA1;HIF1A;MDM1;PEX5;PITX2;RORA;SLC4A10;SNRNP200;TNFRSF1A;TTR;VCP;VEGFA;ZEB1
DOID:4362	cervical cancer	http://www.ontobee.org/ontology/DOID?iri=http://purl.obolibrary.org/obo/DOID_4362	9	100	0.314267	0.682166	CCNE1;CCNL1;CDKN2A;GRB10;SMAD2;SNAI1;SOCS3;ST6GAL1;WT1
DOID:3070	malignant glioma	http://www.ontobee.org/ontology/DOID?iri=http://purl.obolibrary.org/obo/DOID_3070	16	189	0.315249	0.682166	ARL4A;BCL2L11;CCNE1;CDKN2A;IDH1;IDH2;IGF1;KIT;MAP2K4;MTDH;PDGFA;RARB;SEMA3A;SMAD2;TSC1;WT1
DOID:1029	familial periodic paralysis	http://www.ontobee.org/ontology/DOID?iri=http://purl.obolibrary.org/obo/DOID_1029	1	5	0.317665	0.682166	KCNJ2
DOID:10632	Wolfram syndrome	http://www.ontobee.org/ontology/DOID?iri=http://purl.obolibrary.org/obo/DOID_10632	1	5	0.317665	0.682166	CRMP1
DOID:10964	cholesteatoma of middle ear	http://www.ontobee.org/ontology/DOID?iri=http://purl.obolibrary.org/obo/DOID_10964	1	5	0.317665	0.682166	CDKN2A
DOID:11193	syndactyly	http://www.ontobee.org/ontology/DOID?iri=http://purl.obolibrary.org/obo/DOID_11193	1	5	0.317665	0.682166	GJA1
DOID:11252	microcytic anemia	http://www.ontobee.org/ontology/DOID?iri=http://purl.obolibrary.org/obo/DOID_11252	1	5	0.317665	0.682166	ACO1
DOID:11433	middle ear cholesteatoma	http://www.ontobee.org/ontology/DOID?iri=http://purl.obolibrary.org/obo/DOID_11433	1	5	0.317665	0.682166	CDKN2A
DOID:11719	oculopharyngeal muscular dystrophy	http://www.ontobee.org/ontology/DOID?iri=http://purl.obolibrary.org/obo/DOID_11719	1	5	0.317665	0.682166	HNRNPA1
DOID:11727	facioscapulohumeral muscular dystrophy	http://www.ontobee.org/ontology/DOID?iri=http://purl.obolibrary.org/obo/DOID_11727	1	5	0.317665	0.682166	FXR1
DOID:12785	diabetic polyneuropathy	http://www.ontobee.org/ontology/DOID?iri=http://purl.obolibrary.org/obo/DOID_12785	1	5	0.317665	0.682166	VEGFA
DOID:14261	fragile X syndrome	http://www.ontobee.org/ontology/DOID?iri=http://purl.obolibrary.org/obo/DOID_14261	1	5	0.317665	0.682166	WNT7A
DOID:2691	myoma	http://www.ontobee.org/ontology/DOID?iri=http://purl.obolibrary.org/obo/DOID_2691	1	5	0.317665	0.682166	PDGFA
DOID:308	early myoclonic encephalopathy	http://www.ontobee.org/ontology/DOID?iri=http://purl.obolibrary.org/obo/DOID_308	1	5	0.317665	0.682166	SCN1A
DOID:3209	junctional epidermolysis bullosa	http://www.ontobee.org/ontology/DOID?iri=http://purl.obolibrary.org/obo/DOID_3209	1	5	0.317665	0.682166	LAMB3
DOID:3605	ovarian cystadenocarcinoma	http://www.ontobee.org/ontology/DOID?iri=http://purl.obolibrary.org/obo/DOID_3605	1	5	0.317665	0.682166	USP2
DOID:3669	intermittent claudication	http://www.ontobee.org/ontology/DOID?iri=http://purl.obolibrary.org/obo/DOID_3669	1	5	0.317665	0.682166	IGF1
DOID:3781	anovulation	http://www.ontobee.org/ontology/DOID?iri=http://purl.obolibrary.org/obo/DOID_3781	1	5	0.317665	0.682166	IGF1
DOID:3946	pituitary-dependent Cushing's disease	http://www.ontobee.org/ontology/DOID?iri=http://purl.obolibrary.org/obo/DOID_3946	1	5	0.317665	0.682166	CDKN2A
DOID:4006	bladder transitional cell carcinoma	http://www.ontobee.org/ontology/DOID?iri=http://purl.obolibrary.org/obo/DOID_4006	1	5	0.317665	0.682166	CDKN2A
DOID:5746	ovarian serous cystadenocarcinoma	http://www.ontobee.org/ontology/DOID?iri=http://purl.obolibrary.org/obo/DOID_5746	1	5	0.317665	0.682166	USP2
DOID:693	dental enamel hypoplasia	http://www.ontobee.org/ontology/DOID?iri=http://purl.obolibrary.org/obo/DOID_693	1	5	0.317665	0.682166	CNNM4
DOID:8618	oral cavity cancer	http://www.ontobee.org/ontology/DOID?iri=http://purl.obolibrary.org/obo/DOID_8618	1	5	0.317665	0.682166	CDKN2A
DOID:929	myopathy of extraocular muscle	http://www.ontobee.org/ontology/DOID?iri=http://purl.obolibrary.org/obo/DOID_929	1	5	0.317665	0.682166	HNRNPA1
DOID:930	orbital disease	http://www.ontobee.org/ontology/DOID?iri=http://purl.obolibrary.org/obo/DOID_930	1	5	0.317665	0.682166	HNRNPA1
DOID:10825	essential hypertension	http://www.ontobee.org/ontology/DOID?iri=http://purl.obolibrary.org/obo/DOID_10825	10	113	0.318587	0.682686	ADRB1;CAT;HGF;IGF1;LPL;PDE5A;SLC6A9;STK39;VEGFA;XYLT1
DOID:0060115	nervous system benign neoplasm	http://www.ontobee.org/ontology/DOID?iri=http://purl.obolibrary.org/obo/DOID_0060115	3	27	0.319343	0.68285	ESR1;KIT;SEMA3A
DOID:7166	thyroiditis	http://www.ontobee.org/ontology/DOID?iri=http://purl.obolibrary.org/obo/DOID_7166	5	51	0.320658	0.684207	CDC25B;HGF;IL6R;PDGFC;VEGFA
DOID:10608	celiac disease	http://www.ontobee.org/ontology/DOID?iri=http://purl.obolibrary.org/obo/DOID_10608	7	76	0.325331	0.686952	GTF2A1;HIF1A;IGF1;MLN;PON2;PON2;TFRC
DOID:0060033	autoimmune disease of peripheral nervous system	http://www.ontobee.org/ontology/DOID?iri=http://purl.obolibrary.org/obo/DOID_0060033	2	16	0.331514	0.686952	NR3C1;TTR
DOID:11722	myotonic dystrophy type 1	http://www.ontobee.org/ontology/DOID?iri=http://purl.obolibrary.org/obo/DOID_11722	2	16	0.331514	0.686952	CDKN2A;MBNL1
DOID:12842	Guillain-Barre syndrome	http://www.ontobee.org/ontology/DOID?iri=http://purl.obolibrary.org/obo/DOID_12842	2	16	0.331514	0.686952	NR3C1;TTR
DOID:1882	atrial heart septal defect	http://www.ontobee.org/ontology/DOID?iri=http://purl.obolibrary.org/obo/DOID_1882	2	16	0.331514	0.686952	ACTC1;TLL1
DOID:1969	cerebral palsy	http://www.ontobee.org/ontology/DOID?iri=http://purl.obolibrary.org/obo/DOID_1969	2	16	0.331514	0.686952	IGF1;IGFBP3
DOID:240	iris disease	http://www.ontobee.org/ontology/DOID?iri=http://purl.obolibrary.org/obo/DOID_240	2	16	0.331514	0.686952	FOXC1;WT1
DOID:2615	papilloma	http://www.ontobee.org/ontology/DOID?iri=http://purl.obolibrary.org/obo/DOID_2615	2	16	0.331514	0.686952	CDKN2A;RARB
DOID:3490	Noonan syndrome	http://www.ontobee.org/ontology/DOID?iri=http://purl.obolibrary.org/obo/DOID_3490	2	16	0.331514	0.686952	CBL;SHOC2
DOID:5241	hemangioblastoma	http://www.ontobee.org/ontology/DOID?iri=http://purl.obolibrary.org/obo/DOID_5241	2	16	0.331514	0.686952	HIF1A;SLC18A2
DOID:5395	functioning pituitary adenoma	http://www.ontobee.org/ontology/DOID?iri=http://purl.obolibrary.org/obo/DOID_5395	2	16	0.331514	0.686952	ERBB2;LIF
DOID:540	strabismus	http://www.ontobee.org/ontology/DOID?iri=http://purl.obolibrary.org/obo/DOID_540	2	16	0.331514	0.686952	CBL;IGF1
DOID:8719	in situ carcinoma	http://www.ontobee.org/ontology/DOID?iri=http://purl.obolibrary.org/obo/DOID_8719	2	16	0.331514	0.686952	CCND2;RARB
DOID:9477	pulmonary embolism	http://www.ontobee.org/ontology/DOID?iri=http://purl.obolibrary.org/obo/DOID_9477	2	16	0.331514	0.686952	F3;SERPINF2
DOID:1067	open-angle glaucoma	http://www.ontobee.org/ontology/DOID?iri=http://purl.obolibrary.org/obo/DOID_1067	5	52	0.335556	0.693897	ADRB1;COL8A1;EDNRA;ESR1;SLC4A10
DOID:3193	peripheral nerve sheath neoplasm	http://www.ontobee.org/ontology/DOID?iri=http://purl.obolibrary.org/obo/DOID_3193	3	28	0.340077	0.700363	CDKN2A;KIT;SOX9
DOID:3304	germinoma	http://www.ontobee.org/ontology/DOID?iri=http://purl.obolibrary.org/obo/DOID_3304	3	28	0.340077	0.700363	GJA1;KIT;SOX17
DOID:3326	purpura	http://www.ontobee.org/ontology/DOID?iri=http://purl.obolibrary.org/obo/DOID_3326	6	65	0.344058	0.707114	ADAMTS13;CAT;HGF;IGF1;SERPINF2;VEGFA
DOID:2645	benign mesothelioma	http://www.ontobee.org/ontology/DOID?iri=http://purl.obolibrary.org/obo/DOID_2645	5	53	0.350511	0.717923	ACTR1A;CDKN2A;PEA15;SRC;VEGFA
DOID:10283	prostate cancer	http://www.ontobee.org/ontology/DOID?iri=http://purl.obolibrary.org/obo/DOID_10283	31	390	0.350746	0.717923	ADAMTS13;AKR1C2;CCND2;CDKN2A;CTNND2;DLC1;EPHA2;ERBB2;ESR1;ETV6;F2RL3;F3;HGF;HIF1A;IGF1;IGFBP3;JAK1;MAP3K1;MMP15;RARB;RHEB;RUNX2;SCN9A;SEMA3A;SKP2;SOCS3;SRC;TPT1;USP2;VEGFA;VIM
DOID:2490	congenital nervous system abnormality	http://www.ontobee.org/ontology/DOID?iri=http://purl.obolibrary.org/obo/DOID_2490	4	41	0.356466	0.717947	FEZF2;FOXG1;FOXH1;SIX3
DOID:11836	clubfoot	http://www.ontobee.org/ontology/DOID?iri=http://purl.obolibrary.org/obo/DOID_11836	2	17	0.359079	0.717947	FHL1;WNT7A
DOID:8923	skin melanoma	http://www.ontobee.org/ontology/DOID?iri=http://purl.obolibrary.org/obo/DOID_8923	2	17	0.359079	0.717947	CDKN2A;SKP2
DOID:688	embryonal cancer	http://www.ontobee.org/ontology/DOID?iri=http://purl.obolibrary.org/obo/DOID_688	27	339	0.360425	0.717947	ACTR1A;CAT;CCKBR;CCND2;CCNE1;CDKN2A;HMG20B;HSP90AA1;IGF1;IGFBP3;ITGA6;JAK1;KIT;MAP2K4;MTUS1;NEUROD1;PRDM1;RUNX2;SKP2;SMAD2;SNAI1;SOX17;STAG1;TNKS2;WNT7A;WT1;ZNF202
DOID:1074	kidney failure	http://www.ontobee.org/ontology/DOID?iri=http://purl.obolibrary.org/obo/DOID_1074	12	143	0.360711	0.717947	ADAMTS13;ADRA1D;ESR1;F3;HGF;HIF1A;IL6R;ITGA8;RUNX2;TFRC;TNFRSF1A;VEGFA
DOID:2797	idiopathic interstitial pneumonia	http://www.ontobee.org/ontology/DOID?iri=http://purl.obolibrary.org/obo/DOID_2797	3	29	0.360767	0.717947	CCL18;CDKN2A;IGFBP3
DOID:10154	small intestine cancer	http://www.ontobee.org/ontology/DOID?iri=http://purl.obolibrary.org/obo/DOID_10154	1	6	0.367908	0.717947	ERBB2
DOID:10320	asbestosis	http://www.ontobee.org/ontology/DOID?iri=http://purl.obolibrary.org/obo/DOID_10320	1	6	0.367908	0.717947	CAT
DOID:1039	prolymphocytic leukemia	http://www.ontobee.org/ontology/DOID?iri=http://purl.obolibrary.org/obo/DOID_1039	1	6	0.367908	0.717947	VEGFA
DOID:11615	penile cancer	http://www.ontobee.org/ontology/DOID?iri=http://purl.obolibrary.org/obo/DOID_11615	1	6	0.367908	0.717947	CDKN2A
DOID:12309	urticaria pigmentosa	http://www.ontobee.org/ontology/DOID?iri=http://purl.obolibrary.org/obo/DOID_12309	1	6	0.367908	0.717947	KIT
DOID:1270	hereditary hemorrhagic telangiectasia	http://www.ontobee.org/ontology/DOID?iri=http://purl.obolibrary.org/obo/DOID_1270	1	6	0.367908	0.717947	VEGFA
DOID:1414	ovarian dysfunction	http://www.ontobee.org/ontology/DOID?iri=http://purl.obolibrary.org/obo/DOID_1414	1	6	0.367908	0.717947	ESR1
DOID:1614	male breast cancer	http://www.ontobee.org/ontology/DOID?iri=http://purl.obolibrary.org/obo/DOID_1614	1	6	0.367908	0.717947	ESR1
DOID:1673	pneumothorax	http://www.ontobee.org/ontology/DOID?iri=http://purl.obolibrary.org/obo/DOID_1673	1	6	0.367908	0.717947	HIF1A
DOID:1856	cherubism	http://www.ontobee.org/ontology/DOID?iri=http://purl.obolibrary.org/obo/DOID_1856	1	6	0.367908	0.717947	SRC
DOID:1907	malignant fibroxanthoma	http://www.ontobee.org/ontology/DOID?iri=http://purl.obolibrary.org/obo/DOID_1907	1	6	0.367908	0.717947	CDKN2A
DOID:3132	porphyria cutanea tarda	http://www.ontobee.org/ontology/DOID?iri=http://purl.obolibrary.org/obo/DOID_3132	1	6	0.367908	0.717947	TFRC
DOID:3449	penis carcinoma	http://www.ontobee.org/ontology/DOID?iri=http://purl.obolibrary.org/obo/DOID_3449	1	6	0.367908	0.717947	CDKN2A
DOID:4644	epidermolysis bullosa simplex	http://www.ontobee.org/ontology/DOID?iri=http://purl.obolibrary.org/obo/DOID_4644	1	6	0.367908	0.717947	VIM
DOID:5773	oral submucous fibrosis	http://www.ontobee.org/ontology/DOID?iri=http://purl.obolibrary.org/obo/DOID_5773	1	6	0.367908	0.717947	HIF1A
DOID:8691	mycosis fungoides	http://www.ontobee.org/ontology/DOID?iri=http://purl.obolibrary.org/obo/DOID_8691	1	6	0.367908	0.717947	CDKN2A
DOID:9719	proliferative vitreoretinopathy	http://www.ontobee.org/ontology/DOID?iri=http://purl.obolibrary.org/obo/DOID_9719	1	6	0.367908	0.717947	VEGFA
DOID:9720	vitreous disease	http://www.ontobee.org/ontology/DOID?iri=http://purl.obolibrary.org/obo/DOID_9720	1	6	0.367908	0.717947	VEGFA
DOID:0060037	developmental disorder of mental health	http://www.ontobee.org/ontology/DOID?iri=http://purl.obolibrary.org/obo/DOID_0060037	25	314	0.368617	0.717947	ADRA2A;DISC1;DLX2;DOCK4;FOXG1;GABRA5;GABRB1;GJA1;GLDC;GRIA2;GTF2I;HGF;HOXA1;ITGA4;NR3C1;NRXN1;NSDHL;NTNG1;PRPF40A;SCN1A;STK39;TSC1;TUSC3;VEGFA;ZNF711
DOID:0050737	autosomal recessive disease	http://www.ontobee.org/ontology/DOID?iri=http://purl.obolibrary.org/obo/DOID_0050737	23	289	0.377286	0.729476	ADRB1;BCL6;CALCR;CDKN2A;EDNRA;ELF2;GCLC;HIF1A;IGF1;IGFBP3;IL6R;ITGA4;NME1;NR3C1;RARB;SCD5;SLC20A1;SLC35C1;TFRC;TNFRSF1A;VCP;XYLT1;ZMPSTE24
DOID:8398	osteoarthritis	http://www.ontobee.org/ontology/DOID?iri=http://purl.obolibrary.org/obo/DOID_8398	14	171	0.378394	0.729476	DIO3;ESR1;FAP;FRZB;HIF1A;IL6R;P4HA1;P4HA2;SIRT1;SOX9;TIA1;TNFAIP3;VEGFA;VIM
DOID:409	liver disease	http://www.ontobee.org/ontology/DOID?iri=http://purl.obolibrary.org/obo/DOID_409	43	555	0.381303	0.729476	ADAMTS13;CBL;CCNE1;CDKN2A;CSNK1A1;DDX5;DFFA;DLC1;DNMT3A;ERBB2;ESR1;F3;FADD;FAP;FNDC3B;FOXA2;GCLC;GRB2;HGF;HIF1A;HNF1A;HSP90AA1;IGF1;IGFBP3;IL1RAPL2;IL6R;IRS2;JAK1;NEDD4;PTPN13;SFPQ;SKP2;SOCS1;SOCS3;SRC;ST6GAL1;THBD;THBS1;TIA1;TNFRSF1A;VEGFA;VIM;WT1
DOID:11394	adult respiratory distress syndrome	http://www.ontobee.org/ontology/DOID?iri=http://purl.obolibrary.org/obo/DOID_11394	3	30	0.381357	0.729476	F3;MYLK;VEGFA
DOID:5353	colonic disease	http://www.ontobee.org/ontology/DOID?iri=http://purl.obolibrary.org/obo/DOID_5353	3	30	0.381357	0.729476	GDNF;KIT;VIP
DOID:9778	irritable bowel syndrome	http://www.ontobee.org/ontology/DOID?iri=http://purl.obolibrary.org/obo/DOID_9778	6	68	0.384438	0.729476	KIT;MLN;PON2;PON2;TNFRSF1A;VEGFA
DOID:10883	herpangina	http://www.ontobee.org/ontology/DOID?iri=http://purl.obolibrary.org/obo/DOID_10883	2	18	0.386216	0.729476	CDKN2A;HSP90AA1
DOID:12252	Cushing's syndrome	http://www.ontobee.org/ontology/DOID?iri=http://purl.obolibrary.org/obo/DOID_12252	2	18	0.386216	0.729476	ADRA2A;NR3C1
DOID:13406	pulmonary sarcoidosis	http://www.ontobee.org/ontology/DOID?iri=http://purl.obolibrary.org/obo/DOID_13406	2	18	0.386216	0.729476	CCL18;VEGFA
DOID:2876	laryngeal squamous cell carcinoma	http://www.ontobee.org/ontology/DOID?iri=http://purl.obolibrary.org/obo/DOID_2876	2	18	0.386216	0.729476	CDKN2A;SKP2
DOID:3407	carotid artery disease	http://www.ontobee.org/ontology/DOID?iri=http://purl.obolibrary.org/obo/DOID_3407	2	18	0.386216	0.729476	DDAH1;HIF1A
DOID:5214	demyelinating polyneuropathy	http://www.ontobee.org/ontology/DOID?iri=http://purl.obolibrary.org/obo/DOID_5214	2	18	0.386216	0.729476	NR3C1;TTR
DOID:854	collagen disease	http://www.ontobee.org/ontology/DOID?iri=http://purl.obolibrary.org/obo/DOID_854	15	186	0.39419	0.729476	ABL1;ACVR1B;BCL2L11;CCL18;ESR1;FOSL2;HGF;IGF1;IGFBP3;SMAD2;STAT4;THBS1;TNFAIP3;VEGFA;ZMPSTE24
DOID:2462	retinal vascular disease	http://www.ontobee.org/ontology/DOID?iri=http://purl.obolibrary.org/obo/DOID_2462	5	56	0.395487	0.729476	HIF1A;IGF1;IGFBP3;KIT;VEGFA
DOID:8947	diabetic retinopathy	http://www.ontobee.org/ontology/DOID?iri=http://purl.obolibrary.org/obo/DOID_8947	5	56	0.395487	0.729476	HIF1A;IGF1;IGFBP3;KIT;VEGFA
DOID:3856	male reproductive organ cancer	http://www.ontobee.org/ontology/DOID?iri=http://purl.obolibrary.org/obo/DOID_3856	31	399	0.401315	0.729476	ADAMTS13;AKR1C2;CCND2;CDKN2A;CTNND2;DLC1;EPHA2;ERBB2;ESR1;ETV6;F2RL3;F3;HGF;HIF1A;IGF1;IGFBP3;JAK1;MAP3K1;MMP15;RARB;RHEB;RUNX2;SCN9A;SEMA3A;SKP2;SOCS3;SRC;TPT1;USP2;VEGFA;VIM
DOID:10223	dermatomyositis	http://www.ontobee.org/ontology/DOID?iri=http://purl.obolibrary.org/obo/DOID_10223	3	31	0.401798	0.729476	HGF;IL1RAPL2;VEGFA
DOID:1483	gingival disease	http://www.ontobee.org/ontology/DOID?iri=http://purl.obolibrary.org/obo/DOID_1483	3	31	0.401798	0.729476	FGF7;HGF;VEGFA
DOID:3277	thymus cancer	http://www.ontobee.org/ontology/DOID?iri=http://purl.obolibrary.org/obo/DOID_3277	3	31	0.401798	0.729476	ESR1;KIT;VNN2
DOID:0050117	disease by infectious agent	http://www.ontobee.org/ontology/DOID?iri=http://purl.obolibrary.org/obo/DOID_0050117	64	841	0.403408	0.729476	ACO1;ADAMTS13;BACH2;BCL2L11;CBL;CCL18;CDKN2A;CPSF4;CSNK1A1;DDX5;DFFA;DLC1;DNMT3A;ERBB2;ESR1;F3;FAP;FNDC3B;FOXA2;FUCA1;FUT9;GOLGA1;GRB2;HIF1A;HNF1A;HNRNPF;HSP90AA1;IDH1;IGF1;IL1RAPL2;IL6R;IPO5;IRS2;ITGA4;JAK1;KPNB1;LAMB3;MAP3K5;NEDD4;NR3C1;P2RY1;PGM1;PITX2;PRDM1;PSMD7;RBBP8;RHOF;RNF4;SIRT1;SKP2;SLC22A5;SOCS1;SOCS3;SRC;THBD;THBS1;TIA1;TNFRSF1A;UBE2I;VCP;VEGFA;VIM;YBX1;YY1
DOID:0080001	bone disease	http://www.ontobee.org/ontology/DOID?iri=http://purl.obolibrary.org/obo/DOID_0080001	58	762	0.40987	0.729476	BCL2L11;BMP2K;CA10;CALCR;CAT;CCL18;DIO3;ERBB2;ESR1;F3;FAP;FHL1;FKBP5;FRZB;GJA1;HGF;HIF1A;HOXD9;HSP90AA1;IGF1;IGFBP3;IL21R;IL6R;IRS2;ITGA4;ITGA6;KIT;LPAR3;MAP2K4;MAP2K7;MAP3K5;NEDD9;NR3C1;P4HA1;P4HA2;PLEK;PRDM1;PSMD7;PTPN13;RARB;RARG;REL;RUNX2;SIRT1;SLC22A5;SOCS1;SOX9;STAT4;THBS1;TIA1;TNFAIP3;TNFRSF1A;TPT1;VCP;VEGFA;VIM;VIP;WNT7A
DOID:2234	focal epilepsy	http://www.ontobee.org/ontology/DOID?iri=http://purl.obolibrary.org/obo/DOID_2234	5	57	0.410442	0.729476	ACOT7;FAM3C;GRIA2;LGI1;SCN1A
DOID:643	progressive multifocal leukoencephalopathy	http://www.ontobee.org/ontology/DOID?iri=http://purl.obolibrary.org/obo/DOID_643	5	57	0.410442	0.729476	BACH2;CSNK1A1;F3;HIF1A;RNF4
DOID:0050032	mineral metabolism disease	http://www.ontobee.org/ontology/DOID?iri=http://purl.obolibrary.org/obo/DOID_0050032	2	19	0.412839	0.729476	GALNT3;HLF
DOID:10575	calcium metabolism disease	http://www.ontobee.org/ontology/DOID?iri=http://purl.obolibrary.org/obo/DOID_10575	2	19	0.412839	0.729476	GALNT3;HLF
DOID:12377	spinal muscular atrophy	http://www.ontobee.org/ontology/DOID?iri=http://purl.obolibrary.org/obo/DOID_12377	2	19	0.412839	0.729476	GDNF;SYNCRIP
DOID:235	colonic benign neoplasm	http://www.ontobee.org/ontology/DOID?iri=http://purl.obolibrary.org/obo/DOID_235	2	19	0.412839	0.729476	CALB2;TNKS2
DOID:450	myotonic disease	http://www.ontobee.org/ontology/DOID?iri=http://purl.obolibrary.org/obo/DOID_450	2	19	0.412839	0.729476	CDKN2A;MBNL1
DOID:640	encephalomyelitis	http://www.ontobee.org/ontology/DOID?iri=http://purl.obolibrary.org/obo/DOID_640	2	19	0.412839	0.729476	FADD;PDSS1
DOID:0014667	disease of metabolism	http://www.ontobee.org/ontology/DOID?iri=http://purl.obolibrary.org/obo/DOID_0014667	74	978	0.413547	0.729476	ACO1;ADAMTS13;ADRA2A;ADRB1;CAPN5;CAT;CCL18;CDKN2A;CPOX;DDAH1;ERBB2;ESR1;EXTL2;F3;FADD;GALNT3;GALR1;GFPT2;GLDC;GLUD1;GRB2;HGF;HIF1A;HLF;HNF1A;IGF1;IGF2BP2;IGFBP3;IL21R;IL6R;INSIG2;IRS2;ITGA4;KCNJ2;KCNJ3;KCNJ3;KEAP1;KIT;KLF11;LPL;MAP3K1;MAP3K5;NEUROD1;NNAT;NR1H2;NR3C1;NRXN3;PEA15;PEX5;PFKP;PON2;PON2;RORA;SH2B3;SIRT1;SLC18A2;SLC22A5;SLC25A3;SLC29A3;SNAI1;SOCS1;SOCS3;SOX4;STAT4;TCF7;TFRC;THBD;TMEM70;…
DOID:0050702	neonatal period electroclinical syndrome	http://www.ontobee.org/ontology/DOID?iri=http://purl.obolibrary.org/obo/DOID_0050702	1	7	0.414458	0.729476	SCN1A
DOID:0060073	lymphatic system cancer	http://www.ontobee.org/ontology/DOID?iri=http://purl.obolibrary.org/obo/DOID_0060073	1	7	0.414458	0.729476	PRDM1
DOID:10459	common cold	http://www.ontobee.org/ontology/DOID?iri=http://purl.obolibrary.org/obo/DOID_10459	1	7	0.414458	0.729476	LPL
DOID:10854	salivary gland disease	http://www.ontobee.org/ontology/DOID?iri=http://purl.obolibrary.org/obo/DOID_10854	1	7	0.414458	0.729476	HGF
DOID:11030	corneal edema	http://www.ontobee.org/ontology/DOID?iri=http://purl.obolibrary.org/obo/DOID_11030	1	7	0.414458	0.729476	TGFB2
DOID:11031	bullous keratopathy	http://www.ontobee.org/ontology/DOID?iri=http://purl.obolibrary.org/obo/DOID_11031	1	7	0.414458	0.729476	TGFB2
DOID:11168	anogenital venereal wart	http://www.ontobee.org/ontology/DOID?iri=http://purl.obolibrary.org/obo/DOID_11168	1	7	0.414458	0.729476	VEGFA
DOID:12556	acute kidney tubular necrosis	http://www.ontobee.org/ontology/DOID?iri=http://purl.obolibrary.org/obo/DOID_12556	1	7	0.414458	0.729476	IL6R
DOID:14681	Silver-Russell syndrome	http://www.ontobee.org/ontology/DOID?iri=http://purl.obolibrary.org/obo/DOID_14681	1	7	0.414458	0.729476	GRB2
DOID:1498	cholera	http://www.ontobee.org/ontology/DOID?iri=http://purl.obolibrary.org/obo/DOID_1498	1	7	0.414458	0.729476	VCP
DOID:1727	retinal vein occlusion	http://www.ontobee.org/ontology/DOID?iri=http://purl.obolibrary.org/obo/DOID_1727	1	7	0.414458	0.729476	VEGFA
DOID:1996	rectum adenocarcinoma	http://www.ontobee.org/ontology/DOID?iri=http://purl.obolibrary.org/obo/DOID_1996	1	7	0.414458	0.729476	WT1
DOID:2283	keratopathy	http://www.ontobee.org/ontology/DOID?iri=http://purl.obolibrary.org/obo/DOID_2283	1	7	0.414458	0.729476	TGFB2
DOID:2988	antiphospholipid syndrome	http://www.ontobee.org/ontology/DOID?iri=http://purl.obolibrary.org/obo/DOID_2988	1	7	0.414458	0.729476	IGF1
DOID:3191	nemaline myopathy	http://www.ontobee.org/ontology/DOID?iri=http://purl.obolibrary.org/obo/DOID_3191	1	7	0.414458	0.729476	ACTC1
DOID:3284	thymic carcinoma	http://www.ontobee.org/ontology/DOID?iri=http://purl.obolibrary.org/obo/DOID_3284	1	7	0.414458	0.729476	KIT
DOID:3390	palmoplantar keratosis	http://www.ontobee.org/ontology/DOID?iri=http://purl.obolibrary.org/obo/DOID_3390	1	7	0.414458	0.729476	GJA1
DOID:3672	rhabdoid cancer	http://www.ontobee.org/ontology/DOID?iri=http://purl.obolibrary.org/obo/DOID_3672	1	7	0.414458	0.729476	CDKN2A
DOID:4015	spindle cell carcinoma	http://www.ontobee.org/ontology/DOID?iri=http://purl.obolibrary.org/obo/DOID_4015	1	7	0.414458	0.729476	SNAI1
DOID:422	congenital structural myopathy	http://www.ontobee.org/ontology/DOID?iri=http://purl.obolibrary.org/obo/DOID_422	1	7	0.414458	0.729476	ACTC1
DOID:4977	lymphedema	http://www.ontobee.org/ontology/DOID?iri=http://purl.obolibrary.org/obo/DOID_4977	1	7	0.414458	0.729476	HGF
DOID:5425	ovarian hyperstimulation syndrome	http://www.ontobee.org/ontology/DOID?iri=http://purl.obolibrary.org/obo/DOID_5425	1	7	0.414458	0.729476	VEGFA
DOID:5744	ovary serous adenocarcinoma	http://www.ontobee.org/ontology/DOID?iri=http://purl.obolibrary.org/obo/DOID_5744	1	7	0.414458	0.729476	USP2
DOID:5828	endometrioid ovary carcinoma	http://www.ontobee.org/ontology/DOID?iri=http://purl.obolibrary.org/obo/DOID_5828	1	7	0.414458	0.729476	IGFBP3
DOID:9406	hypopituitarism	http://www.ontobee.org/ontology/DOID?iri=http://purl.obolibrary.org/obo/DOID_9406	1	7	0.414458	0.729476	SIX3
DOID:229	female reproductive system disease	http://www.ontobee.org/ontology/DOID?iri=http://purl.obolibrary.org/obo/DOID_229	14	176	0.420873	0.738258	ACTN1;CAT;CDKN2A;DFFA;ESR1;F3;IGF1;IGFBP3;IL6R;LIF;PDGFA;VEGFA;WNT7A;WT1
DOID:1205	hypersensitivity reaction type I disease	http://www.ontobee.org/ontology/DOID?iri=http://purl.obolibrary.org/obo/DOID_1205	9	110	0.420917	0.738258	ACVR1;ADRA1D;CYSLTR1;ESR1;NR3C1;SCN9A;SOCS3;STAT5A;TPT1
DOID:12716	newborn respiratory distress syndrome	http://www.ontobee.org/ontology/DOID?iri=http://purl.obolibrary.org/obo/DOID_12716	3	32	0.422043	0.738943	F3;MYLK;TTR
DOID:13133	HELLP syndrome	http://www.ontobee.org/ontology/DOID?iri=http://purl.obolibrary.org/obo/DOID_13133	2	20	0.438875	0.76465	ADAM12;THBD
DOID:3907	lung squamous cell carcinoma	http://www.ontobee.org/ontology/DOID?iri=http://purl.obolibrary.org/obo/DOID_3907	2	20	0.438875	0.76465	EPHA2;WT1
DOID:0080014	chromosomal disease	http://www.ontobee.org/ontology/DOID?iri=http://purl.obolibrary.org/obo/DOID_0080014	10	125	0.439614	0.76465	ACADS;ACVR1;ADAM12;BACE1;GABRA5;GRB2;ITSN1;MAP3K1;THBS1;VAPA
DOID:421	hair disease	http://www.ontobee.org/ontology/DOID?iri=http://purl.obolibrary.org/obo/DOID_421	5	59	0.440177	0.76465	IGF1;LIF;MBTPS2;SLC29A3;SOX9
DOID:345	uterine disease	http://www.ontobee.org/ontology/DOID?iri=http://purl.obolibrary.org/obo/DOID_345	4	46	0.441676	0.76465	CAT;CDKN2A;F3;IGF1
DOID:1272	telangiectasis	http://www.ontobee.org/ontology/DOID?iri=http://purl.obolibrary.org/obo/DOID_1272	3	33	0.442052	0.76465	CDKN2A;HIF1A;VEGFA
DOID:3443	mammary Paget's disease	http://www.ontobee.org/ontology/DOID?iri=http://purl.obolibrary.org/obo/DOID_3443	3	33	0.442052	0.76465	ERBB2;STAT5A;VCP
DOID:10844	Japanese encephalitis	http://www.ontobee.org/ontology/DOID?iri=http://purl.obolibrary.org/obo/DOID_10844	1	8	0.457588	0.774219	MAP3K5
DOID:12918	thromboangiitis obliterans	http://www.ontobee.org/ontology/DOID?iri=http://purl.obolibrary.org/obo/DOID_12918	1	8	0.457588	0.774219	HGF
DOID:1440	Machado-Joseph disease	http://www.ontobee.org/ontology/DOID?iri=http://purl.obolibrary.org/obo/DOID_1440	1	8	0.457588	0.774219	BECN1
DOID:14447	gonadal dysgenesis	http://www.ontobee.org/ontology/DOID?iri=http://purl.obolibrary.org/obo/DOID_14447	1	8	0.457588	0.774219	MAP3K1
DOID:1659	supratentorial cancer	http://www.ontobee.org/ontology/DOID?iri=http://purl.obolibrary.org/obo/DOID_1659	1	8	0.457588	0.774219	CDKN2A
DOID:175	vascular cancer	http://www.ontobee.org/ontology/DOID?iri=http://purl.obolibrary.org/obo/DOID_175	1	8	0.457588	0.774219	ERG
DOID:176	cardiovascular cancer	http://www.ontobee.org/ontology/DOID?iri=http://purl.obolibrary.org/obo/DOID_176	1	8	0.457588	0.774219	ERG
DOID:4449	macular retinal edema	http://www.ontobee.org/ontology/DOID?iri=http://purl.obolibrary.org/obo/DOID_4449	1	8	0.457588	0.774219	VEGFA
DOID:4492	avian influenza	http://www.ontobee.org/ontology/DOID?iri=http://purl.obolibrary.org/obo/DOID_4492	1	8	0.457588	0.774219	UBE2I
DOID:6929	retinal edema	http://www.ontobee.org/ontology/DOID?iri=http://purl.obolibrary.org/obo/DOID_6929	1	8	0.457588	0.774219	VEGFA
DOID:8506	bullous pemphigoid	http://www.ontobee.org/ontology/DOID?iri=http://purl.obolibrary.org/obo/DOID_8506	1	8	0.457588	0.774219	ITGA6
DOID:8712	neurofibromatosis	http://www.ontobee.org/ontology/DOID?iri=http://purl.obolibrary.org/obo/DOID_8712	1	8	0.457588	0.774219	KIT
DOID:1555	urticaria	http://www.ontobee.org/ontology/DOID?iri=http://purl.obolibrary.org/obo/DOID_1555	4	47	0.458378	0.774219	CAT;F3;KIT;VEGFA
DOID:13207	proliferative diabetic retinopathy	http://www.ontobee.org/ontology/DOID?iri=http://purl.obolibrary.org/obo/DOID_13207	3	34	0.461786	0.774219	HIF1A;KIT;VEGFA
DOID:1923	sex differentiation disease	http://www.ontobee.org/ontology/DOID?iri=http://purl.obolibrary.org/obo/DOID_1923	3	34	0.461786	0.774219	IGF1;IRS2;NR3C1
DOID:0080015	physical disorder	http://www.ontobee.org/ontology/DOID?iri=http://purl.obolibrary.org/obo/DOID_0080015	9	114	0.463811	0.774219	ESR1;FEZF2;FOXG1;FOXH1;IGFBP3;PDGFC;SIX3;TMEM70;WTAP
DOID:13089	intracranial arterial disease	http://www.ontobee.org/ontology/DOID?iri=http://purl.obolibrary.org/obo/DOID_13089	2	21	0.464268	0.774219	HGF;TTR
DOID:1800	neuroendocrine carcinoma	http://www.ontobee.org/ontology/DOID?iri=http://purl.obolibrary.org/obo/DOID_1800	2	21	0.464268	0.774219	KIT;NEUROD1
DOID:2316	brain ischemia	http://www.ontobee.org/ontology/DOID?iri=http://purl.obolibrary.org/obo/DOID_2316	2	21	0.464268	0.774219	TIA1;VEGFA
DOID:3527	cerebral arterial disease	http://www.ontobee.org/ontology/DOID?iri=http://purl.obolibrary.org/obo/DOID_3527	2	21	0.464268	0.774219	HGF;TTR
DOID:6741	bilateral breast cancer	http://www.ontobee.org/ontology/DOID?iri=http://purl.obolibrary.org/obo/DOID_6741	2	21	0.464268	0.774219	KIT;WT1
DOID:2355	anemia	http://www.ontobee.org/ontology/DOID?iri=http://purl.obolibrary.org/obo/DOID_2355	16	208	0.464531	0.774219	ACO1;ADAMTS13;CBL;CDC42;F3;HSP90AA1;IGF1;IGFBP3;PIGA;TFRC;THBD;TINF2;TNFRSF1A;VEGFA;WT1;ZEB1
DOID:0060031	autoimmune disease of gastrointestinal tract	http://www.ontobee.org/ontology/DOID?iri=http://purl.obolibrary.org/obo/DOID_0060031	7	88	0.472773	0.78535	GTF2A1;HIF1A;IGF1;MLN;PON2;PON2;TFRC
DOID:3717	gastric adenocarcinoma	http://www.ontobee.org/ontology/DOID?iri=http://purl.obolibrary.org/obo/DOID_3717	7	88	0.472773	0.78535	CDK8;CDKN2A;EPHA2;ERBB2;HIF1A;IGFBP3;IL6R
DOID:9952	acute lymphocytic leukemia	http://www.ontobee.org/ontology/DOID?iri=http://purl.obolibrary.org/obo/DOID_9952	4	48	0.474907	0.787594	CCL18;CDKN2A;JAK1;WT1
DOID:4138	bile duct disease	http://www.ontobee.org/ontology/DOID?iri=http://purl.obolibrary.org/obo/DOID_4138	6	75	0.478028	0.788698	CDKN2A;ESR1;F3;HGF;HIF1A;VEGFA
DOID:12704	ataxia telangiectasia	http://www.ontobee.org/ontology/DOID?iri=http://purl.obolibrary.org/obo/DOID_12704	3	35	0.481212	0.788698	BCL6;CDKN2A;HIF1A
DOID:349	systemic mastocytosis	http://www.ontobee.org/ontology/DOID?iri=http://purl.obolibrary.org/obo/DOID_349	3	35	0.481212	0.788698	KIT;TNFRSF1A;VEGFA
DOID:870	neuropathy	http://www.ontobee.org/ontology/DOID?iri=http://purl.obolibrary.org/obo/DOID_870	17	224	0.484171	0.788698	CBL;ERBB2;ESR1;FHL1;FXR1;HNRNPA1;HOXA1;IGF1;NR3C1;SCN9A;THBD;TNFRSF1A;UCP3;VCP;VEGFA;VIM;YTHDC1
DOID:9471	meningitis	http://www.ontobee.org/ontology/DOID?iri=http://purl.obolibrary.org/obo/DOID_9471	2	22	0.488971	0.788698	HGF;VEGFA
DOID:1936	atherosclerosis	http://www.ontobee.org/ontology/DOID?iri=http://purl.obolibrary.org/obo/DOID_1936	23	306	0.489682	0.788698	ADAM9;CAT;CDKN2A;ESR1;F3;HGF;HNF1A;IGF1;IGFBP3;LPL;PDE4D;PDGFC;PON2;PON2;RORA;SIRT1;SOCS1;SOCS3;THBD;TNFRSF1A;VEGFA;YWHAZ;ZNF202
DOID:8692	myeloid leukemia	http://www.ontobee.org/ontology/DOID?iri=http://purl.obolibrary.org/obo/DOID_8692	10	130	0.490049	0.788698	BCL2L11;CBL;CDKN2A;IGF1;KIT;LYN;RARB;SKP2;SOCS3;WT1
DOID:0060058	lymphoma	http://www.ontobee.org/ontology/DOID?iri=http://purl.obolibrary.org/obo/DOID_0060058	6	76	0.491116	0.788698	BCL2L11;BCL6;CDKN2A;DLC1;KIT;REL
DOID:9741	biliary tract disease	http://www.ontobee.org/ontology/DOID?iri=http://purl.obolibrary.org/obo/DOID_9741	6	76	0.491116	0.788698	CDKN2A;ESR1;F3;HGF;HIF1A;VEGFA
DOID:3118	hepatobiliary disease	http://www.ontobee.org/ontology/DOID?iri=http://purl.obolibrary.org/obo/DOID_3118	43	578	0.493982	0.788698	ADAMTS13;CBL;CCNE1;CDKN2A;CSNK1A1;DDX5;DFFA;DLC1;DNMT3A;ERBB2;ESR1;F3;FADD;FAP;FNDC3B;FOXA2;GCLC;GRB2;HGF;HIF1A;HNF1A;HSP90AA1;IGF1;IGFBP3;IL1RAPL2;IL6R;IRS2;JAK1;NEDD4;PTPN13;SFPQ;SKP2;SOCS1;SOCS3;SRC;ST6GAL1;THBD;THBS1;TIA1;TNFRSF1A;VEGFA;VIM;WT1
DOID:2348	arteriosclerotic cardiovascular disease	http://www.ontobee.org/ontology/DOID?iri=http://purl.obolibrary.org/obo/DOID_2348	23	307	0.496278	0.788698	ADAM9;CAT;CDKN2A;ESR1;F3;HGF;HNF1A;IGF1;IGFBP3;LPL;PDE4D;PDGFC;PON2;PON2;RORA;SIRT1;SOCS1;SOCS3;THBD;TNFRSF1A;VEGFA;YWHAZ;ZNF202
DOID:127	leiomyoma	http://www.ontobee.org/ontology/DOID?iri=http://purl.obolibrary.org/obo/DOID_127	7	90	0.49689	0.788698	CDKN2A;ESR1;IGF1;KLF11;PDGFC;TNFRSF1A;VEGFA
DOID:0050705	adolescence-adult electroclinical syndrome	http://www.ontobee.org/ontology/DOID?iri=http://purl.obolibrary.org/obo/DOID_0050705	1	9	0.497547	0.788698	SCN1A
DOID:0060039	autoimmune disease of skin and connective tissue	http://www.ontobee.org/ontology/DOID?iri=http://purl.obolibrary.org/obo/DOID_0060039	1	9	0.497547	0.788698	ITGA6
DOID:1080	filariasis	http://www.ontobee.org/ontology/DOID?iri=http://purl.obolibrary.org/obo/DOID_1080	1	9	0.497547	0.788698	VEGFA
DOID:11396	pulmonary edema	http://www.ontobee.org/ontology/DOID?iri=http://purl.obolibrary.org/obo/DOID_11396	1	9	0.497547	0.788698	VEGFA
DOID:12678	hypercalcemia	http://www.ontobee.org/ontology/DOID?iri=http://purl.obolibrary.org/obo/DOID_12678	1	9	0.497547	0.788698	HLF
DOID:1729	retinal vascular occlusion	http://www.ontobee.org/ontology/DOID?iri=http://purl.obolibrary.org/obo/DOID_1729	1	9	0.497547	0.788698	VEGFA
DOID:1932	Angelman syndrome	http://www.ontobee.org/ontology/DOID?iri=http://purl.obolibrary.org/obo/DOID_1932	1	9	0.497547	0.788698	GABRA5
DOID:2224	hemorrhagic thrombocythemia	http://www.ontobee.org/ontology/DOID?iri=http://purl.obolibrary.org/obo/DOID_2224	1	9	0.497547	0.788698	CD177
DOID:3021	acute kidney failure	http://www.ontobee.org/ontology/DOID?iri=http://purl.obolibrary.org/obo/DOID_3021	1	9	0.497547	0.788698	IL6R
DOID:3307	teratoma	http://www.ontobee.org/ontology/DOID?iri=http://purl.obolibrary.org/obo/DOID_3307	1	9	0.497547	0.788698	CDKN2A
DOID:3493	signet ring cell adenocarcinoma	http://www.ontobee.org/ontology/DOID?iri=http://purl.obolibrary.org/obo/DOID_3493	1	9	0.497547	0.788698	ATOH1
DOID:4890	juvenile myoclonic epilepsy	http://www.ontobee.org/ontology/DOID?iri=http://purl.obolibrary.org/obo/DOID_4890	1	9	0.497547	0.788698	SCN1A
DOID:5119	ovarian cyst	http://www.ontobee.org/ontology/DOID?iri=http://purl.obolibrary.org/obo/DOID_5119	1	9	0.497547	0.788698	VEGFA
DOID:585	nephrolithiasis	http://www.ontobee.org/ontology/DOID?iri=http://purl.obolibrary.org/obo/DOID_585	1	9	0.497547	0.788698	CALCR
DOID:6536	plasma cell neoplasm	http://www.ontobee.org/ontology/DOID?iri=http://purl.obolibrary.org/obo/DOID_6536	1	9	0.497547	0.788698	KIT
DOID:9965	toxoplasmosis	http://www.ontobee.org/ontology/DOID?iri=http://purl.obolibrary.org/obo/DOID_9965	1	9	0.497547	0.788698	ACO1
DOID:110	lens disease	http://www.ontobee.org/ontology/DOID?iri=http://purl.obolibrary.org/obo/DOID_110	4	50	0.507365	0.800474	EPHA2;KEAP1;SIRT1;TGFB2
DOID:11162	respiratory failure	http://www.ontobee.org/ontology/DOID?iri=http://purl.obolibrary.org/obo/DOID_11162	4	50	0.507365	0.800474	F3;MYLK;TTR;VEGFA
DOID:83	cataract	http://www.ontobee.org/ontology/DOID?iri=http://purl.obolibrary.org/obo/DOID_83	4	50	0.507365	0.800474	EPHA2;KEAP1;SIRT1;TGFB2
DOID:10126	keratoconus	http://www.ontobee.org/ontology/DOID?iri=http://purl.obolibrary.org/obo/DOID_10126	2	23	0.512947	0.805487	COL8A1;TGFB2
DOID:13543	hyperparathyroidism	http://www.ontobee.org/ontology/DOID?iri=http://purl.obolibrary.org/obo/DOID_13543	2	23	0.512947	0.805487	IL6R;WT1
DOID:3151	skin squamous cell carcinoma	http://www.ontobee.org/ontology/DOID?iri=http://purl.obolibrary.org/obo/DOID_3151	2	23	0.512947	0.805487	CDKN2A;THBS1
DOID:0060072	benign neoplasm	http://www.ontobee.org/ontology/DOID?iri=http://purl.obolibrary.org/obo/DOID_0060072	39	528	0.515913	0.80888	ACTR1A;CALB2;CCKBR;CDKN2A;CHL1;ERBB2;ESR1;FGF7;FRZB;GJA1;HGF;HIF1A;HNF1A;IGF1;IGFBP3;KIT;KLF11;LIF;NEUROD1;NME1;NNAT;OGN;PDGFA;PDGFC;PEA15;RARB;RHEB;SEMA3A;SLC18A2;SMAD2;SOCS1;SOX9;SRC;THBS1;TNFRSF1A;TNKS2;VEGFA;WNT7A;WT1
DOID:2742	auditory system disease	http://www.ontobee.org/ontology/DOID?iri=http://purl.obolibrary.org/obo/DOID_2742	6	78	0.516958	0.809256	ADAMTS13;BCL6;CDKN2A;IL6R;MYO1C;VEGFA
DOID:896	metal metabolism disorder	http://www.ontobee.org/ontology/DOID?iri=http://purl.obolibrary.org/obo/DOID_896	3	37	0.519028	0.810895	ACO1;KCNJ2;TFRC
DOID:0060089	endocrine organ benign neoplasm	http://www.ontobee.org/ontology/DOID?iri=http://purl.obolibrary.org/obo/DOID_0060089	7	92	0.520655	0.810895	CDKN2A;ERBB2;LIF;NEUROD1;NME1;NNAT;VEGFA
DOID:4989	pancreatitis	http://www.ontobee.org/ontology/DOID?iri=http://purl.obolibrary.org/obo/DOID_4989	8	106	0.523928	0.810895	ADAMTS13;CDKN2A;EDNRA;F3;LPL;PPP3CA;TNFRSF1A;VEGFA
DOID:8577	ulcerative colitis	http://www.ontobee.org/ontology/DOID?iri=http://purl.obolibrary.org/obo/DOID_8577	5	65	0.526696	0.810895	CDKN2A;HERC2;LPL;SLC22A5;SOCS3
DOID:1229	paranoid schizophrenia	http://www.ontobee.org/ontology/DOID?iri=http://purl.obolibrary.org/obo/DOID_1229	1	10	0.534568	0.810895	YWHAZ
DOID:13025	retinopathy of prematurity	http://www.ontobee.org/ontology/DOID?iri=http://purl.obolibrary.org/obo/DOID_13025	1	10	0.534568	0.810895	VEGFA
DOID:13544	low tension glaucoma	http://www.ontobee.org/ontology/DOID?iri=http://purl.obolibrary.org/obo/DOID_13544	1	10	0.534568	0.810895	EDNRA
DOID:13636	Fanconi's anemia	http://www.ontobee.org/ontology/DOID?iri=http://purl.obolibrary.org/obo/DOID_13636	1	10	0.534568	0.810895	HSP90AA1
DOID:1387	hypolipoproteinemia	http://www.ontobee.org/ontology/DOID?iri=http://purl.obolibrary.org/obo/DOID_1387	1	10	0.534568	0.810895	LPL
DOID:182	calcinosis	http://www.ontobee.org/ontology/DOID?iri=http://purl.obolibrary.org/obo/DOID_182	1	10	0.534568	0.810895	GALNT3
DOID:203	exostosis	http://www.ontobee.org/ontology/DOID?iri=http://purl.obolibrary.org/obo/DOID_203	1	10	0.534568	0.810895	HGF
DOID:2113	coccidiosis	http://www.ontobee.org/ontology/DOID?iri=http://purl.obolibrary.org/obo/DOID_2113	1	10	0.534568	0.810895	ACO1
DOID:2738	pseudoxanthoma elasticum	http://www.ontobee.org/ontology/DOID?iri=http://purl.obolibrary.org/obo/DOID_2738	1	10	0.534568	0.810895	XYLT1
DOID:2843	long QT syndrome	http://www.ontobee.org/ontology/DOID?iri=http://purl.obolibrary.org/obo/DOID_2843	1	10	0.534568	0.810895	KCND3
DOID:3179	inverted papilloma	http://www.ontobee.org/ontology/DOID?iri=http://purl.obolibrary.org/obo/DOID_3179	1	10	0.534568	0.810895	CDKN2A
DOID:3314	angiomyolipoma	http://www.ontobee.org/ontology/DOID?iri=http://purl.obolibrary.org/obo/DOID_3314	1	10	0.534568	0.810895	CHL1
DOID:3663	cutaneous mastocytosis	http://www.ontobee.org/ontology/DOID?iri=http://purl.obolibrary.org/obo/DOID_3663	1	10	0.534568	0.810895	KIT
DOID:3737	verrucous carcinoma	http://www.ontobee.org/ontology/DOID?iri=http://purl.obolibrary.org/obo/DOID_3737	1	10	0.534568	0.810895	CDKN2A
DOID:5200	urinary tract obstruction	http://www.ontobee.org/ontology/DOID?iri=http://purl.obolibrary.org/obo/DOID_5200	1	10	0.534568	0.810895	HIF1A
DOID:2352	hemochromatosis	http://www.ontobee.org/ontology/DOID?iri=http://purl.obolibrary.org/obo/DOID_2352	2	24	0.536171	0.810895	ACO1;TFRC
DOID:3192	neurilemmoma	http://www.ontobee.org/ontology/DOID?iri=http://purl.obolibrary.org/obo/DOID_3192	2	24	0.536171	0.810895	ESR1;KIT
DOID:11077	brucellosis	http://www.ontobee.org/ontology/DOID?iri=http://purl.obolibrary.org/obo/DOID_11077	3	38	0.537369	0.810895	THBD;TNFRSF1A;VEGFA
DOID:161	keratosis	http://www.ontobee.org/ontology/DOID?iri=http://purl.obolibrary.org/obo/DOID_161	3	38	0.537369	0.810895	CDKN2A;GJA1;VEGFA
DOID:3405	histiocytosis	http://www.ontobee.org/ontology/DOID?iri=http://purl.obolibrary.org/obo/DOID_3405	3	38	0.537369	0.810895	CCL18;FADD;SLC29A3
DOID:1184	nephrotic syndrome	http://www.ontobee.org/ontology/DOID?iri=http://purl.obolibrary.org/obo/DOID_1184	4	52	0.538896	0.81198	F3;NR3C1;VEGFA;WT1
DOID:4607	biliary tract cancer	http://www.ontobee.org/ontology/DOID?iri=http://purl.obolibrary.org/obo/DOID_4607	12	163	0.543374	0.817462	CDKN2A;ERBB2;ESR1;LAMB3;NME1;PTP4A3;SKP2;SNAI1;SOCS3;TTR;VEGFA;VIM
DOID:18	urinary system disease	http://www.ontobee.org/ontology/DOID?iri=http://purl.obolibrary.org/obo/DOID_18	32	438	0.545684	0.817462	ADAMTS13;ADRA1D;CALCR;CDKN2A;CHRM2;DDAH1;EDNRA;ERBB2;ESR1;F3;GDNF;HGF;HIF1A;IGF1;IGFBP3;IL6R;ITGA8;KIT;NR3C1;PDE4D;PDE5A;PGM1;PIGA;RUNX2;SIX1;SMAD2;STAT4;TFRC;THBS1;TNFRSF1A;VEGFA;WT1
DOID:0050013	carbohydrate metabolism disease	http://www.ontobee.org/ontology/DOID?iri=http://purl.obolibrary.org/obo/DOID_0050013	45	616	0.545882	0.817462	ADAMTS13;CAT;CDKN2A;DDAH1;FADD;GFPT2;GLDC;GLUD1;GRB2;HIF1A;HNF1A;IGF1;IGF2BP2;IGFBP3;IL21R;IL6R;IRS2;KEAP1;KLF11;LPL;MAP3K1;MAP3K5;NEUROD1;NR1H2;PEA15;PON2;PON2;SH2B3;SIRT1;SLC18A2;SLC22A5;SLC29A3;SNAI1;SOCS1;SOCS3;SOX4;STAT4;TCF7;THBD;TNFAIP3;TNFRSF1A;TSC1;TTR;UCP3;VEGFA
DOID:4194	glucose metabolism disease	http://www.ontobee.org/ontology/DOID?iri=http://purl.obolibrary.org/obo/DOID_4194	45	616	0.545882	0.817462	ADAMTS13;CAT;CDKN2A;DDAH1;FADD;GFPT2;GLDC;GLUD1;GRB2;HIF1A;HNF1A;IGF1;IGF2BP2;IGFBP3;IL21R;IL6R;IRS2;KEAP1;KLF11;LPL;MAP3K1;MAP3K5;NEUROD1;NR1H2;PEA15;PON2;PON2;SH2B3;SIRT1;SLC18A2;SLC22A5;SLC29A3;SNAI1;SOCS1;SOCS3;SOX4;STAT4;TCF7;THBD;TNFAIP3;TNFRSF1A;TSC1;TTR;UCP3;VEGFA
DOID:848	arthritis	http://www.ontobee.org/ontology/DOID?iri=http://purl.obolibrary.org/obo/DOID_848	44	604	0.553889	0.817462	BCL2L11;CAT;CCL18;DIO3;ERBB2;ESR1;F3;FAP;FKBP5;FRZB;HGF;HIF1A;HOXD9;HSP90AA1;IGF1;IL21R;IL6R;ITGA4;LPAR3;MAP2K4;MAP2K7;MAP3K5;NEDD9;NR3C1;P4HA1;P4HA2;PRDM1;PTPN13;RARB;RARG;REL;SIRT1;SLC22A5;SOCS1;SOX9;STAT4;THBS1;TIA1;TNFAIP3;TNFRSF1A;TPT1;VEGFA;VIM;VIP
DOID:1602	lymphadenitis	http://www.ontobee.org/ontology/DOID?iri=http://purl.obolibrary.org/obo/DOID_1602	4	53	0.554275	0.817462	HGF;SOCS1;SOCS3;VEGFA
DOID:5656	cranial nerve disease	http://www.ontobee.org/ontology/DOID?iri=http://purl.obolibrary.org/obo/DOID_5656	4	53	0.554275	0.817462	CBL;HOXA1;IGF1;SCN9A
DOID:9942	lymph node disease	http://www.ontobee.org/ontology/DOID?iri=http://purl.obolibrary.org/obo/DOID_9942	4	53	0.554275	0.817462	HGF;SOCS1;SOCS3;VEGFA
DOID:10241	thalassemia	http://www.ontobee.org/ontology/DOID?iri=http://purl.obolibrary.org/obo/DOID_10241	3	39	0.555305	0.817462	IGF1;ITGA4;TFRC
DOID:1389	polyneuropathy	http://www.ontobee.org/ontology/DOID?iri=http://purl.obolibrary.org/obo/DOID_1389	3	39	0.555305	0.817462	NR3C1;TTR;VEGFA
DOID:75	lymphatic system disease	http://www.ontobee.org/ontology/DOID?iri=http://purl.obolibrary.org/obo/DOID_75	7	95	0.555494	0.817462	CCL18;FADD;HGF;SLC29A3;SOCS1;SOCS3;VEGFA
DOID:11201	parathyroid gland disease	http://www.ontobee.org/ontology/DOID?iri=http://purl.obolibrary.org/obo/DOID_11201	2	25	0.558622	0.817462	IL6R;WT1
DOID:11613	hyperandrogenism	http://www.ontobee.org/ontology/DOID?iri=http://purl.obolibrary.org/obo/DOID_11613	2	25	0.558622	0.817462	IGF1;IRS2
DOID:205	hyperostosis	http://www.ontobee.org/ontology/DOID?iri=http://purl.obolibrary.org/obo/DOID_205	2	25	0.558622	0.817462	HGF;VCP
DOID:2600	laryngeal carcinoma	http://www.ontobee.org/ontology/DOID?iri=http://purl.obolibrary.org/obo/DOID_2600	2	25	0.558622	0.817462	CDKN2A;SKP2
DOID:2978	carbohydrate metabolic disorder	http://www.ontobee.org/ontology/DOID?iri=http://purl.obolibrary.org/obo/DOID_2978	2	25	0.558622	0.817462	KCNJ3;KCNJ3
DOID:3275	thymoma	http://www.ontobee.org/ontology/DOID?iri=http://purl.obolibrary.org/obo/DOID_3275	2	25	0.558622	0.817462	ESR1;VNN2
DOID:9446	cholangitis	http://www.ontobee.org/ontology/DOID?iri=http://purl.obolibrary.org/obo/DOID_9446	2	25	0.558622	0.817462	CDKN2A;HGF
DOID:2349	arteriosclerosis	http://www.ontobee.org/ontology/DOID?iri=http://purl.obolibrary.org/obo/DOID_2349	23	317	0.561244	0.817462	ADAM9;CAT;CDKN2A;ESR1;F3;HGF;HNF1A;IGF1;IGFBP3;LPL;PDE4D;PDGFC;PON2;PON2;RORA;SIRT1;SOCS1;SOCS3;THBD;TNFRSF1A;VEGFA;YWHAZ;ZNF202
DOID:4766	embryoma	http://www.ontobee.org/ontology/DOID?iri=http://purl.obolibrary.org/obo/DOID_4766	23	317	0.561244	0.817462	ACTR1A;CAT;CCKBR;CCNE1;CDKN2A;HMG20B;HSP90AA1;IGF1;IGFBP3;ITGA6;JAK1;KIT;MAP2K4;MTUS1;NEUROD1;RUNX2;SKP2;SMAD2;SNAI1;STAG1;TNKS2;WNT7A;WT1
DOID:1307	dementia	http://www.ontobee.org/ontology/DOID?iri=http://purl.obolibrary.org/obo/DOID_1307	32	442	0.567623	0.817462	ABL1;ADAMTS13;ADRB1;ATPAF2;BACE1;CDKN2A;CHRM2;DDIT4;ERG;ESR1;FUS;HSP90AA1;IGF1;ITSN1;LPL;NEDD9;NEFM;NR1H2;PICALM;PPID;PPP3CA;PSEN2;RAB7A;RNF146;SEMA3A;SLC18A2;THBS1;TNFRSF1A;TTR;VCP;VEGFA;WT1
DOID:0050704	childhood electroclinical syndrome	http://www.ontobee.org/ontology/DOID?iri=http://purl.obolibrary.org/obo/DOID_0050704	1	11	0.568867	0.817462	GLUD1
DOID:0050815	eye adnexa disease	http://www.ontobee.org/ontology/DOID?iri=http://purl.obolibrary.org/obo/DOID_0050815	1	11	0.568867	0.817462	HNRNPA1
DOID:11983	Prader-Willi syndrome	http://www.ontobee.org/ontology/DOID?iri=http://purl.obolibrary.org/obo/DOID_11983	1	11	0.568867	0.817462	ACADS
DOID:14504	Niemann-Pick disease	http://www.ontobee.org/ontology/DOID?iri=http://purl.obolibrary.org/obo/DOID_14504	1	11	0.568867	0.817462	CCL18
DOID:1825	childhood absence epilepsy	http://www.ontobee.org/ontology/DOID?iri=http://purl.obolibrary.org/obo/DOID_1825	1	11	0.568867	0.817462	GLUD1
DOID:3429	inclusion body myositis	http://www.ontobee.org/ontology/DOID?iri=http://purl.obolibrary.org/obo/DOID_3429	1	11	0.568867	0.817462	THBS1
DOID:3507	dermatofibrosarcoma protuberans	http://www.ontobee.org/ontology/DOID?iri=http://purl.obolibrary.org/obo/DOID_3507	1	11	0.568867	0.817462	RARB
DOID:4724	brain edema	http://www.ontobee.org/ontology/DOID?iri=http://purl.obolibrary.org/obo/DOID_4724	1	11	0.568867	0.817462	VEGFA
DOID:7757	childhood leukemia	http://www.ontobee.org/ontology/DOID?iri=http://purl.obolibrary.org/obo/DOID_7757	1	11	0.568867	0.817462	ETV6
DOID:962	neurofibroma	http://www.ontobee.org/ontology/DOID?iri=http://purl.obolibrary.org/obo/DOID_962	1	11	0.568867	0.817462	SOX9
DOID:13580	cholestasis	http://www.ontobee.org/ontology/DOID?iri=http://purl.obolibrary.org/obo/DOID_13580	4	54	0.569377	0.817462	ESR1;F3;HIF1A;VEGFA
DOID:2527	nephrosis	http://www.ontobee.org/ontology/DOID?iri=http://purl.obolibrary.org/obo/DOID_2527	4	54	0.569377	0.817462	F3;NR3C1;VEGFA;WT1
DOID:326	ischemia	http://www.ontobee.org/ontology/DOID?iri=http://purl.obolibrary.org/obo/DOID_326	14	194	0.57136	0.81914	ADAMTS13;ADORA1;ADRB1;HGF;HIF1A;KIT;LIF;PON2;PON2;THBD;THBS1;TIA1;TNFRSF1A;VEGFA
DOID:350	mastocytosis	http://www.ontobee.org/ontology/DOID?iri=http://purl.obolibrary.org/obo/DOID_350	3	40	0.57282	0.820063	KIT;TNFRSF1A;VEGFA
DOID:1040	chronic lymphocytic leukemia	http://www.ontobee.org/ontology/DOID?iri=http://purl.obolibrary.org/obo/DOID_1040	13	181	0.578741	0.823714	BCL2L11;CDKN2A;EPHA2;HSP90AA1;IL21R;ITGA4;LPL;PDE4D;RCBTB1;TFRC;TNFAIP3;VEGFA;ZFP36L1
DOID:0050701	electroclinical syndrome	http://www.ontobee.org/ontology/DOID?iri=http://purl.obolibrary.org/obo/DOID_0050701	2	26	0.580288	0.823714	GLUD1;SCN1A
DOID:10211	cholelithiasis	http://www.ontobee.org/ontology/DOID?iri=http://purl.obolibrary.org/obo/DOID_10211	2	26	0.580288	0.823714	ESR1;MLN
DOID:13129	severe pre-eclampsia	http://www.ontobee.org/ontology/DOID?iri=http://purl.obolibrary.org/obo/DOID_13129	2	26	0.580288	0.823714	ADAM12;THBD
DOID:3947	adrenal gland hyperfunction	http://www.ontobee.org/ontology/DOID?iri=http://purl.obolibrary.org/obo/DOID_3947	2	26	0.580288	0.823714	ADRA2A;NR3C1
DOID:780	placenta disease	http://www.ontobee.org/ontology/DOID?iri=http://purl.obolibrary.org/obo/DOID_780	2	26	0.580288	0.823714	F3;IGF1
DOID:74	hematopoietic system disease	http://www.ontobee.org/ontology/DOID?iri=http://purl.obolibrary.org/obo/DOID_74	30	418	0.587256	0.826497	ABL1;ACO1;ADAM12;ADAMTS13;CAT;CBL;CD177;CDC42;ETV6;F3;HGF;HSP90AA1;IDH1;IDH2;IGF1;IGFBP3;KIT;PIGA;SERPINF2;SH2B3;SOCS3;STAT5A;TFRC;THBD;THBS1;TINF2;TNFRSF1A;VEGFA;WT1;ZEB1
DOID:11054	urinary bladder cancer	http://www.ontobee.org/ontology/DOID?iri=http://purl.obolibrary.org/obo/DOID_11054	7	98	0.589185	0.826497	CDKN2A;EPHA2;ERBB2;MYBL2;RARB;VEGFA;VIM
DOID:10591	pre-eclampsia	http://www.ontobee.org/ontology/DOID?iri=http://purl.obolibrary.org/obo/DOID_10591	18	252	0.589287	0.826497	ADAM12;ADAMTS13;CAT;DDAH1;EDNRA;ESR1;F3;HIF1A;IGF1;IL6R;LIF;LPL;NR1H2;SOCS3;TFAP2C;TFAP2C;THBD;VEGFA
DOID:10603	glucose intolerance	http://www.ontobee.org/ontology/DOID?iri=http://purl.obolibrary.org/obo/DOID_10603	3	41	0.589901	0.826497	HNF1A;NEUROD1;TNFRSF1A
DOID:5223	infertility	http://www.ontobee.org/ontology/DOID?iri=http://purl.obolibrary.org/obo/DOID_5223	12	169	0.595224	0.826497	CDC25A;ESR1;GDNF;HOXA11;IL6R;ITGA4;ITGA6;LIF;PRM1;TRO;VEGFA;WNT7A
DOID:10652	Alzheimer's disease	http://www.ontobee.org/ontology/DOID?iri=http://purl.obolibrary.org/obo/DOID_10652	28	392	0.596632	0.826497	ABL1;ADRB1;BACE1;CDKN2A;CHRM2;DDIT4;ERG;ESR1;HSP90AA1;IGF1;ITSN1;LPL;NEDD9;NEFM;NR1H2;PICALM;PPID;PPP3CA;PSEN2;RAB7A;RNF146;SEMA3A;SLC18A2;TNFRSF1A;TTR;VCP;VEGFA;WT1
DOID:14250	Down syndrome	http://www.ontobee.org/ontology/DOID?iri=http://purl.obolibrary.org/obo/DOID_14250	4	56	0.598706	0.826497	ACVR1;BACE1;ITSN1;THBS1
DOID:557	kidney disease	http://www.ontobee.org/ontology/DOID?iri=http://purl.obolibrary.org/obo/DOID_557	31	434	0.599071	0.826497	ADAMTS13;ADRA1D;CALCR;CDKN2A;DDAH1;EDNRA;ERBB2;ESR1;F3;GDNF;HGF;HIF1A;IGF1;IGFBP3;IL6R;ITGA8;KIT;NR3C1;PDE4D;PDE5A;PGM1;PIGA;RUNX2;SIX1;SMAD2;STAT4;TFRC;THBS1;TNFRSF1A;VEGFA;WT1
DOID:10481	diaphragm disease	http://www.ontobee.org/ontology/DOID?iri=http://purl.obolibrary.org/obo/DOID_10481	1	12	0.600643	0.826497	HLX
DOID:11266	hemorrhagic fever with renal syndrome	http://www.ontobee.org/ontology/DOID?iri=http://purl.obolibrary.org/obo/DOID_11266	1	12	0.600643	0.826497	THBS1
DOID:13608	biliary atresia	http://www.ontobee.org/ontology/DOID?iri=http://purl.obolibrary.org/obo/DOID_13608	1	12	0.600643	0.826497	VEGFA
DOID:224	transient cerebral ischemia	http://www.ontobee.org/ontology/DOID?iri=http://purl.obolibrary.org/obo/DOID_224	1	12	0.600643	0.826497	TIA1
DOID:2913	acute pancreatitis	http://www.ontobee.org/ontology/DOID?iri=http://purl.obolibrary.org/obo/DOID_2913	1	12	0.600643	0.826497	LPL
DOID:321	tropical spastic paraparesis	http://www.ontobee.org/ontology/DOID?iri=http://purl.obolibrary.org/obo/DOID_321	1	12	0.600643	0.826497	VEGFA
DOID:3827	congenital diaphragmatic hernia	http://www.ontobee.org/ontology/DOID?iri=http://purl.obolibrary.org/obo/DOID_3827	1	12	0.600643	0.826497	HLX
DOID:4305	bone giant cell tumor	http://www.ontobee.org/ontology/DOID?iri=http://purl.obolibrary.org/obo/DOID_4305	1	12	0.600643	0.826497	SRC
DOID:4330	non-langerhans-cell histiocytosis	http://www.ontobee.org/ontology/DOID?iri=http://purl.obolibrary.org/obo/DOID_4330	1	12	0.600643	0.826497	CCL18
DOID:5166	endometrial stromal tumor	http://www.ontobee.org/ontology/DOID?iri=http://purl.obolibrary.org/obo/DOID_5166	1	12	0.600643	0.826497	WT1
DOID:5688	Werner syndrome	http://www.ontobee.org/ontology/DOID?iri=http://purl.obolibrary.org/obo/DOID_5688	1	12	0.600643	0.826497	SLC20A1
DOID:6419	tetralogy of Fallot	http://www.ontobee.org/ontology/DOID?iri=http://purl.obolibrary.org/obo/DOID_6419	1	12	0.600643	0.826497	GJA1
DOID:8502	bullous skin disease	http://www.ontobee.org/ontology/DOID?iri=http://purl.obolibrary.org/obo/DOID_8502	1	12	0.600643	0.826497	ITGA6
DOID:8541	Sezary's disease	http://www.ontobee.org/ontology/DOID?iri=http://purl.obolibrary.org/obo/DOID_8541	1	12	0.600643	0.826497	CDKN2A
DOID:4798	aggressive systemic mastocytosis	http://www.ontobee.org/ontology/DOID?iri=http://purl.obolibrary.org/obo/DOID_4798	2	27	0.601164	0.826497	TNFRSF1A;VEGFA
DOID:1883	hepatitis C	http://www.ontobee.org/ontology/DOID?iri=http://purl.obolibrary.org/obo/DOID_1883	15	212	0.602828	0.827653	ADAMTS13;CDKN2A;CSNK1A1;DDX5;DFFA;FAP;GRB2;IGF1;IL1RAPL2;JAK1;SOCS1;SOCS3;THBS1;VEGFA;VIM
DOID:0060084	cell type benign neoplasm	http://www.ontobee.org/ontology/DOID?iri=http://purl.obolibrary.org/obo/DOID_0060084	31	435	0.604444	0.828684	ACTR1A;CCKBR;CDKN2A;CHL1;ERBB2;ESR1;FGF7;FRZB;HGF;HIF1A;HNF1A;IGF1;IGFBP3;KLF11;NEUROD1;NME1;NNAT;OGN;PDGFA;PDGFC;PEA15;RARB;SLC18A2;SMAD2;SOCS1;SOX9;SRC;THBS1;TNFRSF1A;VEGFA;WT1
DOID:5517	stomach carcinoma	http://www.ontobee.org/ontology/DOID?iri=http://purl.obolibrary.org/obo/DOID_5517	10	142	0.605228	0.828684	CCKBR;CCND2;CDK8;CDKN2A;EPHA2;ERBB2;HIF1A;IGFBP3;IL6R;SKP2
DOID:552	pneumonia	http://www.ontobee.org/ontology/DOID?iri=http://purl.obolibrary.org/obo/DOID_552	7	100	0.610925	0.835346	CCL18;CDKN2A;IGFBP3;MYLK;STX2;THBD;VEGFA
DOID:2277	gonadal disease	http://www.ontobee.org/ontology/DOID?iri=http://purl.obolibrary.org/obo/DOID_2277	4	57	0.612915	0.836929	IGF1;IRS2;NMT2;NR3C1
DOID:4606	bile duct cancer	http://www.ontobee.org/ontology/DOID?iri=http://purl.obolibrary.org/obo/DOID_4606	9	129	0.61605	0.83761	CDKN2A;ERBB2;ESR1;PTP4A3;SNAI1;SOCS3;TTR;VEGFA;VIM
DOID:4897	bile duct carcinoma	http://www.ontobee.org/ontology/DOID?iri=http://purl.obolibrary.org/obo/DOID_4897	9	129	0.61605	0.83761	CDKN2A;ERBB2;ESR1;PTP4A3;SNAI1;SOCS3;TTR;VEGFA;VIM
DOID:7148	rheumatoid arthritis	http://www.ontobee.org/ontology/DOID?iri=http://purl.obolibrary.org/obo/DOID_7148	34	479	0.616899	0.83761	BCL2L11;CAT;CCL18;ERBB2;F3;FAP;FKBP5;HIF1A;HOXD9;IGF1;IL21R;IL6R;ITGA4;LPAR3;MAP2K4;MAP2K7;MAP3K5;NEDD9;NR3C1;PRDM1;PTPN13;RARB;RARG;REL;SLC22A5;SOCS1;STAT4;THBS1;TIA1;TNFAIP3;TNFRSF1A;TPT1;VEGFA;VIM
DOID:680	tauopathy	http://www.ontobee.org/ontology/DOID?iri=http://purl.obolibrary.org/obo/DOID_680	28	396	0.619005	0.83761	ABL1;ADRB1;BACE1;CDKN2A;CHRM2;DDIT4;ERG;ESR1;HSP90AA1;IGF1;ITSN1;LPL;NEDD9;NEFM;NR1H2;PICALM;PPID;PPP3CA;PSEN2;RAB7A;RNF146;SEMA3A;SLC18A2;TNFRSF1A;TTR;VCP;VEGFA;WT1
DOID:10907	microcephaly	http://www.ontobee.org/ontology/DOID?iri=http://purl.obolibrary.org/obo/DOID_10907	2	28	0.621247	0.83761	FEZF2;FOXG1
DOID:1712	aortic valve stenosis	http://www.ontobee.org/ontology/DOID?iri=http://purl.obolibrary.org/obo/DOID_1712	2	28	0.621247	0.83761	JARID2;VEGFA
DOID:9744	type 1 diabetes mellitus	http://www.ontobee.org/ontology/DOID?iri=http://purl.obolibrary.org/obo/DOID_9744	2	28	0.621247	0.83761	NEUROD1;SLC29A3
DOID:9119	acute myeloid leukemia	http://www.ontobee.org/ontology/DOID?iri=http://purl.obolibrary.org/obo/DOID_9119	7	101	0.621562	0.83761	CBL;CDKN2A;IGF1;KIT;RARB;SKP2;WT1
DOID:0080008	ischemic bone disease	http://www.ontobee.org/ontology/DOID?iri=http://purl.obolibrary.org/obo/DOID_0080008	3	43	0.622718	0.83761	HIF1A;IGFBP3;VEGFA
DOID:3480	uveal disease	http://www.ontobee.org/ontology/DOID?iri=http://purl.obolibrary.org/obo/DOID_3480	3	43	0.622718	0.83761	FOXC1;TRIB2;WT1
DOID:3342	bone inflammation disease	http://www.ontobee.org/ontology/DOID?iri=http://purl.obolibrary.org/obo/DOID_3342	45	634	0.628639	0.83761	BCL2L11;CAT;CCL18;DIO3;ERBB2;ESR1;F3;FAP;FKBP5;FRZB;HGF;HIF1A;HOXD9;HSP90AA1;IGF1;IL21R;IL6R;ITGA4;LPAR3;MAP2K4;MAP2K7;MAP3K5;NEDD9;NR3C1;P4HA1;P4HA2;PRDM1;PSMD7;PTPN13;RARB;RARG;REL;SIRT1;SLC22A5;SOCS1;SOX9;STAT4;THBS1;TIA1;TNFAIP3;TNFRSF1A;TPT1;VEGFA;VIM;VIP
DOID:526	Human immunodeficiency virus infectious disease	http://www.ontobee.org/ontology/DOID?iri=http://purl.obolibrary.org/obo/DOID_526	11	159	0.629947	0.83761	BACH2;CCL18;ESR1;F3;FUCA1;IDH1;LAMB3;NR3C1;PSMD7;SIRT1;YBX1
DOID:1089	tethered spinal cord syndrome	http://www.ontobee.org/ontology/DOID?iri=http://purl.obolibrary.org/obo/DOID_1089	1	13	0.630082	0.83761	JARID2
DOID:12176	goiter	http://www.ontobee.org/ontology/DOID?iri=http://purl.obolibrary.org/obo/DOID_12176	1	13	0.630082	0.83761	IGF1
DOID:12798	mucopolysaccharidosis	http://www.ontobee.org/ontology/DOID?iri=http://purl.obolibrary.org/obo/DOID_12798	1	13	0.630082	0.83761	EXTL2
DOID:12895	keratoconjunctivitis sicca	http://www.ontobee.org/ontology/DOID?iri=http://purl.obolibrary.org/obo/DOID_12895	1	13	0.630082	0.83761	HNRNPA1
DOID:13001	carotid stenosis	http://www.ontobee.org/ontology/DOID?iri=http://purl.obolibrary.org/obo/DOID_13001	1	13	0.630082	0.83761	HIF1A
DOID:13533	osteopetrosis	http://www.ontobee.org/ontology/DOID?iri=http://purl.obolibrary.org/obo/DOID_13533	1	13	0.630082	0.83761	PLEK
DOID:1395	schistosomiasis	http://www.ontobee.org/ontology/DOID?iri=http://purl.obolibrary.org/obo/DOID_1395	1	13	0.630082	0.83761	F3
DOID:9368	keratoconjunctivitis	http://www.ontobee.org/ontology/DOID?iri=http://purl.obolibrary.org/obo/DOID_9368	1	13	0.630082	0.83761	HNRNPA1
DOID:9351	diabetes mellitus	http://www.ontobee.org/ontology/DOID?iri=http://purl.obolibrary.org/obo/DOID_9351	40	566	0.634787	0.842748	ADAMTS13;CAT;CDKN2A;DDAH1;FADD;GFPT2;HNF1A;IGF1;IGF2BP2;IGFBP3;IL21R;IL6R;IRS2;KEAP1;KLF11;LPL;MAP3K1;MAP3K5;NEUROD1;NR1H2;PEA15;PON2;PON2;SH2B3;SIRT1;SLC18A2;SLC22A5;SLC29A3;SOCS1;SOCS3;SOX4;STAT4;TCF7;THBD;TNFAIP3;TNFRSF1A;TSC1;TTR;UCP3;VEGFA
DOID:4896	bile duct adenocarcinoma	http://www.ontobee.org/ontology/DOID?iri=http://purl.obolibrary.org/obo/DOID_4896	8	117	0.638027	0.844253	CDKN2A;ERBB2;PTP4A3;SNAI1;SOCS3;TTR;VEGFA;VIM
DOID:4947	cholangiocarcinoma	http://www.ontobee.org/ontology/DOID?iri=http://purl.obolibrary.org/obo/DOID_4947	8	117	0.638027	0.844253	CDKN2A;ERBB2;PTP4A3;SNAI1;SOCS3;TTR;VEGFA;VIM
DOID:3458	breast adenocarcinoma	http://www.ontobee.org/ontology/DOID?iri=http://purl.obolibrary.org/obo/DOID_3458	3	44	0.63844	0.844253	ERBB2;STAT5A;VCP
DOID:10316	pneumoconiosis	http://www.ontobee.org/ontology/DOID?iri=http://purl.obolibrary.org/obo/DOID_10316	2	29	0.640542	0.84481	CAT;ERBB2
DOID:319	spinal cord disease	http://www.ontobee.org/ontology/DOID?iri=http://purl.obolibrary.org/obo/DOID_319	2	29	0.640542	0.84481	JARID2;VEGFA
DOID:8469	influenza	http://www.ontobee.org/ontology/DOID?iri=http://purl.obolibrary.org/obo/DOID_8469	7	103	0.64235	0.846083	CPSF4;HNRNPF;IPO5;MAP3K5;SOCS1;SOCS3;UBE2I
DOID:1100	ovarian disease	http://www.ontobee.org/ontology/DOID?iri=http://purl.obolibrary.org/obo/DOID_1100	4	60	0.65363	0.850248	DFFA;ESR1;IGF1;VEGFA
DOID:3748	esophagus squamous cell carcinoma	http://www.ontobee.org/ontology/DOID?iri=http://purl.obolibrary.org/obo/DOID_3748	4	60	0.65363	0.850248	CDKN2A;ITGA4;RARB;WT1
DOID:65	connective tissue disease	http://www.ontobee.org/ontology/DOID?iri=http://purl.obolibrary.org/obo/DOID_65	18	262	0.656603	0.850248	ABL1;ACVR1;ACVR1B;BCL2L11;CAT;CCL18;ESR1;FOSL2;HGF;IGF1;IGFBP3;LYN;SMAD2;STAT4;THBS1;TNFAIP3;VEGFA;ZMPSTE24
DOID:10140	dry eye syndrome	http://www.ontobee.org/ontology/DOID?iri=http://purl.obolibrary.org/obo/DOID_10140	1	14	0.657356	0.850248	HNRNPA1
DOID:11465	autonomic nervous system disease	http://www.ontobee.org/ontology/DOID?iri=http://purl.obolibrary.org/obo/DOID_11465	1	14	0.657356	0.850248	SCN9A
DOID:12129	bulimia nervosa	http://www.ontobee.org/ontology/DOID?iri=http://purl.obolibrary.org/obo/DOID_12129	1	14	0.657356	0.850248	NR3C1
DOID:1400	lacrimal apparatus disease	http://www.ontobee.org/ontology/DOID?iri=http://purl.obolibrary.org/obo/DOID_1400	1	14	0.657356	0.850248	HNRNPA1
DOID:14268	sclerosing cholangitis	http://www.ontobee.org/ontology/DOID?iri=http://purl.obolibrary.org/obo/DOID_14268	1	14	0.657356	0.850248	CDKN2A
DOID:214	teeth hard tissue disease	http://www.ontobee.org/ontology/DOID?iri=http://purl.obolibrary.org/obo/DOID_214	1	14	0.657356	0.850248	CNNM4
DOID:2226	chronic myeloproliferative disease	http://www.ontobee.org/ontology/DOID?iri=http://purl.obolibrary.org/obo/DOID_2226	1	14	0.657356	0.850248	CD177
DOID:2870	endometrial adenocarcinoma	http://www.ontobee.org/ontology/DOID?iri=http://purl.obolibrary.org/obo/DOID_2870	1	14	0.657356	0.850248	CDKN2A
DOID:4231	histiocytoma	http://www.ontobee.org/ontology/DOID?iri=http://purl.obolibrary.org/obo/DOID_4231	1	14	0.657356	0.850248	CDKN2A
DOID:5408	Paget's disease of bone	http://www.ontobee.org/ontology/DOID?iri=http://purl.obolibrary.org/obo/DOID_5408	1	14	0.657356	0.850248	VCP
DOID:9667	placental abruption	http://www.ontobee.org/ontology/DOID?iri=http://purl.obolibrary.org/obo/DOID_9667	1	14	0.657356	0.850248	F3
DOID:594	panic disorder	http://www.ontobee.org/ontology/DOID?iri=http://purl.obolibrary.org/obo/DOID_594	2	30	0.659056	0.851351	CCKBR;ESR1
DOID:16	integumentary system disease	http://www.ontobee.org/ontology/DOID?iri=http://purl.obolibrary.org/obo/DOID_16	24	348	0.663752	0.856317	CAT;CCL18;CDKN2A;CYSLTR1;F3;GJA1;IGF1;IGFBP3;ITGA6;KIT;LAMB3;LIF;MBTPS2;PGP;RARB;REL;SLC29A3;SMAD2;SOX9;TFRC;TSC1;VEGFA;VIM;VIP
DOID:5295	intestinal disease	http://www.ontobee.org/ontology/DOID?iri=http://purl.obolibrary.org/obo/DOID_5295	10	149	0.666241	0.858425	BCL6;CDKN2A;GDNF;HERC2;KIT;LPL;SLC22A5;SOCS3;VEGFA;VIP
DOID:1176	bronchial disease	http://www.ontobee.org/ontology/DOID?iri=http://purl.obolibrary.org/obo/DOID_1176	9	135	0.670406	0.862098	ACVR1;CAT;CCL18;GCLC;ITGA4;MYLK;SMAD2;THBD;VEGFA
DOID:331	central nervous system disease	http://www.ontobee.org/ontology/DOID?iri=http://purl.obolibrary.org/obo/DOID_331	74	1047	0.673162	0.862098	ABL1;ACOT7;ADORA1;ADRB1;BACE1;BECN1;CALB2;CAT;CCKBR;CDKN2A;CHRM2;DDIT4;EDNRA;ELAVL4;ERG;ESR1;FADD;FAM3C;FGF20;FOXG1;FUS;GDNF;GLUD1;GLUD2;GRIA2;HGF;HSP90AA1;IGF1;IGFBP3;IL6R;ITGA4;ITSN1;JARID2;KCNA1;LGI1;LPL;LY6E;MAP3K5;NEDD9;NEFM;NR1H2;NR3C1;NR4A2;NTNG1;PDSS1;PHACTR2;PICALM;PON2;PON2;PPID;PPP3CA;PSEN2;RAB7A;RNF146;RRAD;RRAD;SCN1A;SEMA3A;SIAH1;SLC18A2;SMAD2;SOCS1;SYNCRIP;TCERG1;TIA1;TMEM106B;TNFRS…
DOID:15	reproductive system disease	http://www.ontobee.org/ontology/DOID?iri=http://purl.obolibrary.org/obo/DOID_15	25	364	0.674131	0.862098	ACTN1;CAT;CDC25A;CDKN2A;DFFA;ESR1;F3;GDNF;HOXA11;IGF1;IGFBP3;IL6R;IRS2;ITGA4;ITGA6;LIF;NCOA1;NMT2;NR3C1;PDGFA;PRM1;TRO;VEGFA;WNT7A;WT1
DOID:1059	intellectual disability	http://www.ontobee.org/ontology/DOID?iri=http://purl.obolibrary.org/obo/DOID_1059	8	121	0.675514	0.862098	GLDC;GTF2I;HOXA1;NRXN1;NSDHL;SCN1A;TUSC3;ZNF711
DOID:1279	ocular motility disease	http://www.ontobee.org/ontology/DOID?iri=http://purl.obolibrary.org/obo/DOID_1279	2	31	0.676798	0.862098	CBL;IGF1
DOID:1441	spinocerebellar ataxia	http://www.ontobee.org/ontology/DOID?iri=http://purl.obolibrary.org/obo/DOID_1441	2	31	0.676798	0.862098	BECN1;TTPA
DOID:2478	spinocerebellar degeneration	http://www.ontobee.org/ontology/DOID?iri=http://purl.obolibrary.org/obo/DOID_2478	2	31	0.676798	0.862098	BECN1;TTPA
DOID:0050743	mature T-cell and NK-cell lymphoma	http://www.ontobee.org/ontology/DOID?iri=http://purl.obolibrary.org/obo/DOID_0050743	1	15	0.682622	0.862098	CDKN2A
DOID:0050749	peripheral T-cell lymphoma	http://www.ontobee.org/ontology/DOID?iri=http://purl.obolibrary.org/obo/DOID_0050749	1	15	0.682622	0.862098	CDKN2A
DOID:0060061	cutaneous T cell lymphoma	http://www.ontobee.org/ontology/DOID?iri=http://purl.obolibrary.org/obo/DOID_0060061	1	15	0.682622	0.862098	CDKN2A
DOID:11870	Pick's disease	http://www.ontobee.org/ontology/DOID?iri=http://purl.obolibrary.org/obo/DOID_11870	1	15	0.682622	0.862098	ADORA1
DOID:11971	synostosis	http://www.ontobee.org/ontology/DOID?iri=http://purl.obolibrary.org/obo/DOID_11971	1	15	0.682622	0.862098	GJA1
DOID:1342	congenital hypoplastic anemia	http://www.ontobee.org/ontology/DOID?iri=http://purl.obolibrary.org/obo/DOID_1342	1	15	0.682622	0.862098	HSP90AA1
DOID:13564	aspergillosis	http://www.ontobee.org/ontology/DOID?iri=http://purl.obolibrary.org/obo/DOID_13564	1	15	0.682622	0.862098	TNFRSF1A
DOID:3319	lymphangioleiomyomatosis	http://www.ontobee.org/ontology/DOID?iri=http://purl.obolibrary.org/obo/DOID_3319	1	15	0.682622	0.862098	TSC1
DOID:8567	Hodgkin's lymphoma	http://www.ontobee.org/ontology/DOID?iri=http://purl.obolibrary.org/obo/DOID_8567	3	47	0.682816	0.862098	CDKN2A;DLC1;REL
DOID:37	skin disease	http://www.ontobee.org/ontology/DOID?iri=http://purl.obolibrary.org/obo/DOID_37	21	310	0.689214	0.868629	CAT;CCL18;CDKN2A;CYSLTR1;F3;GJA1;IGF1;IGFBP3;ITGA6;KIT;LAMB3;LIF;PGP;RARB;REL;SMAD2;TFRC;TSC1;VEGFA;VIM;VIP
DOID:574	peripheral nervous system disease	http://www.ontobee.org/ontology/DOID?iri=http://purl.obolibrary.org/obo/DOID_574	5	78	0.689718	0.868629	ESR1;NR3C1;SCN9A;TTR;VEGFA
DOID:12449	aplastic anemia	http://www.ontobee.org/ontology/DOID?iri=http://purl.obolibrary.org/obo/DOID_12449	4	63	0.691384	0.869389	HSP90AA1;PIGA;TINF2;WT1
DOID:12217	Lewy body dementia	http://www.ontobee.org/ontology/DOID?iri=http://purl.obolibrary.org/obo/DOID_12217	2	32	0.693781	0.869389	NR4A2;SLC18A2
DOID:2596	larynx cancer	http://www.ontobee.org/ontology/DOID?iri=http://purl.obolibrary.org/obo/DOID_2596	2	32	0.693781	0.869389	CDKN2A;SKP2
DOID:62	aortic valve disease	http://www.ontobee.org/ontology/DOID?iri=http://purl.obolibrary.org/obo/DOID_62	2	32	0.693781	0.869389	JARID2;VEGFA
DOID:987	alopecia	http://www.ontobee.org/ontology/DOID?iri=http://purl.obolibrary.org/obo/DOID_987	3	48	0.696677	0.871931	IGF1;LIF;MBTPS2
DOID:3068	glioblastoma multiforme	http://www.ontobee.org/ontology/DOID?iri=http://purl.obolibrary.org/obo/DOID_3068	4	64	0.7033	0.878032	BCL2L11;CDKN2A;KIT;WT1
DOID:784	chronic kidney failure	http://www.ontobee.org/ontology/DOID?iri=http://purl.obolibrary.org/obo/DOID_784	4	64	0.7033	0.878032	ADRA1D;ESR1;HGF;HIF1A
DOID:1993	rectum cancer	http://www.ontobee.org/ontology/DOID?iri=http://purl.obolibrary.org/obo/DOID_1993	1	16	0.70603	0.87852	WT1
DOID:9675	pulmonary emphysema	http://www.ontobee.org/ontology/DOID?iri=http://purl.obolibrary.org/obo/DOID_9675	1	16	0.70603	0.87852	CDKN2A
DOID:26	pancreas disease	http://www.ontobee.org/ontology/DOID?iri=http://purl.obolibrary.org/obo/DOID_26	10	154	0.706313	0.87852	ADAMTS13;CDKN2A;EDNRA;F3;GLUD1;IGF1;LPL;PPP3CA;TNFRSF1A;VEGFA
DOID:2018	hyperinsulinism	http://www.ontobee.org/ontology/DOID?iri=http://purl.obolibrary.org/obo/DOID_2018	3	49	0.710075	0.882108	GLUD1;IGF1;LPL
DOID:12365	malaria	http://www.ontobee.org/ontology/DOID?iri=http://purl.obolibrary.org/obo/DOID_12365	6	96	0.719171	0.892167	ADAMTS13;CCL18;FUT9;P2RY1;TNFRSF1A;VEGFA
DOID:440	neuromuscular disease	http://www.ontobee.org/ontology/DOID?iri=http://purl.obolibrary.org/obo/DOID_440	9	141	0.719948	0.892167	ERBB2;ESR1;FHL1;FXR1;HNRNPA1;NR3C1;VCP;VEGFA;YTHDC1
DOID:438	autoimmune disease of the nervous system	http://www.ontobee.org/ontology/DOID?iri=http://purl.obolibrary.org/obo/DOID_438	3	50	0.723014	0.892982	ESR1;NR3C1;TTR
DOID:4928	intrahepatic cholangiocarcinoma	http://www.ontobee.org/ontology/DOID?iri=http://purl.obolibrary.org/obo/DOID_4928	2	34	0.725537	0.892982	PTP4A3;VIM
DOID:635	acquired immunodeficiency syndrome	http://www.ontobee.org/ontology/DOID?iri=http://purl.obolibrary.org/obo/DOID_635	4	66	0.726126	0.892982	CCL18;LAMB3;NR3C1;YBX1
DOID:10487	Hirschsprung's disease	http://www.ontobee.org/ontology/DOID?iri=http://purl.obolibrary.org/obo/DOID_10487	1	17	0.727714	0.892982	GDNF
DOID:1827	idiopathic generalized epilepsy	http://www.ontobee.org/ontology/DOID?iri=http://purl.obolibrary.org/obo/DOID_1827	1	17	0.727714	0.892982	SCN1A
DOID:1852	intrahepatic cholestasis	http://www.ontobee.org/ontology/DOID?iri=http://purl.obolibrary.org/obo/DOID_1852	1	17	0.727714	0.892982	HIF1A
DOID:365	bladder disease	http://www.ontobee.org/ontology/DOID?iri=http://purl.obolibrary.org/obo/DOID_365	1	17	0.727714	0.892982	CHRM2
DOID:9206	Barrett's esophagus	http://www.ontobee.org/ontology/DOID?iri=http://purl.obolibrary.org/obo/DOID_9206	1	17	0.727714	0.892982	CDKN2A
DOID:2320	obstructive lung disease	http://www.ontobee.org/ontology/DOID?iri=http://purl.obolibrary.org/obo/DOID_2320	18	275	0.734817	0.900599	ACVR1;CAT;CCL18;CDKN2A;F3;FGF7;GCLC;HGF;HIF1A;HSP90AA1;ITGA4;MYLK;NR3C1;PDE4D;SIRT1;SMAD2;THBD;VEGFA
DOID:6364	migraine	http://www.ontobee.org/ontology/DOID?iri=http://purl.obolibrary.org/obo/DOID_6364	4	67	0.737039	0.902222	EDNRA;ESR1;SCN1A;VEGFA
DOID:883	parasitic helminthiasis infectious disease	http://www.ontobee.org/ontology/DOID?iri=http://purl.obolibrary.org/obo/DOID_883	2	35	0.740344	0.904308	F3;VEGFA
DOID:10763	hypertension	http://www.ontobee.org/ontology/DOID?iri=http://purl.obolibrary.org/obo/DOID_10763	36	534	0.740543	0.904308	ADAM12;ADAMTS13;ADRA2A;ADRB1;CAT;CDKN2A;DDAH1;EDNRA;ESR1;F3;FHL1;GCLC;HGF;HIF1A;IGF1;IL6R;LIF;LPL;LYVE1;NR1H2;NR3C1;PDE4D;PDE5A;SLC6A9;SMAD1;SOCS3;STK39;TFAP2C;TFAP2C;THBD;TRPC4;TTR;VEGFA;VIP;XYLT1;YY1
DOID:12132	Wegener's granulomatosis	http://www.ontobee.org/ontology/DOID?iri=http://purl.obolibrary.org/obo/DOID_12132	1	18	0.747802	0.908756	TNFRSF1A
DOID:200	giant cell tumor	http://www.ontobee.org/ontology/DOID?iri=http://purl.obolibrary.org/obo/DOID_200	1	18	0.747802	0.908756	SRC
DOID:799	varicose veins	http://www.ontobee.org/ontology/DOID?iri=http://purl.obolibrary.org/obo/DOID_799	1	18	0.747802	0.908756	VEGFA
DOID:9007	sudden infant death syndrome	http://www.ontobee.org/ontology/DOID?iri=http://purl.obolibrary.org/obo/DOID_9007	1	18	0.747802	0.908756	KCNJ2
DOID:0050589	inflammatory bowel disease	http://www.ontobee.org/ontology/DOID?iri=http://purl.obolibrary.org/obo/DOID_0050589	5	84	0.750648	0.910446	CDKN2A;HERC2;LPL;SLC22A5;SOCS3
DOID:2021	placenta cancer	http://www.ontobee.org/ontology/DOID?iri=http://purl.obolibrary.org/obo/DOID_2021	2	36	0.754464	0.910446	IGF1;RORA
DOID:3594	choriocarcinoma	http://www.ontobee.org/ontology/DOID?iri=http://purl.obolibrary.org/obo/DOID_3594	2	36	0.754464	0.910446	IGF1;RORA
DOID:783	end stage renal failure	http://www.ontobee.org/ontology/DOID?iri=http://purl.obolibrary.org/obo/DOID_783	2	36	0.754464	0.910446	ADRA1D;ESR1
DOID:866	vein disease	http://www.ontobee.org/ontology/DOID?iri=http://purl.obolibrary.org/obo/DOID_866	2	36	0.754464	0.910446	IGF1;VEGFA
DOID:5041	esophageal cancer	http://www.ontobee.org/ontology/DOID?iri=http://purl.obolibrary.org/obo/DOID_5041	8	131	0.758267	0.910446	CDKN2A;IGF1;IGFBP3;ITGA4;RARB;RNF34;VEGFA;WT1
DOID:28	endocrine system disease	http://www.ontobee.org/ontology/DOID?iri=http://purl.obolibrary.org/obo/DOID_28	23	352	0.758388	0.910446	ADAMTS13;ADRA2A;CDC25B;CDKN2A;EDNRA;F3;GLUD1;HGF;IGF1;IGFBP3;IL6R;IRS2;KIT;LPL;NMT2;NR3C1;PDGFC;PPP3CA;SIX3;ST6GAL1;TNFRSF1A;VEGFA;WT1
DOID:11714	gestational diabetes	http://www.ontobee.org/ontology/DOID?iri=http://purl.obolibrary.org/obo/DOID_11714	3	53	0.759131	0.910446	HNF1A;IGF1;IGFBP3
DOID:4535	hypotrichosis	http://www.ontobee.org/ontology/DOID?iri=http://purl.obolibrary.org/obo/DOID_4535	3	53	0.759131	0.910446	IGF1;LIF;MBTPS2
DOID:9588	encephalitis	http://www.ontobee.org/ontology/DOID?iri=http://purl.obolibrary.org/obo/DOID_9588	3	53	0.759131	0.910446	LGI1;MAP3K5;VEGFA
DOID:1826	epilepsy syndrome	http://www.ontobee.org/ontology/DOID?iri=http://purl.obolibrary.org/obo/DOID_1826	11	177	0.763838	0.910446	ACOT7;CALB2;FAM3C;FOXG1;GLUD1;GRIA2;KCNA1;LGI1;NTNG1;SCN1A;SOCS1
DOID:11372	megacolon	http://www.ontobee.org/ontology/DOID?iri=http://purl.obolibrary.org/obo/DOID_11372	1	19	0.766411	0.910446	GDNF
DOID:11724	limb-girdle muscular dystrophy	http://www.ontobee.org/ontology/DOID?iri=http://purl.obolibrary.org/obo/DOID_11724	1	19	0.766411	0.910446	VCP
DOID:1532	pleural disease	http://www.ontobee.org/ontology/DOID?iri=http://purl.obolibrary.org/obo/DOID_1532	1	19	0.766411	0.910446	HIF1A
DOID:1934	dysostosis	http://www.ontobee.org/ontology/DOID?iri=http://purl.obolibrary.org/obo/DOID_1934	1	19	0.766411	0.910446	GJA1
DOID:3087	gingivitis	http://www.ontobee.org/ontology/DOID?iri=http://purl.obolibrary.org/obo/DOID_3087	1	19	0.766411	0.910446	VEGFA
DOID:4254	osteosclerosis	http://www.ontobee.org/ontology/DOID?iri=http://purl.obolibrary.org/obo/DOID_4254	1	19	0.766411	0.910446	PLEK
DOID:8632	Kaposi's sarcoma	http://www.ontobee.org/ontology/DOID?iri=http://purl.obolibrary.org/obo/DOID_8632	1	19	0.766411	0.910446	LYN
DOID:437	myasthenia gravis	http://www.ontobee.org/ontology/DOID?iri=http://purl.obolibrary.org/obo/DOID_437	2	37	0.767918	0.910446	ESR1;NR3C1
DOID:2841	asthma	http://www.ontobee.org/ontology/DOID?iri=http://purl.obolibrary.org/obo/DOID_2841	7	117	0.767966	0.910446	ACVR1;CAT;CCL18;GCLC;ITGA4;MYLK;SMAD2
DOID:225	syndrome	http://www.ontobee.org/ontology/DOID?iri=http://purl.obolibrary.org/obo/DOID_225	103	1481	0.768217	0.910446	ACADS;ACVR1;ADAM12;ADAMTS13;ADRA2A;ADRB1;ATF5;ATF5;ATOH1;BACE1;BCOR;CALU;CAPN5;CBL;CCKBR;CDC42;CDKN2A;CNNM4;CRMP1;DISC1;DLX2;EDNRA;ELAVL4;ERG;ESR1;ETV6;F3;FADD;FHL1;FOXC1;FOXG1;GABRA5;GALNT3;GATA6;GJA1;GLUD1;GRB2;GTF2I;HGF;HOXA1;IDH1;IDH2;IGF1;IGFBP3;IL6R;IRS2;ITGA4;ITSN1;KCND3;KCNJ2;KIT;LPL;MBTPS2;MLN;MNX1;MYLK;MYO1C;NEUROD1;NME1;NR3C1;NSDHL;NTNG1;PHB2;PICALM;PITX2;POLD4;PON2;PON2;PRPF40A;PTPRG;…
DOID:1428	endocrine pancreas disease	http://www.ontobee.org/ontology/DOID?iri=http://purl.obolibrary.org/obo/DOID_1428	3	54	0.770293	0.911831	GLUD1;IGF1;LPL
DOID:7	disease of anatomical entity	http://www.ontobee.org/ontology/DOID?iri=http://purl.obolibrary.org/obo/DOID_7	244	3413	0.771202	0.911834	ABL1;ACADS;ACO1;ACOT7;ACTC1;ACTN1;ACVR1;ACVR1B;ADAM12;ADAM9;ADAMTS13;ADORA1;ADRA1D;ADRA2A;ADRB1;BACE1;BCL2L11;BCL6;BECN1;BMP2K;CA10;CALB2;CALCR;CAT;CBL;CCKBR;CCL18;CCNE1;CCNE2;CD177;CDC25A;CDC25B;CDC42;CDK2;CDKN2A;CHRM2;CNNM4;COL8A1;COL9A3;CSNK1A1;CTNND2;CYSLTR1;DDAH1;DDIT4;DDX5;DFFA;DIO3;DLC1;DNMT3A;EDNRA;ELAVL4;EPHA2;ERBB2;ERG;ESR1;ETV6;F3;FADD;FAM3C;FAP;FGF20;FGF7;FHL1;FKBP5;FNDC3B;FOSL2;FOXA2…
DOID:2789	parasitic protozoa infectious disease	http://www.ontobee.org/ontology/DOID?iri=http://purl.obolibrary.org/obo/DOID_2789	7	118	0.775555	0.915903	ACO1;ADAMTS13;CCL18;FUT9;P2RY1;TNFRSF1A;VEGFA
DOID:1319	brain cancer	http://www.ontobee.org/ontology/DOID?iri=http://purl.obolibrary.org/obo/DOID_1319	2	38	0.780726	0.919847	CAT;CDKN2A
DOID:439	neuromuscular junction disease	http://www.ontobee.org/ontology/DOID?iri=http://purl.obolibrary.org/obo/DOID_439	2	38	0.780726	0.919847	ESR1;NR3C1
DOID:4676	uremia	http://www.ontobee.org/ontology/DOID?iri=http://purl.obolibrary.org/obo/DOID_4676	1	20	0.78365	0.921132	RUNX2
DOID:8283	peritonitis	http://www.ontobee.org/ontology/DOID?iri=http://purl.obolibrary.org/obo/DOID_8283	1	20	0.78365	0.921132	IL6R
DOID:50	thyroid gland disease	http://www.ontobee.org/ontology/DOID?iri=http://purl.obolibrary.org/obo/DOID_50	9	150	0.784615	0.921189	CDC25B;HGF;IGF1;IGFBP3;IL6R;KIT;PDGFC;ST6GAL1;VEGFA
DOID:9408	acute myocardial infarction	http://www.ontobee.org/ontology/DOID?iri=http://purl.obolibrary.org/obo/DOID_9408	5	88	0.786051	0.921642	ADRB1;F3;HIF1A;IGF1;VEGFA
DOID:10952	nephritis	http://www.ontobee.org/ontology/DOID?iri=http://purl.obolibrary.org/obo/DOID_10952	8	135	0.786835	0.921642	CDKN2A;HGF;IGFBP3;KIT;PGM1;SMAD2;VEGFA;WT1
DOID:0050338	primary bacterial infectious disease	http://www.ontobee.org/ontology/DOID?iri=http://purl.obolibrary.org/obo/DOID_0050338	13	211	0.78797	0.921898	BCL2L11;IGF1;P2RY1;PGM1;PRDM1;SLC22A5;SOCS1;SOCS3;THBD;TNFRSF1A;VCP;VEGFA;VIM
DOID:3451	skin carcinoma	http://www.ontobee.org/ontology/DOID?iri=http://purl.obolibrary.org/obo/DOID_3451	3	56	0.79135	0.924775	CDKN2A;IGF1;THBS1
DOID:850	lung disease	http://www.ontobee.org/ontology/DOID?iri=http://purl.obolibrary.org/obo/DOID_850	29	448	0.797134	0.930452	ACVR1;CAT;CCL18;CDKN2A;ERBB2;F3;FGF7;FOSL2;GATA6;GCLC;HGF;HIF1A;HSP90AA1;IGF1;IGFBP3;ITGA4;METAP2;MYLK;NR3C1;PDE4D;SIRT1;SMAD2;SOCS1;STX2;THBD;TSC1;TTR;VEGFA;YY1
DOID:3702	cervical adenocarcinoma	http://www.ontobee.org/ontology/DOID?iri=http://purl.obolibrary.org/obo/DOID_3702	1	21	0.799619	0.932271	CDKN2A
DOID:11612	polycystic ovary syndrome	http://www.ontobee.org/ontology/DOID?iri=http://purl.obolibrary.org/obo/DOID_11612	9	154	0.809614	0.941694	ACVR1;CAPN5;ESR1;GATA6;IGF1;IRS2;RASA1;SOCS3;VEGFA
DOID:77	gastrointestinal system disease	http://www.ontobee.org/ontology/DOID?iri=http://purl.obolibrary.org/obo/DOID_77	55	825	0.811783	0.941694	ABL1;ADAMTS13;BCL6;CBL;CCNE1;CDKN2A;CNNM4;CSNK1A1;CYSLTR1;DDX5;DFFA;DLC1;DNMT3A;ERBB2;ESR1;F3;FADD;FAP;FGF7;FNDC3B;FOXA2;GCLC;GDNF;GRB2;HERC2;HGF;HIF1A;HNF1A;HSP90AA1;IGF1;IGFBP3;IL1RAPL2;IL6R;IRS2;JAK1;KIT;LPL;MLN;NEDD4;PTPN13;SFPQ;SKP2;SLC22A5;SOCS1;SOCS3;SRC;ST6GAL1;THBD;THBS1;TIA1;TNFRSF1A;VEGFA;VIM;VIP;WT1
DOID:11723	Duchenne muscular dystrophy	http://www.ontobee.org/ontology/DOID?iri=http://purl.obolibrary.org/obo/DOID_11723	1	22	0.814412	0.941694	NR3C1
DOID:4914	esophagus adenocarcinoma	http://www.ontobee.org/ontology/DOID?iri=http://purl.obolibrary.org/obo/DOID_4914	1	22	0.814412	0.941694	IGFBP3
DOID:9252	amino acid metabolic disorder	http://www.ontobee.org/ontology/DOID?iri=http://purl.obolibrary.org/obo/DOID_9252	1	22	0.814412	0.941694	SLC22A5
DOID:3083	chronic obstructive pulmonary disease	http://www.ontobee.org/ontology/DOID?iri=http://purl.obolibrary.org/obo/DOID_3083	12	201	0.815234	0.941694	CAT;CDKN2A;F3;FGF7;GCLC;HGF;HIF1A;HSP90AA1;NR3C1;PDE4D;SIRT1;VEGFA
DOID:1459	hypothyroidism	http://www.ontobee.org/ontology/DOID?iri=http://purl.obolibrary.org/obo/DOID_1459	2	41	0.815499	0.941694	IGF1;IGFBP3
DOID:3952	adrenal cortex disease	http://www.ontobee.org/ontology/DOID?iri=http://purl.obolibrary.org/obo/DOID_3952	2	41	0.815499	0.941694	ADRA2A;NR3C1
DOID:1398	parasitic infectious disease	http://www.ontobee.org/ontology/DOID?iri=http://purl.obolibrary.org/obo/DOID_1398	8	140	0.818949	0.941694	ACO1;ADAMTS13;CCL18;F3;FUT9;P2RY1;TNFRSF1A;VEGFA
DOID:0050161	lower respiratory tract disease	http://www.ontobee.org/ontology/DOID?iri=http://purl.obolibrary.org/obo/DOID_0050161	29	454	0.819139	0.941694	ACVR1;CAT;CCL18;CDKN2A;ERBB2;F3;FGF7;FOSL2;GATA6;GCLC;HGF;HIF1A;HSP90AA1;IGF1;IGFBP3;ITGA4;METAP2;MYLK;NR3C1;PDE4D;SIRT1;SMAD2;SOCS1;STX2;THBD;TSC1;TTR;VEGFA;YY1
DOID:5082	liver cirrhosis	http://www.ontobee.org/ontology/DOID?iri=http://purl.obolibrary.org/obo/DOID_5082	12	202	0.820355	0.941694	ADAMTS13;CCNE1;CDKN2A;F3;HGF;IGF1;IGFBP3;PTPN13;ST6GAL1;THBD;VEGFA;WT1
DOID:13241	Behcet's disease	http://www.ontobee.org/ontology/DOID?iri=http://purl.obolibrary.org/obo/DOID_13241	4	76	0.82082	0.941694	STAT4;THBD;TNFRSF1A;VEGFA
DOID:2871	endometrial carcinoma	http://www.ontobee.org/ontology/DOID?iri=http://purl.obolibrary.org/obo/DOID_2871	4	76	0.82082	0.941694	CDKN2A;RARB;SKP2;WT1
DOID:2921	glomerulonephritis	http://www.ontobee.org/ontology/DOID?iri=http://purl.obolibrary.org/obo/DOID_2921	4	76	0.82082	0.941694	IGFBP3;KIT;SMAD2;WT1
DOID:0060122	integumentary system cancer	http://www.ontobee.org/ontology/DOID?iri=http://purl.obolibrary.org/obo/DOID_0060122	5	93	0.824679	0.943496	CDKN2A;IGF1;SKP2;SMAD2;THBS1
DOID:4159	skin cancer	http://www.ontobee.org/ontology/DOID?iri=http://purl.obolibrary.org/obo/DOID_4159	5	93	0.824679	0.943496	CDKN2A;IGF1;SKP2;SMAD2;THBS1
DOID:9553	adrenal gland disease	http://www.ontobee.org/ontology/DOID?iri=http://purl.obolibrary.org/obo/DOID_9553	2	42	0.825947	0.943496	ADRA2A;NR3C1
DOID:657	adenoma	http://www.ontobee.org/ontology/DOID?iri=http://purl.obolibrary.org/obo/DOID_657	19	309	0.827501	0.943496	CCKBR;CDKN2A;ERBB2;ESR1;FRZB;HGF;HIF1A;HNF1A;IGFBP3;NEUROD1;NME1;NNAT;OGN;PDGFA;SMAD2;SOCS1;THBS1;VEGFA;WT1
DOID:6543	acne	http://www.ontobee.org/ontology/DOID?iri=http://purl.obolibrary.org/obo/DOID_6543	1	23	0.828115	0.943496	IGF1
DOID:9098	sebaceous gland disease	http://www.ontobee.org/ontology/DOID?iri=http://purl.obolibrary.org/obo/DOID_9098	1	23	0.828115	0.943496	IGF1
DOID:1107	esophageal carcinoma	http://www.ontobee.org/ontology/DOID?iri=http://purl.obolibrary.org/obo/DOID_1107	6	110	0.829901	0.943496	CDKN2A;IGFBP3;ITGA4;RARB;VEGFA;WT1
DOID:865	vasculitis	http://www.ontobee.org/ontology/DOID?iri=http://purl.obolibrary.org/obo/DOID_865	6	110	0.829901	0.943496	HIF1A;STAT4;THBD;TNFAIP3;TNFRSF1A;VEGFA
DOID:3393	coronary artery disease	http://www.ontobee.org/ontology/DOID?iri=http://purl.obolibrary.org/obo/DOID_3393	19	310	0.831527	0.944277	ADAMTS13;ADRB1;CDKN2A;ESR1;F3;HGF;HIF1A;HNF1A;IGF1;IGFBP3;INSIG2;LPL;PON2;PON2;SH2B3;THBD;THBS1;VEGFA;ZNF202
DOID:1588	thrombocytopenia	http://www.ontobee.org/ontology/DOID?iri=http://purl.obolibrary.org/obo/DOID_1588	3	61	0.837044	0.948386	ADAM12;ADAMTS13;THBD
DOID:1579	respiratory system disease	http://www.ontobee.org/ontology/DOID?iri=http://purl.obolibrary.org/obo/DOID_1579	32	504	0.839813	0.948386	ACVR1;CAT;CCL18;CDKN2A;CYSLTR1;ERBB2;F3;FGF7;FOSL2;GATA6;GCLC;HGF;HIF1A;HSP90AA1;IGF1;IGFBP3;ITGA4;LPL;METAP2;MYLK;NR3C1;PDE4D;SIRT1;SMAD2;SOCS1;STX2;THBD;TSC1;TTR;VEGFA;VIP;YY1
DOID:0060118	thoracic disease	http://www.ontobee.org/ontology/DOID?iri=http://purl.obolibrary.org/obo/DOID_0060118	1	24	0.840808	0.948386	ESR1
DOID:13809	familial combined hyperlipidemia	http://www.ontobee.org/ontology/DOID?iri=http://purl.obolibrary.org/obo/DOID_13809	1	24	0.840808	0.948386	LPL
DOID:3463	breast disease	http://www.ontobee.org/ontology/DOID?iri=http://purl.obolibrary.org/obo/DOID_3463	1	24	0.840808	0.948386	ESR1
DOID:687	hepatoblastoma	http://www.ontobee.org/ontology/DOID?iri=http://purl.obolibrary.org/obo/DOID_687	1	24	0.840808	0.948386	HGF
DOID:1070	primary open angle glaucoma	http://www.ontobee.org/ontology/DOID?iri=http://purl.obolibrary.org/obo/DOID_1070	2	44	0.845262	0.952032	COL8A1;SLC4A10
DOID:10534	stomach cancer	http://www.ontobee.org/ontology/DOID?iri=http://purl.obolibrary.org/obo/DOID_10534	15	254	0.848783	0.952032	ATOH1;BCL6;CCKBR;CCND2;CDK8;CDKN2A;DLC1;EPHA2;ERBB2;HIF1A;IGFBP3;IL6R;PTPRG;SIAH1;SKP2
DOID:12336	male infertility	http://www.ontobee.org/ontology/DOID?iri=http://purl.obolibrary.org/obo/DOID_12336	4	80	0.850311	0.952032	CDC25A;ESR1;NCOA1;PRM1
DOID:11963	esophagitis	http://www.ontobee.org/ontology/DOID?iri=http://purl.obolibrary.org/obo/DOID_11963	1	25	0.852566	0.952032	GDNF
DOID:13141	uveitis	http://www.ontobee.org/ontology/DOID?iri=http://purl.obolibrary.org/obo/DOID_13141	1	25	0.852566	0.952032	TRIB2
DOID:14069	cerebral malaria	http://www.ontobee.org/ontology/DOID?iri=http://purl.obolibrary.org/obo/DOID_14069	1	25	0.852566	0.952032	VEGFA
DOID:1924	hypogonadism	http://www.ontobee.org/ontology/DOID?iri=http://purl.obolibrary.org/obo/DOID_1924	1	25	0.852566	0.952032	NMT2
DOID:3978	extrinsic cardiomyopathy	http://www.ontobee.org/ontology/DOID?iri=http://purl.obolibrary.org/obo/DOID_3978	1	25	0.852566	0.952032	F3
DOID:820	myocarditis	http://www.ontobee.org/ontology/DOID?iri=http://purl.obolibrary.org/obo/DOID_820	1	25	0.852566	0.952032	F3
DOID:104	bacterial infectious disease	http://www.ontobee.org/ontology/DOID?iri=http://purl.obolibrary.org/obo/DOID_104	14	240	0.854008	0.952044	BCL2L11;F3;IGF1;P2RY1;PGM1;PRDM1;SLC22A5;SOCS1;SOCS3;THBD;TNFRSF1A;VCP;VEGFA;VIM
DOID:0060056	hypersensitivity reaction disease	http://www.ontobee.org/ontology/DOID?iri=http://purl.obolibrary.org/obo/DOID_0060056	39	611	0.854472	0.952044	ABL1;ACVR1;ACVR1B;ADRA1D;BCL2L11;CAT;CCL18;CYSLTR1;ESR1;FADD;FOSL2;GTF2A1;HGF;HIF1A;IGF1;IGFBP3;IL6R;ITGA6;JAK1;LYN;MLN;NR3C1;PON2;PON2;PTPN13;SCN9A;SMAD2;SOCS3;ST6GAL1;STAT4;STAT5A;TFRC;THBS1;TNFAIP3;TNFRSF1A;TPT1;TTR;VEGFA;ZMPSTE24
DOID:2723	dermatitis	http://www.ontobee.org/ontology/DOID?iri=http://purl.obolibrary.org/obo/DOID_2723	9	163	0.857797	0.954651	CCL18;CYSLTR1;ITGA6;LIF;REL;SMAD2;TFRC;VEGFA;VIP
DOID:0060038	specific developmental disorder	http://www.ontobee.org/ontology/DOID?iri=http://purl.obolibrary.org/obo/DOID_0060038	10	179	0.858711	0.954651	ADRA2A;GLDC;GTF2I;HOXA1;NR3C1;NRXN1;NSDHL;SCN1A;TUSC3;ZNF711
DOID:12858	Huntington's disease	http://www.ontobee.org/ontology/DOID?iri=http://purl.obolibrary.org/obo/DOID_12858	2	46	0.862612	0.957808	IGF1;TCERG1
DOID:2513	basal cell carcinoma	http://www.ontobee.org/ontology/DOID?iri=http://purl.obolibrary.org/obo/DOID_2513	1	26	0.863457	0.957808	CDKN2A
DOID:10871	age related macular degeneration	http://www.ontobee.org/ontology/DOID?iri=http://purl.obolibrary.org/obo/DOID_10871	3	65	0.867135	0.959769	HIF1A;RORA;VEGFA
DOID:2007	degeneration of macula and posterior pole	http://www.ontobee.org/ontology/DOID?iri=http://purl.obolibrary.org/obo/DOID_2007	3	65	0.867135	0.959769	HIF1A;RORA;VEGFA
DOID:9415	allergic asthma	http://www.ontobee.org/ontology/DOID?iri=http://purl.obolibrary.org/obo/DOID_9415	2	47	0.870603	0.962375	CCL18;GCLC
DOID:417	hypersensitivity reaction type II disease	http://www.ontobee.org/ontology/DOID?iri=http://purl.obolibrary.org/obo/DOID_417	32	515	0.871405	0.962375	ABL1;ACVR1B;BCL2L11;CAT;CCL18;ESR1;FOSL2;GTF2A1;HGF;HIF1A;IGF1;IGFBP3;IL6R;ITGA6;JAK1;LYN;MLN;NR3C1;PON2;PON2;PTPN13;SMAD2;SOCS3;ST6GAL1;STAT4;TFRC;THBS1;TNFAIP3;TNFRSF1A;TTR;VEGFA;ZMPSTE24
DOID:8670	eating disorder	http://www.ontobee.org/ontology/DOID?iri=http://purl.obolibrary.org/obo/DOID_8670	1	27	0.873545	0.96368	NR3C1
DOID:4079	heart valve disease	http://www.ontobee.org/ontology/DOID?iri=http://purl.obolibrary.org/obo/DOID_4079	2	48	0.878165	0.966562	JARID2;VEGFA
DOID:4448	macular degeneration	http://www.ontobee.org/ontology/DOID?iri=http://purl.obolibrary.org/obo/DOID_4448	3	67	0.880263	0.966562	HIF1A;RORA;VEGFA
DOID:10595	Charcot-Marie-Tooth disease	http://www.ontobee.org/ontology/DOID?iri=http://purl.obolibrary.org/obo/DOID_10595	1	28	0.882889	0.966562	ERBB2
DOID:1094	attention deficit hyperactivity disorder	http://www.ontobee.org/ontology/DOID?iri=http://purl.obolibrary.org/obo/DOID_1094	1	28	0.882889	0.966562	ADRA2A
DOID:13189	gout	http://www.ontobee.org/ontology/DOID?iri=http://purl.obolibrary.org/obo/DOID_13189	1	28	0.882889	0.966562	IL6R
DOID:1967	leiomyosarcoma	http://www.ontobee.org/ontology/DOID?iri=http://purl.obolibrary.org/obo/DOID_1967	1	28	0.882889	0.966562	CDKN2A
DOID:4230	smooth muscle cancer	http://www.ontobee.org/ontology/DOID?iri=http://purl.obolibrary.org/obo/DOID_4230	1	28	0.882889	0.966562	CDKN2A
DOID:3069	astrocytoma	http://www.ontobee.org/ontology/DOID?iri=http://purl.obolibrary.org/obo/DOID_3069	5	103	0.884994	0.967113	BCL2L11;CDKN2A;KIT;TSC1;WT1
DOID:13378	Kawasaki disease	http://www.ontobee.org/ontology/DOID?iri=http://purl.obolibrary.org/obo/DOID_13378	2	49	0.885318	0.967113	HGF;VEGFA
DOID:48	male reproductive system disease	http://www.ontobee.org/ontology/DOID?iri=http://purl.obolibrary.org/obo/DOID_48	5	104	0.889917	0.968345	CDC25A;ESR1;NCOA1;PRM1;VEGFA
DOID:0050735	X-linked disease	http://www.ontobee.org/ontology/DOID?iri=http://purl.obolibrary.org/obo/DOID_0050735	1	29	0.891545	0.968345	WNT7A
DOID:5426	premature ovarian failure	http://www.ontobee.org/ontology/DOID?iri=http://purl.obolibrary.org/obo/DOID_5426	1	29	0.891545	0.968345	ESR1
DOID:1380	endometrial cancer	http://www.ontobee.org/ontology/DOID?iri=http://purl.obolibrary.org/obo/DOID_1380	4	87	0.892056	0.968345	CDKN2A;RARB;SKP2;WT1
DOID:6050	esophageal disease	http://www.ontobee.org/ontology/DOID?iri=http://purl.obolibrary.org/obo/DOID_6050	2	50	0.89208	0.968345	CDKN2A;GDNF
DOID:1564	fungal infectious disease	http://www.ontobee.org/ontology/DOID?iri=http://purl.obolibrary.org/obo/DOID_1564	3	69	0.892226	0.968345	CDKN2A;RHOF;TNFRSF1A
DOID:363	uterine cancer	http://www.ontobee.org/ontology/DOID?iri=http://purl.obolibrary.org/obo/DOID_363	4	88	0.897104	0.972291	CDKN2A;RARB;SKP2;WT1
DOID:3247	rhabdomyosarcoma	http://www.ontobee.org/ontology/DOID?iri=http://purl.obolibrary.org/obo/DOID_3247	3	70	0.897797	0.972291	CDKN2A;NCOA1;VEGFA
DOID:5844	myocardial infarction	http://www.ontobee.org/ontology/DOID?iri=http://purl.obolibrary.org/obo/DOID_5844	14	255	0.905737	0.97698	ADAMTS13;ADRB1;ESR1;F3;HGF;HIF1A;IGF1;INSIG2;LPL;SH2B3;THBD;THBS1;VEGFA;ZNF202
DOID:2914	immune system disease	http://www.ontobee.org/ontology/DOID?iri=http://purl.obolibrary.org/obo/DOID_2914	63	983	0.906242	0.97698	ABL1;ACO1;ACVR1;ACVR1B;ADAM12;ADAMTS13;ADRA1D;BCL2L11;CAT;CBL;CCL18;CD177;CDC42;CYSLTR1;ESR1;ETV6;F3;FADD;FKBP5;FOSL2;GNAI1;GTF2A1;HGF;HIF1A;HSP90AA1;IDH1;IDH2;IGF1;IGFBP3;IL6R;ITGA6;JAK1;KIT;LYN;MLN;NR3C1;PIGA;PON2;PON2;PTPN13;SCN9A;SERPINF2;SH2B3;SLC29A3;SMAD2;SOCS1;SOCS3;ST6GAL1;STAT4;STAT5A;TFRC;THBD;THBS1;TINF2;TNFAIP3;TNFRSF1A;TPT1;TTR;VEGFA;WT1;YY1;ZEB1;ZMPSTE24
DOID:0060121	integumentary system benign neoplasm	http://www.ontobee.org/ontology/DOID?iri=http://purl.obolibrary.org/obo/DOID_0060121	1	31	0.906987	0.97698	FGF7
DOID:3165	skin benign neoplasm	http://www.ontobee.org/ontology/DOID?iri=http://purl.obolibrary.org/obo/DOID_3165	1	31	0.906987	0.97698	FGF7
DOID:9261	nasopharynx carcinoma	http://www.ontobee.org/ontology/DOID?iri=http://purl.obolibrary.org/obo/DOID_9261	1	31	0.906987	0.97698	CDKN2A
DOID:1927	sphingolipidosis	http://www.ontobee.org/ontology/DOID?iri=http://purl.obolibrary.org/obo/DOID_1927	1	32	0.913865	0.982922	CCL18
DOID:4029	gastritis	http://www.ontobee.org/ontology/DOID?iri=http://purl.obolibrary.org/obo/DOID_4029	2	54	0.915592	0.982922	ABL1;CYSLTR1
DOID:12361	Graves' disease	http://www.ontobee.org/ontology/DOID?iri=http://purl.obolibrary.org/obo/DOID_12361	3	74	0.917579	0.982922	IGF1;IL6R;ST6GAL1
DOID:4043	skeletal muscle cancer	http://www.ontobee.org/ontology/DOID?iri=http://purl.obolibrary.org/obo/DOID_4043	3	74	0.917579	0.982922	CDKN2A;NCOA1;VEGFA
DOID:14227	azoospermia	http://www.ontobee.org/ontology/DOID?iri=http://purl.obolibrary.org/obo/DOID_14227	1	33	0.920235	0.982922	NCOA1
DOID:811	lipodystrophy	http://www.ontobee.org/ontology/DOID?iri=http://purl.obolibrary.org/obo/DOID_811	1	33	0.920235	0.982922	RARB
DOID:6590	spondylitis	http://www.ontobee.org/ontology/DOID?iri=http://purl.obolibrary.org/obo/DOID_6590	2	55	0.920669	0.982922	PSMD7;TNFRSF1A
DOID:7147	ankylosing spondylitis	http://www.ontobee.org/ontology/DOID?iri=http://purl.obolibrary.org/obo/DOID_7147	2	55	0.920669	0.982922	PSMD7;TNFRSF1A
DOID:3310	atopic dermatitis	http://www.ontobee.org/ontology/DOID?iri=http://purl.obolibrary.org/obo/DOID_3310	6	129	0.921306	0.982922	CCL18;CYSLTR1;REL;SMAD2;VEGFA;VIP
DOID:12306	vitiligo	http://www.ontobee.org/ontology/DOID?iri=http://purl.obolibrary.org/obo/DOID_12306	2	57	0.929975	0.988656	CAT;ESR1
DOID:750	peptic ulcer disease	http://www.ontobee.org/ontology/DOID?iri=http://purl.obolibrary.org/obo/DOID_750	2	57	0.929975	0.988656	HIF1A;VEGFA
DOID:0050339	commensal bacterial infectious disease	http://www.ontobee.org/ontology/DOID?iri=http://purl.obolibrary.org/obo/DOID_0050339	1	35	0.931599	0.988656	F3
DOID:2473	opportunistic mycosis	http://www.ontobee.org/ontology/DOID?iri=http://purl.obolibrary.org/obo/DOID_2473	1	35	0.931599	0.988656	TNFRSF1A
DOID:3683	lung benign neoplasm	http://www.ontobee.org/ontology/DOID?iri=http://purl.obolibrary.org/obo/DOID_3683	1	35	0.931599	0.988656	WNT7A
DOID:1168	familial hyperlipidemia	http://www.ontobee.org/ontology/DOID?iri=http://purl.obolibrary.org/obo/DOID_1168	3	78	0.933813	0.98996	ESR1;IGF1;LPL
DOID:0050621	respiratory system benign neoplasm	http://www.ontobee.org/ontology/DOID?iri=http://purl.obolibrary.org/obo/DOID_0050621	1	36	0.93666	0.991932	WNT7A
DOID:0050828	artery disease	http://www.ontobee.org/ontology/DOID?iri=http://purl.obolibrary.org/obo/DOID_0050828	52	847	0.939867	0.992712	ADAM12;ADAM9;ADAMTS13;ADRA2A;ADRB1;CAT;CDKN2A;DDAH1;EDNRA;ESR1;F3;FHL1;GCLC;HGF;HIF1A;HNF1A;IGF1;IGFBP3;IL6R;INSIG2;LIF;LPL;LYVE1;NR1H2;NR3C1;PDE4D;PDE5A;PDGFC;PON2;PON2;RORA;SERPINF2;SH2B3;SIRT1;SLC6A9;SMAD1;SOCS1;SOCS3;STK39;TFAP2C;TFAP2C;THBD;THBS1;TNFRSF1A;TRPC4;TTR;VEGFA;VIP;XYLT1;YWHAZ;YY1;ZNF202
DOID:0060005	autoimmune disease of endocrine system	http://www.ontobee.org/ontology/DOID?iri=http://purl.obolibrary.org/obo/DOID_0060005	3	80	0.940776	0.992712	IGF1;IL6R;ST6GAL1
DOID:2916	hypersensitivity reaction type IV disease	http://www.ontobee.org/ontology/DOID?iri=http://purl.obolibrary.org/obo/DOID_2916	3	80	0.940776	0.992712	CCL18;FADD;VEGFA
DOID:10003	sensorineural hearing loss	http://www.ontobee.org/ontology/DOID?iri=http://purl.obolibrary.org/obo/DOID_10003	1	37	0.941347	0.992712	MYO1C
DOID:381	arthropathy	http://www.ontobee.org/ontology/DOID?iri=http://purl.obolibrary.org/obo/DOID_381	3	81	0.943998	0.99416	PSMD7;TNFRSF1A;VEGFA
DOID:655	inherited metabolic disorder	http://www.ontobee.org/ontology/DOID?iri=http://purl.obolibrary.org/obo/DOID_655	16	304	0.944709	0.99416	ACO1;CCL18;CPOX;ESR1;EXTL2;IGF1;ITGA4;KCNJ2;KCNJ3;KCNJ3;KIT;LPL;PEX5;SLC22A5;TFRC;VEGFA
DOID:0050136	systemic mycosis	http://www.ontobee.org/ontology/DOID?iri=http://purl.obolibrary.org/obo/DOID_0050136	1	38	0.945689	0.99416	TNFRSF1A
DOID:399	tuberculosis	http://www.ontobee.org/ontology/DOID?iri=http://purl.obolibrary.org/obo/DOID_399	6	138	0.947033	0.994227	P2RY1;PGM1;SLC22A5;SOCS1;SOCS3;VIM
DOID:2030	anxiety disorder	http://www.ontobee.org/ontology/DOID?iri=http://purl.obolibrary.org/obo/DOID_2030	2	62	0.948931	0.994227	CCKBR;ESR1
DOID:0050567	orofacial cleft	http://www.ontobee.org/ontology/DOID?iri=http://purl.obolibrary.org/obo/DOID_0050567	1	39	0.949709	0.994227	PDGFC
DOID:674	cleft palate	http://www.ontobee.org/ontology/DOID?iri=http://purl.obolibrary.org/obo/DOID_674	1	39	0.949709	0.994227	PDGFC
DOID:1091	tooth disease	http://www.ontobee.org/ontology/DOID?iri=http://purl.obolibrary.org/obo/DOID_1091	6	140	0.95161	0.994641	CDKN2A;CNNM4;ESR1;FGF7;HGF;VEGFA
DOID:1123	spondyloarthropathy	http://www.ontobee.org/ontology/DOID?iri=http://purl.obolibrary.org/obo/DOID_1123	2	63	0.952084	0.994641	PSMD7;TNFRSF1A
DOID:12894	Sjogren's syndrome	http://www.ontobee.org/ontology/DOID?iri=http://purl.obolibrary.org/obo/DOID_12894	2	64	0.955051	0.995417	HGF;STAT4
DOID:1287	cardiovascular system disease	http://www.ontobee.org/ontology/DOID?iri=http://purl.obolibrary.org/obo/DOID_1287	73	1169	0.955549	0.995417	ACTC1;ACVR1;ADAM12;ADAM9;ADAMTS13;ADORA1;ADRA2A;ADRB1;CAT;CDKN2A;CHRM2;DDAH1;EDNRA;ERBB2;ESR1;F3;FHL1;FOXC1;GATA6;GATM;GCLC;GJA1;HGF;HIF1A;HNF1A;IGF1;IGFBP3;IL6R;INSIG2;JARID2;KCND3;KIT;LIF;LPL;LYVE1;NR1H2;NR3C1;PDE4D;PDE5A;PDGFC;PGM1;PITX2;PON2;PON2;RORA;SCN9A;SERPINF2;SH2B3;SIRT1;SLC25A3;SLC6A9;SMAD1;SOCS1;SOCS3;STAT4;STK39;TFAP2C;TFAP2C;THBD;THBS1;TIA1;TLL1;TMEM70;TNFAIP3;TNFRSF1A;TRPC4;TTR;VE…
DOID:3388	periodontal disease	http://www.ontobee.org/ontology/DOID?iri=http://purl.obolibrary.org/obo/DOID_3388	5	124	0.956471	0.995417	CDKN2A;ESR1;FGF7;HGF;VEGFA
DOID:9500	leukocyte disease	http://www.ontobee.org/ontology/DOID?iri=http://purl.obolibrary.org/obo/DOID_9500	3	86	0.957804	0.995417	KIT;TNFRSF1A;VEGFA
DOID:76	stomach disease	http://www.ontobee.org/ontology/DOID?iri=http://purl.obolibrary.org/obo/DOID_76	2	65	0.957842	0.995417	ABL1;CYSLTR1
DOID:9352	type 2 diabetes mellitus	http://www.ontobee.org/ontology/DOID?iri=http://purl.obolibrary.org/obo/DOID_9352	9	197	0.959657	0.995417	CDKN2A;IGF1;IGF2BP2;IGFBP3;IL6R;LPL;MAP3K1;NEUROD1;SLC22A5
DOID:3146	lipid metabolism disorder	http://www.ontobee.org/ontology/DOID?iri=http://purl.obolibrary.org/obo/DOID_3146	3	88	0.962377	0.995417	ESR1;IGF1;LPL
DOID:403	mouth disease	http://www.ontobee.org/ontology/DOID?iri=http://purl.obolibrary.org/obo/DOID_403	7	165	0.964729	0.995417	CDKN2A;CNNM4;ESR1;FGF7;HGF;HIF1A;VEGFA
DOID:0060049	autoimmune disease of urogenital tract	http://www.ontobee.org/ontology/DOID?iri=http://purl.obolibrary.org/obo/DOID_0060049	2	68	0.965255	0.995417	HGF;PTPN13
DOID:12236	primary biliary cirrhosis	http://www.ontobee.org/ontology/DOID?iri=http://purl.obolibrary.org/obo/DOID_12236	2	68	0.965255	0.995417	HGF;PTPN13
DOID:4481	allergic rhinitis	http://www.ontobee.org/ontology/DOID?iri=http://purl.obolibrary.org/obo/DOID_4481	3	90	0.966482	0.995417	CYSLTR1;VEGFA;VIP
DOID:7998	hyperthyroidism	http://www.ontobee.org/ontology/DOID?iri=http://purl.obolibrary.org/obo/DOID_7998	3	90	0.966482	0.995417	IGF1;IL6R;ST6GAL1
DOID:2163	nasal cavity disease	http://www.ontobee.org/ontology/DOID?iri=http://purl.obolibrary.org/obo/DOID_2163	3	91	0.968373	0.995417	CYSLTR1;VEGFA;VIP
DOID:2825	nose disease	http://www.ontobee.org/ontology/DOID?iri=http://purl.obolibrary.org/obo/DOID_2825	3	91	0.968373	0.995417	CYSLTR1;VEGFA;VIP
DOID:4483	rhinitis	http://www.ontobee.org/ontology/DOID?iri=http://purl.obolibrary.org/obo/DOID_4483	3	91	0.968373	0.995417	CYSLTR1;VEGFA;VIP
DOID:480	movement disease	http://www.ontobee.org/ontology/DOID?iri=http://purl.obolibrary.org/obo/DOID_480	2	70	0.969483	0.995417	CHRM2;VEGFA
DOID:974	upper respiratory tract disease	http://www.ontobee.org/ontology/DOID?iri=http://purl.obolibrary.org/obo/DOID_974	4	112	0.969756	0.995417	CYSLTR1;LPL;VEGFA;VIP
DOID:8778	Crohn's disease	http://www.ontobee.org/ontology/DOID?iri=http://purl.obolibrary.org/obo/DOID_8778	1	46	0.970656	0.995417	SLC22A5
DOID:627	severe combined immunodeficiency	http://www.ontobee.org/ontology/DOID?iri=http://purl.obolibrary.org/obo/DOID_627	1	47	0.972831	0.995616	ABL1
DOID:7693	abdominal aortic aneurysm	http://www.ontobee.org/ontology/DOID?iri=http://purl.obolibrary.org/obo/DOID_7693	1	47	0.972831	0.995616	XYLT1
DOID:628	combined T cell and B cell immunodeficiency	http://www.ontobee.org/ontology/DOID?iri=http://purl.obolibrary.org/obo/DOID_628	1	48	0.974845	0.99633	ABL1
DOID:4045	muscle cancer	http://www.ontobee.org/ontology/DOID?iri=http://purl.obolibrary.org/obo/DOID_4045	3	96	0.976408	0.99633	CDKN2A;NCOA1;VEGFA
DOID:9074	systemic lupus erythematosus	http://www.ontobee.org/ontology/DOID?iri=http://purl.obolibrary.org/obo/DOID_9074	2	74	0.976503	0.99633	CAT;LYN
DOID:10579	leukodystrophy	http://www.ontobee.org/ontology/DOID?iri=http://purl.obolibrary.org/obo/DOID_10579	2	76	0.9794	0.9969	NR4A2;SLC18A2
DOID:11335	sarcoidosis	http://www.ontobee.org/ontology/DOID?iri=http://purl.obolibrary.org/obo/DOID_11335	2	76	0.9794	0.9969	CCL18;VEGFA
DOID:2952	inner ear disease	http://www.ontobee.org/ontology/DOID?iri=http://purl.obolibrary.org/obo/DOID_2952	1	51	0.980037	0.9969	MYO1C
DOID:8857	lupus erythematosus	http://www.ontobee.org/ontology/DOID?iri=http://purl.obolibrary.org/obo/DOID_8857	2	78	0.98195	0.997836	CAT;LYN
DOID:178	vascular disease	http://www.ontobee.org/ontology/DOID?iri=http://purl.obolibrary.org/obo/DOID_178	58	997	0.984127	0.998488	ADAM12;ADAM9;ADAMTS13;ADORA1;ADRA2A;ADRB1;CAT;CDKN2A;DDAH1;EDNRA;ESR1;F3;FHL1;GCLC;HGF;HIF1A;HNF1A;IGF1;IGFBP3;IL6R;INSIG2;KIT;LIF;LPL;LYVE1;NR1H2;NR3C1;PDE4D;PDE5A;PDGFC;PON2;PON2;RORA;SCN9A;SERPINF2;SH2B3;SIRT1;SLC6A9;SMAD1;SOCS1;SOCS3;STAT4;STK39;TFAP2C;TFAP2C;THBD;THBS1;TIA1;TNFAIP3;TNFRSF1A;TRPC4;TTR;VEGFA;VIP;XYLT1;YWHAZ;YY1;ZNF202
DOID:10584	retinitis pigmentosa	http://www.ontobee.org/ontology/DOID?iri=http://purl.obolibrary.org/obo/DOID_10584	1	56	0.986423	0.998488	SNRNP200
DOID:11260	rabies	http://www.ontobee.org/ontology/DOID?iri=http://purl.obolibrary.org/obo/DOID_11260	1	56	0.986423	0.998488	PITX2
DOID:3627	aortic aneurysm	http://www.ontobee.org/ontology/DOID?iri=http://purl.obolibrary.org/obo/DOID_3627	1	58	0.988364	0.998488	XYLT1
DOID:824	periodontitis	http://www.ontobee.org/ontology/DOID?iri=http://purl.obolibrary.org/obo/DOID_824	3	108	0.988527	0.998488	CDKN2A;ESR1;VEGFA
DOID:520	aortic disease	http://www.ontobee.org/ontology/DOID?iri=http://purl.obolibrary.org/obo/DOID_520	1	59	0.989228	0.998488	XYLT1
DOID:936	brain disease	http://www.ontobee.org/ontology/DOID?iri=http://purl.obolibrary.org/obo/DOID_936	20	421	0.990177	0.998488	ACOT7;CALB2;CHRM2;EDNRA;ESR1;FAM3C;FOXG1;GLUD1;GRIA2;IGF1;IGFBP3;KCNA1;LGI1;MAP3K5;NR4A2;NTNG1;SCN1A;SLC18A2;SOCS1;VEGFA
DOID:3612	retinitis	http://www.ontobee.org/ontology/DOID?iri=http://purl.obolibrary.org/obo/DOID_3612	1	62	0.991455	0.998488	SNRNP200
DOID:1443	cerebral degeneration	http://www.ontobee.org/ontology/DOID?iri=http://purl.obolibrary.org/obo/DOID_1443	2	90	0.991918	0.998488	NR4A2;SLC18A2
DOID:2377	multiple sclerosis	http://www.ontobee.org/ontology/DOID?iri=http://purl.obolibrary.org/obo/DOID_2377	5	158	0.992527	0.998488	CALB2;CAT;IL6R;ITGA4;NR3C1
DOID:3213	demyelinating disease	http://www.ontobee.org/ontology/DOID?iri=http://purl.obolibrary.org/obo/DOID_3213	5	164	0.994629	0.999602	CALB2;CAT;IL6R;ITGA4;NR3C1
DOID:3211	lysosomal storage disease	http://www.ontobee.org/ontology/DOID?iri=http://purl.obolibrary.org/obo/DOID_3211	3	136	0.998024	1	CCL18;EXTL2;VEGFA
DOID:9452	fatty liver disease	http://www.ontobee.org/ontology/DOID?iri=http://purl.obolibrary.org/obo/DOID_9452	1	86	0.998666	1	VEGFA
DOID:9455	lipid storage disease	http://www.ontobee.org/ontology/DOID?iri=http://purl.obolibrary.org/obo/DOID_9455	2	117	0.998743	1	CCL18;VEGFA
DOID:612	primary immunodeficiency disease	http://www.ontobee.org/ontology/DOID?iri=http://purl.obolibrary.org/obo/DOID_612	4	176	0.999286	1	ABL1;FKBP5;GNAI1;YY1
DOID:4	disease	http://www.ontobee.org/ontology/DOID?iri=http://purl.obolibrary.org/obo/DOID_4	458	6225	1	1	ABHD6;ABI3BP;ABL1;ACADS;ACO1;ACOT7;ACTC1;ACTN1;ACTR1A;ACVR1;ACVR1B;ADAM12;ADAM19;ADAM9;ADAMTS13;ADORA1;ADRA1D;ADRA2A;ADRB1;ADRM1;AKAP10;AKR1C2;ALCAM;ARGLU1;ARID4A;ARL4A;ATF1;ATF5;ATF5;ATOH1;ATP6V0B;ATP8A1;ATPAF2;AZIN1;B3GNT2;BACE1;BACH2;BCL2L10;BCL2L11;BCL6;BCOR;BECN1;BHLHE40;BMP2K;BTF3;BTG3;CA10;CALB2;CALCR;CALU;CAPN5;CAT;CBL;CCDC6;CCKBR;CCL18;CCND2;CCNE1;CCNE2;CCNK;CCNL1;CD177;CDC14A;CDC25A;CDC…
